# Supplementary material
Source: Research Square preprint supplement (doi:10.21203/rs.3.rs-9168576/v1)
Supplement: Supplementary file 1 [file 24fae581caf2eafc62c4ddc6.xlsx]

## Sheet: Dataset S1
	EPMA analyses	Sample PC314
				Oxide																		Det.Lim ppm(A)																StdDev wt%
	Comment	Al2O3	SiO2	CaO	FeO	ZrO2	HfO2	P2O5	Na2O	K2O	MnO	MgO	TiO2	Cr2O3	Total	Al	Si	Ca	Fe	Zr	Hf	P	O	Na	K	Mn	Mg	Ti	Cr	Al	Si	Ca	Fe	Zr	Hf	P	O	Na	K	Mn	Mg	Ti	Cr	Distance (µm)	Zr, wt%	1-Cx/Co	erf-1 (1-Cx/Co)
	314 - L2	0	31.5172	0	0.0568	63.7209	1.1822	0	0	0	0	0	0	0.0037	96.481		213		420	259	500								134	0	0.1378	0	0.036	0.2144	0.0621	0		0	0	-0.0008	-0.0001	0	0.0112	0
	314 - L2	0.0046	31.5464	0.001	0.0887	63.7707	1.1111	0	0	0	0.0068	0.0052	0	0.0034	96.5381	146	213	296	409	257	513					380	128		135	0.0122	0.1379	0.0247	0.0356	0.2145	0.0616	0		0	0	0.0318	0.0107	0	0.0113	5.02
	314 - L2	0	31.7142	0	0.0909	63.7435	1.1284	0	0	0	0	0.009	0	0	96.6861		210		426	257	519						124			-0.0001	0.1385	-0.0003	0.037	0.2145	0.0623	0		0	-0.0001	-0.0001	0.0105	0	-0.001	10.03
	314 - L2	0.0015	31.4945	0.0457	0.1738	63.4685	1.1438	0	0	0.0023	0.0103	0.0091	0	0	96.3497	148	213	279	430	257	516				278	384	129			0.0123	0.1378	0.0241	0.0388	0.2136	0.0623	0		0	0.0232	0.0321	0.0109	0	0	15.05	46.9859
	314 - L2	12.6715	48.11	8.9547	7.3782	8.9419	0.1697	0.0863	2.4433	0.2456	0.1587	7.0627	1.3159	0.0404	97.5788	156	191	263	357	87	503	129		256	219	322	128	121	111	0.0807	0.2014	0.1261	0.1688	0.0322	0.0454	0.0131		0.07	0.0253	0.0309	0.0566	0.029	0.0096	20.07	6.6197
	314 - L2	14.1682	50.854	10.1839	8.1363	2.1212	0.0256	0.1015	2.3025	0.2677	0.1585	7.9471	1.4379	0.0381	97.7424	157	185	243	340	73	501	125		216	220	323	127	118	108	0.0875	0.2118	0.1379	0.1826	0.012	0.0422	0.0132		0.0667	0.0259	0.0309	0.0604	0.0309	0.0094	25.08	1.5703	0	0
	314 - L2	14.1499	50.5977	10.2045	8.194	2.0248	0.0199	0.1163	2.4428	0.2822	0.1465	7.9529	1.4366	0.041	97.6091	156	187	243	358	73	501	122		193	227	326	121	116	108	0.0874	0.2109	0.1381	0.1839	0.0117	0.0421	0.0134		0.0689	0.0267	0.0308	0.0604	0.0308	0.0094	30.1	1.4989	0.045469	0.0403177
	314 - L2	14.256	51.3124	10.1026	8.2518	1.9005	0.0333	0.1035	2.1394	0.2865	0.1504	7.941	1.4253	0.0433	97.9461	153	192	254	348	73	496	118		221	221	313	122	119	108	0.0878	0.2134	0.1373	0.1848	0.0113	0.042	0.0128		0.0638	0.0264	0.03	0.0603	0.0307	0.0094	35.12	1.407	0.103993	0.0924238
	314 - L2	14.1563	50.9568	10.1287	8.1613	1.7707	0	0.0898	2.483	0.2856	0.1246	7.9889	1.4268	0.0425	97.6151	158	186	246	340	72		128		197	217	329	126	119	108	0.0875	0.2122	0.1374	0.1831	0.0109	-0.0001	0.0131		0.0697	0.0261	0.0306	0.0606	0.0308	0.0094	40.13	1.3108	0.165255	0.147517
	314 - L2	14.3471	51.1515	10.1882	8.2054	1.656	0.02	0.1028	2.2191	0.2792	0.1341	7.9884	1.437	0.0399	97.7688	154	189	264	350	72	492	118		217	214	320	131	114	109	0.0882	0.2129	0.1382	0.1841	0.0106	0.0414	0.0128		0.0652	0.0258	0.0301	0.0606	0.0308	0.0094	45.15	1.2259	0.219321	0.196883
	314 - L2	14.3531	51.0793	10.1749	8.2717	1.5643	0	0.1079	2.0837	0.2695	0.1452	8.0031	1.4339	0.0442	97.5309	158	191	250	348	72		119		219	227	333	129	119	107	0.0883	0.2126	0.1379	0.1852	0.0103	0	0.0131		0.0628	0.0263	0.0314	0.0606	0.0309	0.0093	50.17	1.1581	0.262498	0.236996
	314 - L2	14.3764	51.3535	10.1283	8.2265	1.4634	0.0031	0.119	2.203	0.2714	0.1831	8.037	1.4191	0.043	97.8266	153	194	249	337	72	499	114		221	222	290	123	116	108	0.0883	0.2136	0.1375	0.1843	0.01	0.0416	0.013		0.065	0.0261	0.0293	0.0607	0.0306	0.0094	55.18	1.0834	0.310068	0.282099
	314 - L2	14.364	51.291	10.1357	8.1496	1.3537	0.0066	0.1187	2.3079	0.2796	0.164	7.929	1.4092	0.0422	97.5512	153	186	255	360	72	503	110		203	225	313	125	116	107	0.0883	0.2134	0.1376	0.1832	0.0097	0.042	0.0128		0.0666	0.0265	0.0304	0.0603	0.0304	0.0093	60.2	1.0021	0.361842	0.332535
	314 - L2	14.4649	51.5067	10.152	8.1673	1.2539	0	0.105	2.2874	0.2811	0.1568	7.984	1.4162	0.0388	97.8144	158	185	263	360	71		116		204	229	317	130	117	108	0.0888	0.2141	0.1379	0.1835	0.0094	0	0.0127		0.0662	0.0267	0.0305	0.0606	0.0305	0.0094	65.22	0.9283	0.408839	0.379826
	314 - L2	14.6033	51.5473	10.1216	8.2204	1.1782	0.014	0.1141	2.2438	0.291	0.1619	7.9701	1.4088	0.0343	97.9089	152	187	249	342	71	494	117		203	224	308	127	119	108	0.0893	0.2143	0.1374	0.1842	0.0092	0.0414	0.0131		0.0654	0.0267	0.03	0.0605	0.0305	0.0093	70.23	0.8722	0.444565	0.416935
	314 - L2	14.5656	51.667	10.098	8.1253	1.0762	0	0.1019	2.2757	0.3029	0.1565	7.9358	1.4049	0.0399	97.7497	154	189	257	342	71		117		204	216	307	124	118	107	0.0891	0.2148	0.1373	0.1825	0.0089	0	0.0128		0.066	0.0265	0.0298	0.0603	0.0304	0.0093	75.25	0.7967	0.492645	0.468784
	314 - L2	14.5489	51.5817	10.0643	8.1052	0.9889	0.0123	0.1071	2.2525	0.2912	0.1814	8.0618	1.3876	0.0334	97.6162	159	184	259	358	71	493	111		200	225	302	125	119	109	0.0891	0.2144	0.137	0.1824	0.0086	0.0413	0.0125		0.0655	0.0268	0.03	0.0608	0.0301	0.0094	80.26	0.7321	0.533783	0.515232
	314 - L2	14.6839	52.0304	10.1327	8.238	0.9191	0	0.1083	2.1047	0.3174	0.159	8.0244	1.4183	0.0356	98.172	156	184	248	349	71		113		201	207	313	133	116	108	0.0897	0.216	0.1375	0.1847	0.0084	0	0.0127		0.0627	0.0264	0.0303	0.0608	0.0305	0.0093	85.28	0.6804	0.566707	0.554067
	314 - L2	14.5721	51.739	10.0644	8.1975	0.8657	0.008	0.1064	2.0218	0.2839	0.162	7.9452	1.4281	0.037	97.431	157	189	265	337	70	493	116		206	218	318	134	117	107	0.0892	0.215	0.1371	0.1838	0.0083	0.0412	0.0128		0.0613	0.0262	0.0307	0.0605	0.0307	0.0093	90.3	0.6409	0.591861	0.5849
	314 - L2	14.7591	51.682	10.1144	8.2236	0.7903	0	0.0926	2.2645	0.2986	0.1458	7.9538	1.4052	0.0432	97.7731	151	192	252	340	71		115		193	220	320	134	117	107	0.0899	0.2149	0.1374	0.1843	0.0081	0	0.0124		0.0656	0.0267	0.0304	0.0606	0.0304	0.0093	95.31	0.585	0.62746	0.630545
	314 - L2	14.6441	51.953	10.1777	8.1491	0.7241	0	0.1056	2.2139	0.2978	0.1515	7.8815	1.4361	0.0411	97.7755	156	188	253	340	71		115		207	216	317	132	118	107	0.0895	0.2158	0.138	0.183	0.0079	0	0.0127		0.0649	0.0264	0.0303	0.0602	0.0309	0.0093	100.33	0.536	0.658664	0.672832
	314 - L2	14.6778	51.8622	10.0735	8.2096	0.6797	0	0.1021	2.2575	0.3089	0.1506	7.9261	1.4177	0.0416	97.7073	152	191	255	323	70		112		207	219	324	130	117	108	0.0896	0.2155	0.137	0.1838	0.0077	0	0.0124		0.0657	0.0269	0.0309	0.0604	0.0306	0.0094	105.35	0.5032	0.679552	0.702537
	314 - L2	14.7786	51.8438	10.157	8.1689	0.6495	0.0054	0.106	2.1259	0.2848	0.1521	7.9563	1.4204	0.038	97.6866	157	192	251	338	70	497	118		203	237	321	127	116	108	0.0901	0.2154	0.1378	0.1833	0.0077	0.0415	0.0129		0.0632	0.0273	0.0307	0.0604	0.0306	0.0094	110.36	0.4808	0.693816	0.723556
	314 - L2	14.7151	52.0016	10.1391	8.1738	0.6069	0	0.1278	2.0889	0.3044	0.1679	7.9051	1.4175	0.0382	97.6861	160	189	259	344	70		112		200	224	308	127	118	107	0.0898	0.216	0.1377	0.1835	0.0075	0	0.0131		0.0624	0.0271	0.0301	0.0602	0.0306	0.0093	115.38	0.4493	0.713876	0.754245
	314 - L2	14.8262	52.0565	10.1539	8.258	0.5786	0	0.1144	2.1396	0.3026	0.158	7.9175	1.4025	0.0423	97.9499	152	188	246	328	70		115		199	227	331	128	119	107	0.0902	0.2162	0.1377	0.1848	0.0074	0	0.013		0.0634	0.0271	0.0315	0.0603	0.0304	0.0093	120.4	0.4283	0.72725	0.77552
	314 - L2	14.665	51.9171	10.1025	8.1438	0.5543	0	0.1026	2.2866	0.3013	0.1672	7.9575	1.4104	0.0413	97.6497	162	186	250	341	70		110		200	217	310	128	116	107	0.0897	0.2157	0.1372	0.1829	0.0073	0	0.0124		0.0661	0.0266	0.0303	0.0605	0.0304	0.0093	125.41	0.4104	0.738649	0.794224
	314 - L2	14.7394	52.1232	10.1195	8.1893	0.5344	0	0.1156	2.196	0.308	0.1403	7.9872	1.4112	0.0382	97.9021	150	189	262	352	70		115		204	233	323	122	119	108	0.0898	0.2164	0.1376	0.1838	0.0073	0	0.013		0.0645	0.0277	0.0305	0.0605	0.0305	0.0094	130.43	0.3956	0.748074	0.81012
	314 - L2	14.7374	52.0332	10.1909	8.1393	0.5125	0	0.1168	2.205	0.3027	0.1636	7.9602	1.3991	0.0358	97.7964	158	185	260	344	70		110		198	230	312	124	116	108	0.0899	0.2161	0.1382	0.1828	0.0072	-0.0001	0.0127		0.0646	0.0273	0.0303	0.0604	0.0302	0.0093	135.45	0.3794	0.75839	0.828003
	314 - L2	14.6512	51.867	10.1525	8.1556	0.4998	0	0.1183	2.2951	0.3168	0.153	7.8983	1.4074	0.0438	97.5589	156	189	246	337	70		109		196	218	327	131	120	106	0.0896	0.2155	0.1377	0.183	0.0072	-0.0002	0.0127		0.0662	0.027	0.0311	0.0603	0.0305	0.0092	140.46	0.37	0.764376	0.838626
	314 - L2	14.8772	52.2639	10.0722	8.2143	0.4897	0	0.1161	2.0985	0.3044	0.1508	7.9297	1.4294	0.0437	97.9897	155	193	252	347	70		111		198	227	309	124	117	107	0.0905	0.2169	0.137	0.1842	0.0072	0	0.0128		0.0626	0.0272	0.0298	0.0603	0.0308	0.0093	145.48	0.3625	0.769152	0.84724
	314 - L2	14.8507	51.8955	10.1971	8.186	0.4825	0	0.0994	2.1982	0.2989	0.1523	7.8633	1.4203	0.04	97.6841	155	190	258	350	69		119		212	230	318	125	117	107	0.0904	0.2156	0.1383	0.1838	0.0071	0	0.0128		0.0647	0.0272	0.0304	0.0601	0.0306	0.0093	150.5	0.3572	0.772528	0.853404
	314 - L2	14.7498	52.0764	10.2213	8.1714	0.4792	0	0.1081	2.1868	0.2899	0.1715	7.949	1.4412	0.043	97.8875	154	190	250	348	70		119		200	219	301	126	115	107	0.0899	0.2163	0.1384	0.1835	0.0072	0	0.013		0.0643	0.0264	0.0297	0.0604	0.0309	0.0093	155.51	0.3547	0.77412	0.856334		m=1/(4 Dt)^0,5 [microns^(-1)]=
	314 - L2	14.9514	52.2578	10.2397	8.203	0.4732	0	0.0959	2.0923	0.3009	0.1927	7.9719	1.4208	0.0405	98.2402	154	190	261	340	70		120		199	221	299	129	119	107	0.0908	0.2169	0.1387	0.1839	0.0071	0	0.0128		0.0625	0.0268	0.0301	0.0605	0.0307	0.0093	160.53	0.3503	0.776922	0.861527
	314 - L2	14.8765	52.0163	10.1324	8.2406	0.4694	0	0.1216	2.1853	0.2918	0.1482	7.9574	1.4111	0.0403	97.891	157	186	246	344	70		104		219	237	318	125	121	107	0.0905	0.216	0.1375	0.1847	0.0071	0	0.0125		0.0647	0.0275	0.0303	0.0604	0.0306	0.0093	165.55	0.3475	0.778705	0.864856		D=1/(m^2*4*t) =[cm2/sec]=
	314 - L2	14.8057	52.0563	10.0522	8.154	0.4689	0	0.1078	2.1015	0.3036	0.1701	7.8861	1.4141	0.0473	97.5677	156	188	257	348	70		113		200	230	295	134	119	106	0.0902	0.2162	0.1369	0.1832	0.0071	0	0.0127		0.0627	0.0274	0.0292	0.0603	0.0306	0.0093	170.56	0.3471	0.778959	0.865333
	314 - L2	14.912	52.0399	10.1561	8.2173	0.4668	0.0255	0.0868	2.2065	0.3048	0.1365	7.9081	1.4225	0.0459	97.9285	154	188	247	347	70	484	115		192	233	328	125	116	107	0.0906	0.2161	0.1377	0.1843	0.0071	0.0408	0.0122		0.0644	0.0276	0.0308	0.0602	0.0306	0.0093	175.58	0.3456	0.779915	0.867126
	314 - L2	14.9216	52.275	10.0616	8.1244	0.47	0	0.1134	1.8166	0.2939	0.1374	7.8526	1.4218	0.0441	97.5325	153	191	255	335	70		116		201	217	322	130	116	106	0.0906	0.217	0.1369	0.1825	0.0071	-0.0001	0.013		0.0573	0.0264	0.0303	0.06	0.0306	0.0092	180.6	0.3479	0.77845	0.864379
	314 - L2	14.7677	52.3061	10.1871	8.1314	0.4732	0	0.1168	1.9506	0.3065	0.1491	7.964	1.425	0.0357	97.8133	157	183	260	336	69		113		190	226	323	127	117	108	0.09	0.217	0.1382	0.1826	0.0071	0	0.0129		0.0596	0.0272	0.0307	0.0604	0.0307	0.0093	185.61	0.3503	0.776922	0.861527
	314 - L2	14.9058	52.1255	10.1067	8.2966	0.4694	0.0149	0.12	2.0166	0.2995	0.1324	7.9627	1.4117	0.0433	97.905	152	193	253	340	69	489	110		192	221	338	125	119	107	0.0906	0.2165	0.1373	0.1856	0.0071	0.041	0.0128		0.0609	0.0267	0.0314	0.0604	0.0305	0.0093	190.63	0.3475	0.778705	0.864856
	314 - L2	14.8527	52.2091	10.2134	8.2393	0.4672	0	0.1112	2.0224	0.2917	0.1595	7.9903	1.4435	0.0361	98.0365	162	188	251	339	70		107		202	222	309	120	116	108	0.0904	0.2167	0.1383	0.1846	0.0071	0	0.0124		0.0612	0.0266	0.03	0.0605	0.031	0.0093	195.65	0.3459	0.779724	0.866767
	314 - L2	14.8633	52.1082	10.1552	8.11	0.4615	0.0003	0.1144	2.0525	0.3056	0.1492	7.9488	1.4386	0.0443	97.7519	159	187	254	336	70	492	111		196	229	315	129	115	107	0.0905	0.2164	0.1378	0.1822	0.0071	0.0409	0.0127		0.0616	0.0273	0.0302	0.0604	0.0309	0.0093	200.66	0.3417	0.782398	0.871813
	314 - L2	14.8623	52.1577	10.1848	8.3056	0.4696	0.0057	0.1291	1.9879	0.2865	0.1588	7.9444	1.4232	0.037	97.9527	155	189	251	339	70	489	112		192	226	309	128	116	108	0.0904	0.2165	0.1381	0.1858	0.0071	0.0408	0.0132		0.0604	0.0267	0.03	0.0604	0.0306	0.0093	205.68	0.3477	0.778577	0.864618
	314 - L2	14.8921	52.0781	10.1447	8.2257	0.4742	0	0.1108	2.2157	0.2988	0.174	8.0102	1.4431	0.0452	98.1126	154	185	253	334	70		112		209	222	303	127	117	107	0.0905	0.2162	0.1377	0.1843	0.0071	0	0.0127		0.065	0.0268	0.0299	0.0607	0.031	0.0093	210.7	0.351	0.776476	0.860698
	314 - L2	14.9233	52.2068	10.0812	8.2546	0.4709	0	0.1058	1.9876	0.3032	0.1665	7.9398	1.4354	0.0421	97.9171	156	190	267	351	70		113		191	213	300	125	118	107	0.0907	0.2167	0.1372	0.185	0.0071	0	0.0126		0.0603	0.0263	0.0295	0.0603	0.0309	0.0093	215.71	0.3486	0.778004	0.863546
	314 - L2	14.9414	52.2193	10.2263	8.168	0.4738	0	0.1022	2.1563	0.3082	0.1755	7.9282	1.4116	0.0414	98.1521	154	189	251	344	70		117		199	223	307	135	119	107	0.0907	0.2167	0.1385	0.1833	0.0071	0	0.0127		0.0637	0.0271	0.0303	0.0604	0.0305	0.0093	220.73	0.3508	0.776603	0.860935
	314 - L2	14.8409	51.9661	10.144	8.2124	0.4686	0	0.1089	2.0986	0.2958	0.18	7.9076	1.4312	0.0393	97.6933	157	187	242	342	70		115		213	219	306	125	116	107	0.0903	0.2159	0.1375	0.1841	0.0071	0	0.0128		0.0629	0.0265	0.0303	0.0602	0.0308	0.0093	225.75	0.3469	0.779087	0.865572
	314 - L2	14.8969	52.1903	10.1417	8.1875	0.4772	0	0.1164	2.014	0.3047	0.1596	7.966	1.4212	0.0399	97.9156	156	192	256	328	70		113		200	211	308	123	118	107	0.0906	0.2167	0.1377	0.1835	0.0071	0	0.0129		0.061	0.0263	0.0299	0.0604	0.0307	0.0093	230.76	0.3533	0.775011	0.857981
	314 - L2	14.8424	52.2644	10.1798	8.2963	0.4794	0	0.1184	2.0123	0.3127	0.1646	7.8835	1.4433	0.0398	98.037	155	186	246	351	70		112		197	215	300	119	116	108	0.0903	0.2169	0.1379	0.1858	0.0072	0	0.0129		0.0609	0.0267	0.0295	0.06	0.031	0.0093	235.78	0.3549	0.773992	0.856099
	314 - L2	14.798	52.1366	10.1315	8.2349	0.4783	0	0.114	1.9755	0.3104	0.1755	7.9047	1.4352	0.0458	97.7405	151	187	259	335	70		117		200	211	302	126	120	106	0.0901	0.2164	0.1376	0.1844	0.0071	0	0.0131		0.0603	0.0264	0.0299	0.0602	0.0309	0.0093	240.8	0.3541	0.774502	0.857039
	314 - L2	14.8377	52.1651	10.1318	8.216	0.4785	0	0.0971	1.9191	0.3072	0.1424	7.8639	1.4245	0.0423	97.6257	153	189	251	340	70		120		197	219	336	131	119	108	0.0902	0.2165	0.1375	0.1842	0.0071	0	0.0128		0.0592	0.0268	0.0315	0.0601	0.0307	0.0094	245.81	0.3542	0.774438	0.856922
	314 - L2	14.9228	52.113	10.2104	8.2946	0.4766	0	0.1112	1.7982	0.3157	0.1547	7.9603	1.4367	0.0326	97.8266	155	184	243	339	70		111		201	223	318	127	116	108	0.0906	0.2163	0.1382	0.1856	0.0071	-0.0001	0.0127		0.057	0.0272	0.0305	0.0604	0.0308	0.0093	250.83	0.3528	0.77533	0.858571
	314 - L2	14.8306	52.0583	10.1635	8.2832	0.4725	0.0106	0.1065	1.949	0.2865	0.1527	7.9265	1.4208	0.0393	97.7	154	189	244	333	70	492	119		194	234	309	125	118	107	0.0902	0.2162	0.1378	0.1853	0.0071	0.0411	0.013		0.0597	0.0272	0.0298	0.0603	0.0306	0.0093	255.85	0.3498	0.77724	0.86212
	314 - L2	14.8949	52.1729	10.1741	8.2337	0.4854	0	0.1097	2.1253	0.2896	0.1543	7.9425	1.4357	0.0433	98.0615	151	186	255	339	70		117		189	217	322	122	117	106	0.0905	0.2166	0.138	0.1845	0.0071	0	0.013		0.0629	0.0262	0.0307	0.0603	0.0309	0.0092	260.86	0.3594	0.771127	0.850837
	314 - L2	14.8069	52.1974	10.1351	8.2672	0.48	0	0.1018	2.0009	0.3028	0.1581	7.9804	1.4139	0.0425	97.887	157	190	263	343	70		116		191	218	316	131	120	108	0.0902	0.2167	0.1377	0.1851	0.0072	0	0.0127		0.0606	0.0266	0.0304	0.0606	0.0306	0.0094	265.88	0.3554	0.773674	0.855512
	314 - L2	14.8744	52.0736	10.1018	8.2701	0.4821	0	0.0923	2.1655	0.2962	0.1522	7.9712	1.4288	0.0324	97.9406	156	189	248	349	70		121		198	235	320	127	117	106	0.0905	0.2163	0.1372	0.1853	0.0071	0	0.0128		0.0638	0.0275	0.0306	0.0605	0.0308	0.0092	270.9	0.3569	0.772719	0.853755
	314 - L2	14.9167	52.0218	10.1202	8.2075	0.4746	0	0.1018	1.9616	0.3164	0.1456	7.9129	1.4296	0.0294	97.6383	159	189	258	334	70		117		207	221	310	119	121	108	0.0907	0.2161	0.1375	0.1839	0.0071	0	0.0127		0.0602	0.0271	0.0297	0.0601	0.0309	0.0093	275.91	0.3514	0.776221	0.860224
	314 - L2	14.8935	52.3423	10.1674	8.2508	0.4845	0	0.1168	2.1134	0.2992	0.1697	7.9642	1.4061	0.0383	98.2463	154	184	261	351	70		112		204	232	296	128	119	107	0.0905	0.2172	0.138	0.1849	0.0072	0	0.0128		0.063	0.0273	0.0293	0.0605	0.0304	0.0093	280.93	0.3587	0.771572	0.851653
	314 - L2	14.8778	52.4048	10.1498	8.2396	0.4867	0	0.1224	1.9048	0.3066	0.1363	7.956	1.4345	0.0432	98.0626	157	191	257	337	70		110		209	219	326	126	117	107	0.0905	0.2174	0.1378	0.1846	0.0072	0	0.0128		0.0592	0.0268	0.0306	0.0604	0.0309	0.0093	285.94	0.3603	0.770553	0.849791
	314 - L2	14.7217	52.0577	10.1537	8.1229	0.4804	0	0.0994	2.1458	0.3181	0.1622	7.9273	1.4201	0.0423	97.6517	153	189	248	356	70		110		198	217	311	130	117	107	0.0898	0.2162	0.1377	0.1827	0.0071	0	0.0123		0.0634	0.027	0.0301	0.0604	0.0306	0.0093	290.96	0.3557	0.773483	0.85516
	314 - L2	14.8886	52.2342	10.1385	8.2032	0.4882	0.0089	0.135	1.9368	0.2979	0.1581	7.95	1.437	0.0356	97.912	153	187	255	341	70	488	113		211	234	311	131	117	108	0.0905	0.2168	0.1377	0.184	0.0072	0.0408	0.0134		0.0598	0.0274	0.0301	0.0604	0.0309	0.0093	295.98	0.3614	0.769853	0.848514
	314 - L2	14.9453	52.3235	10.2313	8.2013	0.4798	0	0.1152	1.8581	0.293	0.1449	7.9662	1.4327	0.0431	98.0345	157	188	250	328	70		119		195	231	323	130	118	107	0.0908	0.2171	0.1385	0.1837	0.0072	-0.0001	0.0132		0.058	0.0272	0.0306	0.0605	0.0308	0.0093	300.99	0.3552	0.773801	0.855747
	314 - L2	14.8419	52.4454	10.0882	8.2306	0.487	0	0.0979	1.9564	0.3129	0.1296	7.9097	1.4338	0.0392	97.9725	155	186	258	332	70		115		201	218	338	133	117	107	0.0903	0.2175	0.1372	0.1843	0.0072	0	0.0125		0.06	0.0269	0.0314	0.0603	0.0308	0.0093	306.01	0.3605	0.770426	0.849558
	314 - L2	14.8346	52.2195	10.0677	8.2431	0.4831	0	0.1144	2.1443	0.3025	0.1588	7.9208	1.4207	0.0395	97.9491	159	190	248	347	70		111		203	221	319	125	117	108	0.0903	0.2168	0.1369	0.1847	0.0072	-0.0001	0.0127		0.0635	0.0268	0.0306	0.0603	0.0306	0.0093	311.03	0.3576	0.772273	0.852936
	314 - L2	14.86	52.1545	10.2032	8.2289	0.4843	0	0.1116	1.9998	0.2984	0.1653	7.9502	1.4348	0.0411	97.932	158	186	248	346	70		116		200	227	314	134	117	107	0.0904	0.2165	0.1382	0.1845	0.0072	0	0.0129		0.0608	0.027	0.0305	0.0605	0.0309	0.0093	316.04	0.3585	0.7717	0.851886
	314 - L2	14.8132	52.2306	10.1661	8.232	0.4866	0	0.1014	2.262	0.2954	0.1527	7.9053	1.3956	0.0434	98.0843	156	190	254	333	70		110		214	224	315	126	121	106	0.0902	0.2168	0.1379	0.1844	0.0072	0	0.0123		0.066	0.0268	0.0302	0.0603	0.0303	0.0093	321.06	0.3602	0.770617	0.849907
	314 - L2	14.8188	52.2669	10.2458	8.2591	0.4887	0.0037	0.0978	2.0676	0.2992	0.151	7.9711	1.4418	0.0395	98.151	157	192	249	327	70	493	113		222	219	320	131	114	107	0.0902	0.2169	0.1386	0.1848	0.0072	0.0411	0.0124		0.0625	0.0266	0.0305	0.0605	0.0309	0.0093	326.08	0.3618	0.769598	0.84805
	314 - L2	14.825	52.2565	10.2084	8.2617	0.4823	0	0.1227	2.1716	0.3156	0.1569	7.9751	1.4197	0.0465	98.2421	156	184	254	347	70		114		206	207	312	132	119	107	0.0903	0.2168	0.1383	0.1851	0.0072	0	0.0131		0.0641	0.0263	0.0301	0.0606	0.0306	0.0093	331.09	0.3571	0.772591	0.853521
	314 - L2	14.8374	52.1942	10.1025	8.168	0.4889	0	0.1219	2.2806	0.3105	0.1509	8.038	1.4155	0.0415	98.15	159	187	244	342	70		107		200	225	325	125	118	107	0.0904	0.2167	0.1372	0.1833	0.0072	0	0.0127		0.066	0.0272	0.0309	0.0607	0.0306	0.0093	336.11	0.3619	0.769534	0.847935
	314 - L2	14.8623	52.4158	10.1556	8.2605	0.4883	0	0.1124	2.0346	0.281	0.1561	8.025	1.4352	0.0447	98.2716	153	190	251	345	70		117		194	234	317	130	117	107	0.0904	0.2174	0.1378	0.185	0.0072	0	0.013		0.0613	0.027	0.0305	0.0607	0.0309	0.0094	341.13	0.3615	0.769789	0.848398
	314 - L2	15.052	52.8006	10.0077	8.2804	0.5057	0	0.1173	2.117	0.3064	0.1584	8.0258	1.4296	0.0337	98.8346	155	188	263	335	71		112		208	221	304	121	117	108	0.0912	0.2188	0.1365	0.1853	0.0073	0	0.0129		0.0631	0.0269	0.0296	0.0606	0.0308	0.0093	346.14	0.3744	0.761574	0.83363
	314 - L2	14.79	52.0451	10.2722	8.134	0.4867	0	0.1049	2.0898	0.2906	0.1612	7.9382	1.4094	0.0344	97.7565	157	190	246	347	70		118		205	220	315	126	121	107	0.0901	0.2161	0.1388	0.1828	0.0071	0	0.0129		0.0626	0.0264	0.0304	0.0603	0.0305	0.0093	356.18	0.3603	0.770553	0.849791
	314 - L2	14.8011	52.2657	10.1397	8.3183	0.4831	0.006	0.1073	2.0103	0.3065	0.166	7.9576	1.4215	0.0478	98.0307	156	188	239	341	70	489	111		192	220	310	123	115	106	0.0902	0.2169	0.1375	0.186	0.0071	0.0408	0.0125		0.0608	0.0268	0.0302	0.0604	0.0306	0.0093	361.19	0.3576	0.772273	0.852936
	314 - L2	14.8748	52.1922	10.109	8.1781	0.4883	0	0.1117	2.1533	0.2831	0.1555	7.9038	1.4354	0.0376	97.9229	158	185	249	351	70		114		200	229	313	124	117	108	0.0905	0.2166	0.1373	0.1836	0.0072	-0.0001	0.0128		0.0636	0.0268	0.0301	0.0602	0.0309	0.0093	366.21	0.3615	0.769789	0.848398
	314 - L2	14.8992	52.1255	10.0713	8.2804	0.4753	0	0.1049	1.8123	0.3003	0.1607	7.8855	1.4325	0.0412	97.5889	151	190	255	335	70		117		202	230	301	126	118	107	0.0905	0.2164	0.137	0.1853	0.0071	0	0.0129		0.0572	0.0272	0.0294	0.0601	0.0308	0.0093	371.23	0.3518	0.775966	0.859751
	314 - L2	14.9443	52.121	10.1635	8.2245	0.4832	0	0.0915	2.1122	0.3119	0.1548	7.8772	1.4264	0.0426	97.9532	158	186	259	328	70		111		216	208	314	126	117	107	0.0908	0.2164	0.1379	0.1842	0.0072	0	0.0121		0.0632	0.0263	0.0302	0.0601	0.0307	0.0093	376.25	0.3577	0.772209	0.85282

## Sheet: Dataset S2
	EPMA analyses	Sample PC321
		Oxide																	Det.Lim ppm(A)
	Comment	Na2O	Al2O3	SiO2	K2O	CaO	MnO	FeO	MgO	TiO2	Cr2O3	ZrO2	HfO2	P2O5	Total	Na	Al	Si	K	Ca	Mn	Fe	Mg	Ti	Cr	Zr	Hf	P	O	Distance (µm)	Zr, wt%	1-Cx/Co	erf-1 (1-Cx/Co)
	321-L2	0	0	31.495	0.003	0.01	0	0.108	0.01	0	0.001	64.333	1.303	0	97.263			227	286	300		438	128		139	270	576			0	1.568	0	0
	321-L2	1.963	15.522	51.58	0.32	8.938	0.174	9.204	6.113	1.702	0.018	2.118	0.017	0.217	97.886	215	167	202	237	260	323	371	130	122	111	65	573	113		15.64	1.503	0.0414541	0.0367543
	321-L2	2.096	16.476	53.086	0.45	7.975	0.147	8.679	4.977	1.84	0.013	2.03	0.043	0.242	98.055	216	164	210	221	255	332	355	135	121	110	65	563	116		31.23	1.185	0.24426	0.219967
	321-L2	2.551	15.484	51.472	0.336	9.568	0.141	8.521	7.11	1.614	0.018	1.601	0.011	0.221	98.649	234	165	202	229	262	342	366	131	124	111	64	576	117		46.83	1.069	0.31824	0.289958
	321-L2	3.014	15.412	50.958	0.359	9.618	0.166	8.387	7.146	1.622	0.018	1.444	0	0.207	98.351	218	169	201	225	240	311	365	135	121	111	64		125		62.44	0.984	0.372449	0.343072
	321-L2	3.045	15.316	50.877	0.366	9.549	0.153	8.374	7.188	1.606	0.026	1.33	0.009	0.229	98.068	229	156	206	223	252	337	351	129	124	110	63	567	117		78.04	0.885	0.435587	0.407505
	321-L2	2.547	15.655	51.901	0.349	9.689	0.18	8.554	7.251	1.623	0.014	1.195	0	0.212	99.17	214	159	210	233	246	320	362	138	120	111	63		128		93.65	0.805	0.486607	0.462139
	321-L2	2.683	15.543	51.588	0.317	9.595	0.161	8.493	7.091	1.585	0.018	1.087	0	0.203	98.364	219	170	202	248	254	327	353	135	124	110	63		120		109.25	0.527	0.663903
	321-L2	2.491	15.827	51.956	0.356	9.686	0.15	8.525	7.236	1.593	0.017	0.906	0	0.244	98.987	213	161	201	228	260	345	333	134	118	109	62		118		140.47	0.605	0.614158	0.613191
	321-L2	2.532	15.766	52.144	0.362	9.665	0.155	8.395	7.195	1.59	0.005	0.818	0	0.238	98.866	218	170	205	222	262	321	377	143	123	112	63		124		156.07	0.544	0.653061	0.665065
	321-L2	2.637	15.602	51.83	0.358	9.77	0.145	8.479	7.188	1.594	0.015	0.735	0	0.225	98.579	220	167	201	230	257	336	340	127	121	111	62		125		171.68	0.475	0.697066	0.728435
	321-L2	2.932	14.157	48.461	0.346	9.312	0.139	8.246	6.824	1.446	0.016	0.642	0	0.211	92.731	213	159	201	219	256	327	349	134	116	109	61		114		187.29	0.431	0.725128	0.772097
	321-L2	2.888	15.629	51.478	0.35	9.532	0.139	8.458	7.105	1.581	0.014	0.583	0	0.22	97.979	217	167	203	230	251	335	350	128	120	111	63		115		202.89	0.392	0.75	0.81342
	321-L2	2.704	15.726	52.153	0.327	9.683	0.136	8.493	7.225	1.584	0.015	0.53	0	0.236	98.812	213	167	204	232	255	349	359	129	122	110	62		120		218.5	0.339	0.783801	0.874478
	321-L2	2.493	15.833	52.405	0.366	9.744	0.157	8.569	7.288	1.583	0.02	0.458	0	0.23	99.148	206	171	202	225	255	334	354	130	120	109	62		109		234.11	0.3	0.808673	0.923952
	321-L2	2.447	15.747	52.666	0.352	9.707	0.156	8.477	7.31	1.565	0.018	0.405	0	0.219	99.071	221	167	205	228	271	331	350	132	119	111	62		123		249.71	0.264	0.831633	0.974018
	321-L2	2.581	15.841	52.578	0.353	9.759	0.159	8.427	7.302	1.595	0.016	0.356	0	0.208	99.176	202	167	202	221	261	327	345	129	118	112	61		119		265.32	0.232	0.852041	1.02303
	321-L2	2.646	15.689	52.528	0.348	9.797	0.162	8.507	7.339	1.59	0.023	0.314	0	0.224	99.167	207	163	205	229	249	330	342	134	119	110	61		109		280.93	0.206	0.868622	1.06681
	321-L2	2.269	15.842	52.87	0.356	9.95	0.167	8.604	7.451	1.563	0.022	0.278	0	0.217	99.589	196	172	207	212	245	326	347	131	122	110	62		111		296.54	0.19	0.878827	1.09592
	321-L2	2.4	15.722	52.817	0.348	9.825	0.157	8.438	7.462	1.576	0.028	0.257	0.027	0.209	99.267	207	169	197	220	254	329	355	126	121	109	61	562	115		312.14	0.162	0.896684	1.15187
	321-L2	2.676	15.634	52.364	0.344	9.801	0.158	8.465	7.4	1.564	0.03	0.218	0.006	0.204	98.864	205	164	201	231	256	325	369	130	120	108	62	576	118		327.75	0.145	0.907526	1.1897
	321-L2	2.735	15.414	52.102	0.345	9.92	0.156	8.497	7.45	1.553	0.025	0.196	0	0.183	98.575	207	168	199	231	259	340	351	134	123	110	62		119		343.36	0.132	0.915816	1.22111
	321-L2	2.751	15.468	52.19	0.326	9.886	0.152	8.581	7.495	1.551	0.024	0.178	0	0.207	98.808	222	162	204	234	248	337	339	131	123	111	61		113		358.96	0.123	0.921556	1.24436
	321-L2	2.748	15.409	52.283	0.316	9.916	0.166	8.516	7.561	1.538	0.03	0.167	0	0.2	98.85	192	166	205	228	270	332	360	127	123	110	61		118		374.57	0.119	0.924107	1.25514
	321-L2	2.419	15.508	52.74	0.328	9.929	0.149	8.624	7.608	1.54	0.027	0.161	0	0.194	99.227	212	161	201	224	247	340	348	133	119	110	61		121		390.18	0.111	0.929209	1.27761
	321-L2	2.368	15.408	52.578	0.339	9.951	0.144	8.588	7.668	1.555	0.028	0.15	0	0.202	98.98	205	169	205	225	265	338	339	128	121	112	61		111		405.78	0.095	0.939413	1.32689
	321-L2	2.28	15.462	52.635	0.315	9.87	0.169	8.455	7.675	1.516	0.032	0.129	0	0.21	98.748	194	169	201	238	249	329	352	136	123	110	62		112		421.39	0.088	0.943878	1.35063
	321-L2	2.613	15.32	52.488	0.334	9.94	0.156	8.573	7.651	1.51	0.031	0.119	0	0.208	98.944	208	166	205	219	257	327	366	135	121	111	63		115		437	0.098	0.9375	1.31715
	321-L2	2.33	15.376	52.933	0.337	9.966	0.17	8.572	7.828	1.501	0.032	0.132	0	0.201	99.375	212	170	200	208	247	319	360	138	123	110	61		112		452.6	0.0062	0.996046	2.03774
	321-L1	2.5521	16.292	51.7634	0.3938	8.9517	0.1407	8.3328	5.8616	1.7039	0.0221	0.1283	0	0.146	96.2884	199	162	190	222	252	315	324	130	119	106	71		113		459.15	0.006	0.996173	2.04504
	321-L1	2.5316	14.922	50.9529	0.3202	9.9011	0.1678	8.7109	7.454	1.5205	0.0295	0.1336	0	0.1336	96.7779	197	156	192	226	252	313	340	131	117	106	68		116		469.13	0.0061	0.99611	2.04136
	321-L1	2.6161	14.8177	50.6426	0.2965	9.8853	0.1525	8.5134	7.5723	1.5105	0.0287	0.1237	0	0.1396	96.2991	214	162	186	229	253	320	330	128	117	107	69		115		479.11	0.0061	0.99611	2.04136
	321-L1	2.7296	14.6868	50.6058	0.2925	9.8867	0.1636	8.5777	7.6838	1.4806	0.028	0.1244	0	0.1261	96.3857	195	152	193	227	266	310	346	130	120	107	69		112		489.09	0.0061	0.99611	2.04136		m=1/(4 Dt)^0,5 [microns^(-1)]=		0.0034	"slope"
	321-L1	2.4963	14.5863	50.9994	0.3131	10.0176	0.143	8.5986	7.7177	1.4857	0.0263	0.1118	0	0.1245	96.6203	213	153	187	219	258	323	337	129	118	106	69		109		499.07	0.0061	0.99611	2.04136
	321-L1	2.5305	14.6658	50.9564	0.33	10.0209	0.1537	8.5881	7.7492	1.4707	0.0307	0.1175	0	0.1324	96.7461	203	161	191	223	257	317	332	130	119	107	69		112		509.06	0.006	0.996173	2.04504		D=1/(m^2*4*t) =[cm2/sec]=		3.00365e-08
	321-L1	2.4084	14.4968	51.0507	0.3241	9.9724	0.1688	8.4761	7.7527	1.4915	0.0293	0.1104	0	0.1349	96.416	209	156	189	216	259	300	345	133	116	107	69		112		519.04	0.0061	0.99611	2.04136
	321-L1	2.8702	14.4652	50.2331	0.307	9.9487	0.1566	8.4623	7.6609	1.4786	0.035	0.0991	0	0.1217	95.8384	215	157	194	219	256	314	335	124	118	106	70		111		529.02	0.0061	0.99611	2.04136
	321-L1	2.7853	14.62	50.4478	0.3081	9.9142	0.1655	8.6026	7.7775	1.4903	0.0341	0.1009	0	0.1237	96.37	203	158	188	219	255	318	325	124	116	106	69		107		539	0.0061	0.99611	2.04136
	321-L1	2.8236	14.4475	50.4034	0.3138	9.9515	0.1739	8.4912	7.7357	1.4603	0.0364	0.0986	0.0224	0.1206	96.0788	219	156	193	216	258	301	340	127	118	107	69	487	113		548.98	0.0061	0.99611	2.04136
	321-L1	2.7922	14.5629	50.5652	0.3064	10.0558	0.1466	8.4767	7.6838	1.4977	0.0295	0.0926	0	0.1162	96.3257	206	160	185	221	265	323	343	127	117	108	70		110		558.96	0.0061	0.99611	2.04136
	321-L1	2.3358	14.5997	50.9199	0.3293	9.9797	0.1465	8.575	7.8455	1.476	0.0333	0.1077	0	0.1108	96.459	203	160	190	212	258	315	332	126	118	107	69		117		568.94	0.0061	0.99611	2.04136
	321-L1	2.6837	14.6614	50.9304	0.304	9.95	0.1419	8.5007	7.68	1.4704	0.0213	0.0983	0	0.1092	96.5514	196	155	188	228	262	313	340	126	115	108	70		117		578.93	0.0061	0.99611	2.04136
	321-L1	2.6286	14.4645	50.7161	0.2954	9.9935	0.15	8.5666	7.7883	1.4577	0.0308	0.0941	0	0.1091	96.2948	202	154	193	228	243	319	338	132	118	108	70		121		588.91	0.0061	0.99611	2.04136
	321-L1	2.4164	14.5988	50.7058	0.2944	10.0292	0.1568	8.5763	7.6332	1.4806	0.0337	0.0947	0	0.1084	96.1282	208	153	192	233	256	298	348	133	117	107	70		117		598.89	0.0061	0.99611	2.04136
	321-L1	2.9422	14.5548	50.3706	0.3029	9.9016	0.1664	8.4626	7.66	1.4879	0.0277	0.0967	0	0.1237	96.0971	211	156	184	229	266	316	347	130	117	108	70		109		608.87	0.0061	0.99611	2.04136
	321-L1	2.284	14.5931	50.9624	0.2956	10.0291	0.1744	8.478	7.8659	1.476	0.0295	0.1003	0	0.1202	96.4087	201	155	193	230	227	314	346	126	116	107	70		113		618.85	0.006	0.996173	2.04504
	321-L1	2.6626	14.5902	50.6916	0.326	9.9591	0.1449	8.5246	7.8084	1.4899	0.0247	0.099	0	0.1131	96.4341	197	154	193	210	257	305	343	122	115	108	69		113		628.83	0.0061	0.99611	2.04136
	321-L1	2.8082	14.5992	50.4358	0.3102	10.0347	0.1563	8.5668	7.8113	1.4736	0.0273	0.1061	0	0.1126	96.442	199	158	191	218	252	325	350	119	118	107	69		113		638.81	0.0061	0.99611	2.04136
	321-L1	2.9167	14.5103	50.1816	0.2941	9.9938	0.1313	8.3501	7.7678	1.4587	0.0243	0.1038	0	0.1317	95.8642	194	156	189	234	251	333	330	126	120	108	69		107		648.8	0.0061	0.99611	2.04136
	321-L1	2.7512	14.5434	50.5045	0.2927	9.9681	0.1593	8.4712	7.7205	1.4641	0.031	0.1043	0	0.1178	96.1281	213	149	191	223	254	316	347	128	116	107	70		112		658.78	0.0061	0.99611	2.04136
	321-L1	2.7759	14.4886	50.5844	0.3063	9.9881	0.1795	8.4465	7.8593	1.4723	0.0244	0.1075	0	0.1198	96.3527	208	157	192	219	236	319	341	131	118	108	70		105		668.76	0.0061	0.99611	2.04136
	321-L1	2.7301	14.5324	50.52	0.2892	9.9519	0.1902	8.527	7.7933	1.4804	0.0337	0.1132	0	0.1158	96.2772	203	160	186	237	256	305	327	124	117	106	69		111		678.74	0.0061	0.99611	2.04136
	321-L1	2.7913	14.5104	50.1985	0.3207	9.9609	0.1745	8.4539	7.733	1.4616	0.0315	0.1038	0	0.1087	95.8489	197	155	196	231	249	307	327	127	118	107	70		108		688.72	0.0061	0.99611	2.04136
	321-L1	2.6374	14.5288	50.7727	0.3129	9.9715	0.168	8.5909	7.91	1.4695	0.0353	0.117	0.0026	0.1225	96.639	201	162	191	214	265	316	333	128	115	107	69	499	111		698.7	0.0061	0.99611	2.04136
	321-L1	2.8593	14.4524	49.9355	0.3133	9.9646	0.1583	8.439	7.7541	1.465	0.0314	0.1066	0	0.1371	95.6167	208	157	190	220	253	312	344	129	119	106	70		110		708.69	0.0061	0.99611	2.04136
	321-L1	2.853	14.465	50.0019	0.3082	9.9956	0.1658	8.4433	7.6997	1.48	0.0301	0.1087	0	0.0996	95.6508	220	159	192	228	259	316	354	134	117	107	70		114		718.67	0.0061	0.99611	2.04136
	321-L1	2.7868	14.4756	50.3216	0.3229	9.9444	0.1748	8.4308	7.7678	1.4706	0.0252	0.1115	0	0.1067	95.9388	194	155	190	223	258	294	352	124	120	108	70		121		728.65	0.0061	0.99611	2.04136
	321-L1	2.7868	14.4462	50.2028	0.3029	9.9371	0.1307	8.5187	7.7041	1.4902	0.0257	0.1128	0	0.1201	95.7781	204	156	192	231	236	327	324	130	115	108	69		107		738.63	0.0061	0.99611	2.04136
	321-L1	2.6841	14.385	50.2292	0.3063	9.9627	0.1472	8.5293	7.7395	1.4813	0.0276	0.1101	0.0302	0.1032	95.7357	200	157	194	222	242	314	332	134	118	108	70	489	114		748.61	0.0061	0.99611	2.04136
	321-L1	2.7073	14.5478	50.1022	0.2981	9.9165	0.1502	8.4534	7.7327	1.4711	0.0298	0.1148	0.0201	0.1194	95.6635	212	159	194	222	253	320	348	128	115	106	70	487	121		758.59	0.0061	0.99611	2.04136
	321-L1	2.5681	14.3876	49.4042	0.2977	9.9483	0.1667	8.4099	7.5501	1.4744	0.0365	0.117	0	0.1193	94.4797	195	155	186	220	263	314	355	125	120	106	70		108		768.57	0.0061	0.99611	2.04136
	321-L1	2.666	14.5248	50.1196	0.3242	10.0054	0.148	8.5918	7.6949	1.4605	0.0336	0.1149	0	0.1162	95.8	199	161	187	214	249	320	344	132	118	107	70		112		778.56	0.0061	0.99611	2.04136
	321-L1	2.7399	14.4901	50.239	0.3187	9.9922	0.1734	8.457	7.7646	1.4894	0.0351	0.1186	0	0.1039	95.922	202	159	186	219	243	306	338	129	119	106	70		118		788.54	0.0061	0.99611	2.04136
	321-L1	2.752	14.4731	50.2207	0.3027	10.0543	0.1675	8.4729	7.695	1.4876	0.0284	0.117	0	0.096	95.8674	199	156	191	219	247	302	344	134	116	108	70		123		798.52	0.0061	0.99611	2.04136
	321-L1	2.6059	14.4815	50.3468	0.2996	9.8662	0.1665	8.4867	7.7366	1.4723	0.0339	0.1194	0	0.1131	95.7285	204	155	194	230	248	307	332	124	119	106	70		105		808.5	0.0061	0.99611	2.04136
	321-L1	2.7469	14.4328	49.8558	0.3185	9.955	0.1644	8.4786	7.7181	1.4598	0.0257	0.1169	0	0.0933	95.3657	204	157	187	230	250	311	334	125	118	108	70		121		818.48	0.0062	0.996046	2.03774
	321-L1	2.6811	14.0876	48.7121	0.2984	9.8683	0.1482	8.3432	7.5647	1.4536	0.0357	0.1404	0.0253	0.1007	93.4594	209	157	191	223	258	321	358	129	117	106	70	489	116		828.46	0.0062	0.996046	2.03774
	321-L1	2.585	14.4759	50.3116	0.3014	9.964	0.149	8.4887	7.7705	1.4773	0.0151	0.1121	0	0.117	95.7675	214	156	192	230	246	313	337	128	117	108	70		104		838.44	0.0061	0.99611	2.04136
	321-L1	2.5624	14.4337	50.2083	0.3099	9.9916	0.1529	8.5428	7.8543	1.4724	0.0307	0.1167	0	0.1142	95.7901	202	156	189	217	259	317	328	123	115	107	70		106		848.43	0.0061	0.99611	2.04136
	321-L1	2.6378	14.3969	50.1771	0.2922	9.9559	0.1538	8.5155	7.7066	1.4672	0.0316	0.1185	0	0.1067	95.5598	206	160	193	230	261	309	344	135	119	107	70		118		858.41	0.0061	0.99611	2.04136
	321-L1	2.6176	14.4244	49.9604	0.3072	9.9034	0.1332	8.4527	7.6997	1.4687	0.0332	0.1157	0	0.1174	95.2337	223	157	191	227	239	326	342	131	119	106	70		108		868.39	0.0062	0.996046	2.03774
	321-L1	2.7632	14.3903	49.8773	0.2841	9.9317	0.1804	8.4029	7.768	1.4836	0.0301	0.1253	0	0.1015	95.3383	211	156	190	242	260	302	353	125	115	106	70		112		878.37	0.0061	0.99611	2.04136
	321-L1	2.6219	14.3575	49.734	0.2929	9.8386	0.1589	8.4363	7.7288	1.4773	0.0318	0.1168	0	0.111	94.9059	193	157	189	222	263	316	346	132	117	107	70		108		888.35	0.0061	0.99611	2.04136
	321-L1	2.567	14.4088	50.1249	0.2867	9.8439	0.1538	8.4654	7.7743	1.4588	0.0307	0.1249	0	0.1051	95.3443	192	149	195	235	253	321	357	132	116	107	70		104		898.33	0.0061	0.99611	2.04136
	321-L1	2.7674	14.3913	49.6886	0.3181	9.8458	0.1412	8.4948	7.7042	1.466	0.0355	0.1164	0	0.1055	95.0749	205	159	191	226	250	330	353	124	121	108	69		116		908.31	0.0061	0.99611	2.04136
	321-L1	2.7186	14.3339	49.6152	0.306	9.8916	0.1789	8.4574	7.7562	1.4494	0.0289	0.1216	0	0.0877	94.9454	208	159	188	236	240	312	335	124	121	107	69		118		918.3	0.0061	0.99611	2.04136
	321-L1	2.7692	14.351	49.6147	0.3079	9.8527	0.163	8.3894	7.7209	1.4727	0.0272	0.1164	0	0.0984	94.8835	193	159	191	219	243	306	346	130	117	107	70		115		928.28	0.0061	0.99611	2.04136
	321-L1	2.708	14.3123	49.7918	0.313	9.8485	0.1663	8.5571	7.7294	1.472	0.0346	0.1108	0	0.1107	95.1544	200	157	189	225	260	318	357	126	118	106	70		116		938.26	0.0061	0.99611	2.04136
	321-L1	2.4907	14.3153	50.1751	0.2994	9.9291	0.1507	8.5479	7.7829	1.4653	0.0344	0.117	0	0.0984	95.4064	214	159	193	227	265	322	345	127	119	106	69		111		948.24	0.0061	0.99611	2.04136
	321-L1	2.6906	14.3576	49.6841	0.3057	9.784	0.1504	8.5199	7.6362	1.4587	0.0263	0.1153	0	0.1	94.8287	194	158	191	221	248	322	342	129	116	107	69		114		958.22	0.0061	0.99611	2.04136
	321-L1	2.688	14.3345	49.5745	0.3144	9.9098	0.1576	8.3982	7.7055	1.4594	0.0343	0.1202	0	0.1098	94.8063	220	158	192	218	257	322	366	134	117	107	69		114		968.2	0.0061	0.99611	2.04136
	321-L1	2.5785	14.321	50.0812	0.3044	9.902	0.1668	8.5403	7.7756	1.4445	0.0291	0.1234	0	0.1047	95.3716	217	151	188	220	256	311	343	132	117	107	69		115		978.19	0.0061	0.99611	2.04136
	321-L1	2.5926	14.3063	49.9661	0.3243	9.9081	0.1606	8.5048	7.6879	1.4577	0.0353	0.1174	0	0.1122	95.1735	191	157	188	220	253	310	346	126	119	107	70		112		988.17	0.0061	0.99611	2.04136
	321-L1	2.6494	14.228	49.5742	0.2803	9.912	0.1516	8.4159	7.6445	1.4727	0.0336	0.1153	0	0.1237	94.6014	195	158	189	231	253	320	351	132	119	107	69		106		998.15	0.0061	0.99611	2.04136
	321-L1	2.7256	14.1258	49.5482	0.3078	9.9357	0.1691	8.3954	7.598	1.4645	0.0277	0.1155	0	0.1165	94.5298	210	158	190	219	244	303	329	119	119	107	69		112		1008.13	0.0061	0.99611	2.04136
	321-L1	2.7634	14.2769	49.6274	0.3106	9.8718	0.1683	8.4219	7.6764	1.4622	0.0265	0.119	0	0.111	94.8355	204	154	186	214	248	302	357	131	119	108	69		118		1018.11	0.0061	0.99611	2.04136
	321-L1	2.7257	14.1247	49.4841	0.2954	9.8783	0.158	8.414	7.664	1.4715	0.0317	0.1177	0.0011	0.1122	94.4782	216	155	190	222	251	311	352	132	118	107	70	495	111		1028.09	0.0061	0.99611	2.04136
	321-L1	2.638	14.4206	50.3212	0.2837	9.8527	0.142	8.4426	7.772	1.478	0.031	0.1276	0	0.1052	95.6147	207	156	191	227	259	325	353	126	118	107	69		108		1038.07	0.0061	0.99611	2.04136
	321-L1	2.6391	14.3743	49.6803	0.291	9.8981	0.1549	8.4598	7.6218	1.4701	0.0421	0.12	0.0029	0.1126	94.8671	210	158	189	224	258	308	340	127	117	106	70	494	110		1048.06	0.0061	0.99611	2.04136
	321-L1	2.7352	15.0365	51.6509	0.3113	9.9806	0.15	8.574	7.7179	1.4777	0.0322	0.1199	0	0.1112	97.8974	210	159	190	231	244	325	336	126	120	107	69		108		1058.04	0.0061	0.99611	2.04136
	321-L1	2.732	14.3592	50.2086	0.3166	9.939	0.174	8.5508	7.6642	1.4677	0.0262	0.1187	0	0.0846	95.6416	204	158	190	222	263	312	342	128	118	107	70		118		1068.02	0.0061	0.99611	2.04136
	321-L1	2.7696	14.8524	51.5429	0.3073	10.0394	0.1608	8.4406	7.7222	1.4782	0.0324	0.1236	0	0.1163	97.5858	204	156	187	215	259	319	349	130	120	107	70		108		1078

## Sheet: Dataset S3
	EPMA analyses	Sample PC325
		Oxide																	Det.Lim ppm(A)
	Comment	Na2O	Al2O3	SiO2	K2O	CaO	MnO	FeO	MgO	TiO2	Cr2O3	ZrO2	HfO2	P2O5	Total	Na	Al	Si	K	Ca	Mn	Fe	Mg	Ti	Cr	Zr	Hf	P	O	Distance (µm)	Zr, wt%	1-Cx/Co	erf-1 (1-Cx/Co)
	325-L2	0	0.0161	31.7094	0	0.0821	0.0154	0.3024	0.004	0	0.0039	64.0738	1.298	0	97.5051		154	228		285	406	428	133		139	271	591			0	47.434
	325-L2	2.2196	14.0375	50.4879	0.2725	10.3118	0.169	6.9069	8.015	1.4873	0.0533	3.7571	0.0851	0.1783	97.9813	244	170	202	236	255	344	368	129	122	112	67	568	112		20.01	2.7814	0	0
	325-L2	1.9218	14.2401	51.0884	0.2835	10.2286	0.1788	6.9651	8.0112	1.4699	0.0449	3.3519	0.0516	0.1566	97.9925	229	159	204	221	253	337	350	128	123	112	67	577	134		40.02	2.4814	0.107859	0.0958809
	325-L2	2.2854	14.4459	50.7988	0.289	10.209	0.1666	6.8966	8.0131	1.4539	0.0509	2.8681	0.0168	0.1767	97.6708	239	167	201	235	260	339	347	136	123	112	65	579	119		60.04	2.1232	0.236643	0.212893
	325-L2	1.6795	14.5001	51.7848	0.2937	10.2031	0.1642	6.9194	8.049	1.4517	0.0477	2.4791	0.0185	0.1682	97.7591	226	169	204	235	255	331	352	135	121	111	65	572	119		80.05	1.8353	0.340152	0.311214
	325-L2	1.8691	14.7439	52.0653	0.2749	10.2965	0.1564	6.9059	8.0665	1.4443	0.0403	2.0376	0.0432	0.196	98.1399	221	160	205	238	251	324	359	135	123	111	65	556	114		100.06	1.5084	0.457683	0.43085
	325-L2	2.677	14.7251	51.3988	0.3052	10.2596	0.1583	6.7558	8.0499	1.4219	0.048	1.6589	0	0.1913	97.65	224	162	200	227	262	323	352	131	120	110	64		120		120.07	1.2281	0.55846	0.544186
	325-L2	2.6422	14.8155	51.6585	0.3179	10.2337	0.1797	6.7556	8.0361	1.4228	0.0526	1.336	0	0.195	97.6454	220	167	205	232	263	317	351	131	121	111	63		114		140.09	0.989	0.644424	0.653244
	325-L2	1.7836	15.0169	52.6261	0.3247	10.2574	0.1826	6.8898	7.9835	1.4458	0.0435	1.0947	0	0.1814	97.8299	222	170	202	211	266	322	363	128	122	111	63		117		160.1	0.8104	0.708636	0.746092
	325-L2	2.4311	15.0178	52.2733	0.3059	10.3756	0.1949	6.8035	8.0205	1.4259	0.048	0.8699	0	0.2189	97.9852	221	166	204	236	249	310	339	129	123	110	62		107		180.11	0.644	0.768462	0.845987
	325-L2	2.6891	15.04	52.1807	0.3201	10.2088	0.1367	6.8279	7.999	1.414	0.039	0.6777	0.0021	0.1809	97.716	197	163	207	235	267	350	340	133	122	111	62	566	112		200.12	0.5017	0.819623	0.947237
	325-L2	1.972	15.3148	53.143	0.3229	10.3166	0.1652	6.8192	8.0492	1.4532	0.0397	0.5388	0	0.203	98.3376	198	165	201	226	250	335	359	128	124	111	62		110		220.13	0.3989	0.856583	1.03463
	325-L2	2.0033	15.3146	53.2285	0.3009	10.3685	0.1582	6.891	8.0219	1.4448	0.0486	0.423	0	0.1864	98.3897	185	164	197	240	243	334	338	132	122	110	62		112		240.15	0.3132	0.887395	1.12189
	325-L2	2.3069	15.2104	52.7879	0.319	10.4345	0.1643	6.8655	8.069	1.4459	0.0508	0.3331	0	0.186	98.1733	198	156	204	235	247	318	334	134	119	110	61		114		260.16	0.2466	0.91134	1.20385
	325-L2	2.5683	15.2648	52.6452	0.3057	10.294	0.1596	6.763	8.0129	1.4515	0.0428	0.2645	0	0.1857	97.958	204	164	195	238	255	331	360	126	124	111	62		109		280.17	0.1958	0.929604	1.27941
	325-L2	2.6681	15.305	52.7561	0.3046	10.2882	0.1665	6.6885	7.9604	1.4379	0.0454	0.212	0	0.1928	98.0258	219	161	202	233	273	310	360	131	124	111	61		115		300.18	0.1569	0.94359	1.34905
	325-L2	2.0418	15.3934	53.2479	0.3089	10.3345	0.1881	6.8202	8.0199	1.4501	0.0537	0.1812	0	0.2086	98.2483	207	163	201	236	252	318	345	129	121	109	61		116		320.2	0.1341	0.951787	1.39688
	325-L2	2.4085	15.4483	52.8123	0.3234	10.443	0.161	6.8752	8.0669	1.4893	0.0471	0.1553	0	0.2048	98.4351	213	162	199	233	261	334	352	128	121	110	61		110		340.21	0.115	0.958654	1.44253
	325-L2	1.8629	15.4073	53.1756	0.2919	10.2965	0.155	6.8561	8.0171	1.4778	0.0403	0.1406	0	0.1737	97.8948	195	164	201	248	262	342	343	126	123	111	61		111		360.22	0.1041	0.962573	1.47154
	325-L2	2.2712	15.3529	53.0535	0.321	10.312	0.1555	6.8694	8.0558	1.4881	0.0404	0.1202	0	0.1863	98.2262	202	163	200	224	250	326	347	127	119	111	61		117		380.23	0.089	0.968002	1.51634
	325-L2	1.9639	15.4202	53.0919	0.3222	10.4295	0.1621	6.8582	8.1008	1.463	0.0349	0.1148	0	0.1781	98.1397	194	164	201	219	247	329	340	128	121	112	61		111		400.24	0.085	0.96944	1.5293
	325-L2	1.9225	15.2966	53.2529	0.2994	10.2217	0.1724	6.7841	8.0684	1.4835	0.0438	0.0952	0	0.1815	97.8221	207	167	200	243	260	330	341	132	123	109	62		116		420.26	0.0705	0.974653	1.58114
	325-L2	2.1038	15.381	53.0442	0.3144	10.3536	0.1776	6.8165	8.0399	1.4797	0.0451	0.0909	0	0.1952	98.0418	191	163	195	225	265	318	350	129	120	111	61		112		440.27	0.0673	0.975804	1.59382
	325-L2	2.2065	15.3944	53.0624	0.3179	10.2745	0.1447	6.9015	8.0559	1.4956	0.0372	0.0896	0	0.1875	98.1678	194	161	198	227	259	347	346	133	118	111	61		114		460.28	0.0663	0.976163	1.59788
	325-L2	2.0881	15.3088	53.1416	0.3218	10.4193	0.1456	6.8841	8.057	1.5028	0.0443	0.0828	0	0.2054	98.2017	202	165	200	238	260	341	341	130	119	111	61		116		480.29	0.0613	0.977961	1.61906
	325-L2	1.8086	15.3714	53.1277	0.3072	10.3938	0.1382	6.8819	7.9973	1.4921	0.0396	0.0794	0	0.1899	97.8271	198	165	202	231	259	355	339	132	121	111	60		116		500.31	0.0588	0.97886	1.63021
	325-L2	2.2615	15.3706	52.9867	0.3287	10.4199	0.1536	6.8097	8.0944	1.4854	0.0382	0.0703	0	0.1981	98.2171	196	162	203	227	260	335	356	131	119	112	61		109		520.32	0.0521	0.981268	1.66229
	325-L2	2.0037	15.4411	52.888	0.3161	10.3884	0.1624	6.8234	8.0041	1.4913	0.0489	0.0737	0	0.2009	97.8422	202	164	204	226	271	335	352	126	121	110	61		115		540.33	0.0546	0.98037	1.64992
	325-L2	2.6103	15.2955	52.7074	0.3198	10.3609	0.16	6.7361	8.051	1.4839	0.042	0.0632	0	0.1939	98.0241	213	164	201	236	253	337	353	129	122	110	61		112		560.34	0.0468	0.983174	1.69033
	325-L2	1.9901	15.3546	53.1253	0.2999	10.3558	0.1658	6.8856	8.1362	1.4889	0.0473	0.0652	0	0.1879	98.1027	190	167	204	226	241	326	348	129	125	109	61		115		580.35	0.0482	0.982671	1.68266
	325-L2	2.4597	15.3613	52.8619	0.2828	10.3333	0.1687	6.734	8.0373	1.4722	0.0473	0.0571	0	0.2193	98.0348	206	164	201	236	254	327	349	135	121	110	62		108		600.37	0.0423	0.984792	1.71642
	325-L2	2.6072	15.3236	52.8955	0.3043	10.2256	0.1518	6.8269	8.0668	1.4879	0.0459	0.0631	0	0.1838	98.1825	195	161	201	232	259	341	364	129	119	111	61		119		620.38	0.0467	0.98321	1.69088
	325-L2	2.0032	15.3884	53.382	0.3018	10.3522	0.1637	6.773	8.1219	1.479	0.0424	0.0548	0.0062	0.1815	98.2501	192	160	200	232	253	327	355	125	124	111	61	556	119		640.39	0.0406	0.985403	1.72692		m=1/(4 Dt)^0,5 [microns^(-1)]=		0.005486	"slope"
	325-L3	1.9723	15.412	53.5493	0.3198	10.3974	0.1487	6.7457	8.1613	1.4892	0.0473	0.0562	0	0.1873	98.4866	198	167	197	211	257	330	345	128	122	109	61		109		640.39	0.0416	0.985044	1.7207
	325-L3	1.9138	15.4106	53.2927	0.3126	10.4222	0.1733	6.7685	8.0517	1.5044	0.0495	0.0506	0	0.2122	98.1622	194	170	201	222	252	325	357	128	119	109	63		107		660.44	0.0374	0.986554	1.74777		D=1/(m^2*4*t) =[cm2/sec]=		1.53828e-08
	325-L3	2.582	15.3244	52.9442	0.3126	10.2618	0.1462	6.6872	8.0699	1.4881	0.0423	0.0487	0.0051	0.1957	98.1083	205	161	205	224	258	344	354	125	123	111	61	561	116		680.49	0.0361	0.987021	1.7567
	325-L3	2.5491	15.2508	52.7691	0.3132	10.3644	0.1672	6.6712	8.0662	1.4717	0.0501	0.0511	0	0.2005	97.9245	203	163	199	229	260	325	345	130	124	110	61		115		700.54	0.0379	0.986374	1.74441
	325-L3	2.171	15.3789	52.9827	0.3235	10.3615	0.1694	6.7702	8.0899	1.4899	0.044	0.0467	0	0.2038	98.0315	205	169	205	220	251	323	325	130	119	110	62		115		720.59	0.0346	0.98756	1.76735
	325-L3	2.7435	15.379	52.762	0.3117	10.3605	0.143	6.7131	8.0656	1.4783	0.0426	0.0494	0	0.184	98.2326	204	165	193	234	251	339	345	129	121	110	61		117		740.63	0.0366	0.986841	1.75323
	325-L3	1.8336	15.4784	53.5401	0.3034	10.2877	0.158	6.7067	8.1078	1.5105	0.042	0.0415	0	0.1854	98.195	194	164	202	230	257	318	340	125	118	109	62		104		760.68	0.0307	0.988962	1.79712
	325-L3	2.3789	15.3211	53.1263	0.3036	10.326	0.1734	6.6722	8.0493	1.4858	0.0401	0.0476	0	0.1784	98.1026	212	163	204	234	251	332	345	124	121	110	61		123		780.73	0.0353	0.987309	1.76233
	325-L3	2.7248	15.2317	52.8177	0.3304	10.3899	0.1561	6.5761	8.0351	1.4626	0.0327	0.0439	0	0.1904	97.9913	215	160	200	209	255	325	362	129	122	112	61		118		800.78	0.0325	0.988315	1.78299
	325-L3	2.0579	15.4822	53.4598	0.3226	10.3728	0.173	6.6562	8.0688	1.4913	0.0402	0.0504	0	0.222	98.3972	216	162	200	221	263	313	357	129	120	112	61		105		820.83	0.0373	0.986589	1.74845
	325-L3	2.2261	15.4203	53.3733	0.3123	10.345	0.2017	6.6467	7.999	1.4701	0.0471	0.0476	0	0.2015	98.2907	194	165	203	222	262	293	337	133	121	110	61		103		840.88	0.0352	0.987345	1.76304
	325-L3	1.9407	15.3202	53.4495	0.2987	10.3374	0.1451	6.6572	8.017	1.4711	0.0504	0.0432	0	0.1983	97.9287	207	166	204	240	246	346	338	126	125	110	61		111		860.93	0.032	0.988495	1.78684
	325-L3	2.087	15.3509	53.5858	0.3322	10.3901	0.1722	6.6516	8.0053	1.4747	0.0415	0.0452	0	0.1866	98.3232	206	168	197	233	241	323	343	133	122	111	61		109		880.98	0.0335	0.987956	1.77543
	325-L3	2.3058	15.2972	53.4981	0.3055	10.2744	0.1668	6.6319	7.9691	1.4599	0.0398	0.042	0.0041	0.1758	98.1705	187	169	194	233	258	332	334	129	123	110	61	555	114		901.03	0.0311	0.988819	1.79391
	325-L3	2.7139	15.263	53.0983	0.2881	10.3675	0.1449	6.559	8.0305	1.4588	0.0482	0.0464	0.0041	0.1841	98.2068	201	163	204	236	250	337	359	127	120	108	61	560	110		921.08	0.0343	0.987668	1.76954
	325-L3	1.938	15.3232	53.5946	0.3428	10.3027	0.153	6.5803	8.0631	1.4987	0.0483	0.0503	0	0.1729	98.0679	181	165	201	217	258	340	340	132	118	110	61		118		941.12	0.0372	0.986625	1.74913

## Sheet: Dataset S4
	EPMA analyses	Sample PC328
		Oxide																	Det.Lim ppm(A)
	Comment	Na2O	Al2O3	SiO2	K2O	CaO	MnO	FeO	MgO	TiO2	Cr2O3	ZrO2	HfO2	P2O5	Total	Na	Al	Si	K	Ca	Mn	Fe	Mg	Ti	Cr	Zr	Hf	P	O	Distance (µm)	Zr, wt%	1-Cx/Co	erf-1 (1-Cx/Co)
	328-L1	0	0.0099	31.7589	0	0.0567	0	0.2702	0.0035	0	0.0007	64.3786	1.272	0	97.7506		157	221		294		424	133		139	272	592			0	47.6597
	328-L1	2.3163	13.711	49.9131	0.2537	10.0931	0.1653	7.1975	7.932	1.4389	0.0455	4.3736	0.0706	0.1891	97.6998	225	160	202	236	267	327	344	124	127	111	68	577	118		20.28	3.2378	0	0
	328-L1	2.1355	13.9994	50.3139	0.2786	10.1441	0.1569	7.1972	7.8506	1.442	0.0529	3.8663	0.0413	0.1686	97.6471	238	160	198	235	263	344	339	131	124	111	66	573	119		40.52	2.8622	0.116005	0.103171
	328-L1	2.1406	14.1731	50.9555	0.2769	10.1864	0.1704	7.0955	7.885	1.4474	0.0586	3.3567	0.0372	0.1781	97.9614	227	160	202	227	251	320	349	132	126	111	66	564	120		60.76	2.485	0.232504	0.209057
	328-L1	2.4781	14.366	50.8842	0.2908	10.2155	0.1797	7.1205	7.912	1.4171	0.0449	2.8654	0.0329	0.1613	97.9685	244	165	197	236	256	324	339	130	123	112	65	564	124		81.02	2.1213	0.344833	0.315791
	328-L1	2.0701	14.5071	51.6152	0.2952	10.2293	0.1736	7.0746	7.8731	1.4178	0.0481	2.4474	0.0455	0.1877	97.9846	221	160	201	227	261	321	361	128	124	111	65	548	119		101.27	1.8118	0.440423	0.412575
	328-L1	2.643	14.6691	51.4285	0.3079	10.1638	0.1568	7.0571	7.9351	1.4154	0.0492	2.0349	0	0.1572	98.0181	231	160	199	217	247	341	345	133	122	111	64		119		121.52	1.5065	0.534715	0.51631
	328-L1	2.1511	14.8688	52.2183	0.3131	10.2403	0.176	7.1801	7.9464	1.4229	0.0463	1.737	0.0082	0.1751	98.4837	203	160	205	236	245	311	346	134	123	110	64	578	115		141.77	1.2859	0.602848	0.59872
	328-L1	2.7646	14.7816	51.6682	0.2905	10.1643	0.1601	7.0758	7.9628	1.4193	0.0371	1.4435	0.0225	0.1873	97.9777	224	161	200	226	261	331	340	129	120	111	63	565	111		162.03	1.0686	0.669961	0.688747
	328-L1	2.1232	15.0011	52.4957	0.3216	10.176	0.1895	7.0767	7.9116	1.4214	0.0479	1.2264	0	0.1976	98.1886	218	161	202	219	265	301	346	127	122	109	62		111		182.28	0.9079	0.719594	0.763256
	328-L1	2.1686	15.0205	52.557	0.3288	10.1228	0.1331	6.9823	7.9578	1.4244	0.0463	1.0056	0.0164	0.1862	97.9499	200	164	196	215	255	338	349	129	123	110	62	564	115		202.53	0.7445	0.77006	0.848891
	328-L1	2.3276	15.0808	52.1988	0.328	10.2134	0.1731	7.1057	7.9758	1.4079	0.0491	0.8327	0	0.1705	97.8635	211	164	198	215	253	317	356	136	121	110	62		115		222.78	0.6165	0.809593	0.925869
	328-L1	2.584	15.0791	52.5435	0.3133	10.1116	0.167	7.0744	7.9386	1.4137	0.0439	0.6965	0	0.1743	98.1399	204	165	195	230	253	326	350	128	122	110	62		118		243.04	0.5156	0.840756	0.995337
	328-L1	2.0613	15.2304	52.9049	0.3148	10.243	0.1466	6.9851	7.9415	1.4468	0.0407	0.6065	0	0.1797	98.1013	207	156	206	226	263	332	355	135	120	111	62		117		263.29	0.449	0.861326	1.04705
	328-L1	2.1032	15.3011	52.8486	0.3293	10.2039	0.1692	7.1126	7.9259	1.4359	0.0415	0.5117	0	0.2038	98.1868	200	164	197	226	266	340	347	136	122	110	62		110		283.54	0.3788	0.883007	1.1084
	328-L1	2.1737	15.2489	52.8388	0.3208	10.231	0.1528	7.1754	7.9084	1.4547	0.0449	0.4335	0	0.1749	98.1578	190	166	197	237	257	331	354	130	122	109	62		114		303.8	0.3209	0.900889	1.16615
	328-L1	2.6714	15.1667	52.6177	0.3111	10.3391	0.1595	7.0456	7.9492	1.4444	0.044	0.3739	0	0.1853	98.308	204	161	203	220	241	326	362	132	121	110	61		106		324.05	0.2768	0.91451	1.216
	328-L1	1.9008	15.3708	53.3097	0.3169	10.1848	0.1396	7.1014	7.9608	1.4768	0.0419	0.3324	0	0.1811	98.3171	196	156	199	231	249	334	346	122	120	111	61		119		344.3	0.2461	0.923992	1.25464
	328-L1	2.74	15.1822	52.5024	0.3218	10.2238	0.1494	7.0483	7.9994	1.4592	0.0513	0.2892	0.0044	0.1867	98.158	213	162	204	224	271	332	343	124	119	110	61	556	103		364.55	0.2141	0.933875	1.29936
	328-L1	2.073	15.3293	52.9668	0.3138	10.2641	0.1814	7.2022	7.988	1.4624	0.0445	0.2593	0	0.1778	98.2627	188	165	206	231	251	318	351	130	122	109	61		112		384.81	0.1919	0.940731	1.33374
	328-L1	2.1055	15.3163	53.0358	0.3194	10.2343	0.1617	7.0278	7.9493	1.4707	0.0435	0.2276	0.0024	0.2033	98.0976	193	162	202	217	260	331	357	127	122	110	61	557	116		405.06	0.1685	0.947958	1.37376
	328-L1	2.2466	15.272	52.9457	0.2926	10.2939	0.157	7.1649	7.9868	1.4776	0.0369	0.2016	0	0.202	98.2776	198	160	197	231	256	331	346	130	118	111	61		112		425.31	0.1492	0.953919	1.41043
	328-L1	2.755	15.2804	52.2626	0.33	10.2005	0.1822	7.1177	8.0091	1.4623	0.0474	0.1684	0	0.1842	97.9998	223	165	205	215	261	320	346	130	121	108	61		113		445.57	0.1247	0.961486	1.46325
	328-L1	2.5487	15.2106	52.6565	0.2963	10.2473	0.1405	7.0758	8.0027	1.4652	0.0399	0.1537	0	0.1879	98.0252	195	160	200	239	254	334	354	127	123	111	62		117		465.82	0.1138	0.964853	1.48963
	328-L1	2.8639	15.2429	52.2075	0.3119	10.2297	0.1555	7.0655	7.9364	1.4586	0.0452	0.144	0	0.1806	97.8416	213	164	198	229	247	318	359	131	119	109	60		114		486.07	0.1066	0.967076	1.50827
	328-L1	2.1038	15.3469	53.0456	0.315	10.316	0.1486	7.1193	8.0274	1.4863	0.0409	0.1245	0	0.1844	98.2587	192	164	200	232	250	342	344	129	120	110	61		119		506.32	0.0921	0.971555	1.54933
	328-L1	2.9131	15.1716	52.378	0.3042	10.2918	0.1883	7.1003	7.9707	1.463	0.0386	0.1213	0	0.1754	98.1162	203	165	202	230	260	302	357	126	121	111	61		114		526.58	0.0898	0.972265	1.55635
	328-L1	2.0159	15.4495	53.2041	0.3124	10.1827	0.1698	7.1504	7.9837	1.4706	0.0429	0.103	0	0.1603	98.2452	199	168	197	238	262	332	349	127	122	112	61		115		546.83	0.0763	0.976435	1.60099
	328-L1	2.6499	14.2191	51.7451	0.2855	10.1795	0.1377	7.0974	7.8145	1.3538	0.0437	0.1114	0	0.1863	95.824	187	160	193	229	249	331	339	133	121	110	60		108		567.08	0.0825	0.97452	1.57971
	328-L1	2.5031	15.2107	52.9368	0.307	10.3297	0.1803	7.1388	7.9867	1.4766	0.0518	0.0981	0	0.1981	98.4176	197	165	195	237	250	306	344	129	120	109	60		108		587.34	0.0726	0.977577	1.61442
	328-L1	2.2199	15.3757	52.9787	0.2851	10.2737	0.1624	7.2086	7.9961	1.4903	0.0508	0.081	0	0.2017	98.3241	216	164	204	239	256	307	352	129	122	109	61		109		607.59	0.06	0.981469	1.66512
	328-L1	2.7672	15.1588	52.3853	0.324	10.2413	0.1648	7.1183	7.886	1.4695	0.0388	0.0801	0	0.1798	97.8138	200	165	198	222	245	330	357	131	122	110	60		113		627.84	0.0593	0.981685	1.6682
	328-L1	2.1557	15.3488	53.011	0.3295	10.3271	0.1569	7.2465	8.0088	1.4882	0.0442	0.075	0	0.1924	98.3841	187	159	196	218	254	320	347	131	121	110	60		109		648.09	0.0555	0.982859	1.6855
	328-L1	1.9759	15.3445	53.0534	0.3405	10.3655	0.1781	7.1222	7.9902	1.4819	0.0346	0.0736	0	0.1803	98.1407	190	171	199	213	266	316	360	131	119	111	61		123		668.34	0.0545	0.983168	1.69023
	328-L1	2.755	15.2136	52.4981	0.3038	10.2354	0.1625	7.049	7.9796	1.4708	0.0431	0.0633	0	0.1759	97.9501	207	162	202	225	271	320	355	128	120	111	60		114		688.6	0.0469	0.985515	1.72888		m=1/(4 Dt)^0,5 [microns^(-1)]=		0.00414	"slope"
	328-L1	2.1948	15.3548	53.1211	0.3156	10.2789	0.1642	7.1168	8.0098	1.4719	0.0492	0.0543	0	0.1873	98.3188	198	169	202	227	241	321	342	128	122	109	62		116		708.85	0.0402	0.987584	1.76784
	328-L1	2.7893	15.1412	52.4714	0.3065	10.1593	0.1611	7.0664	7.9912	1.4917	0.0437	0.0555	0	0.1864	97.8639	218	163	198	222	250	326	359	124	120	111	60		105		729.11	0.0411	0.987306	1.76228		D=1/(m^2*4*t) =[cm2/sec]=		2.02585e-08
	328-L1	2.1838	15.1852	53.0666	0.2944	10.2848	0.1469	7.115	8.0001	1.4813	0.0429	0.0451	0	0.2091	98.0553	185	166	201	237	259	343	360	129	119	110	62		110		749.36	0.0334	0.989684	1.81377
	328-L1	2.2045	15.3087	53.1702	0.3084	10.2078	0.197	7.1829	7.9954	1.4697	0.0404	0.0432	0.0068	0.1805	98.3156	198	167	199	226	260	304	330	134	121	110	62	557	117		769.61	0.032	0.990117	1.82426
	328-L1	2.8593	15.1706	52.4477	0.3198	10.1923	0.163	7.0295	7.9781	1.4731	0.048	0.0508	0	0.1856	97.9178	198	159	196	229	244	320	343	131	120	109	61		111		789.86	0.0376	0.988387	1.78452
	328-L1	2.0641	15.2451	53.292	0.3087	10.2412	0.1585	7.0775	7.9669	1.484	0.0471	0.0442	0.013	0.1793	98.1217	200	163	198	223	264	326	350	133	126	109	60	558	115		810.11	0.0327	0.989901	1.81897
	328-L1	2.3627	15.2526	52.8038	0.3139	10.2846	0.1669	7.1734	7.9464	1.4688	0.0472	0.037	0	0.1909	98.0482	203	164	202	229	247	326	347	127	122	109	62		115		830.37	0.0274	0.991537	1.86184
	328-L1	2.9498	15.1837	52.5154	0.3158	10.247	0.1376	7.1336	7.9824	1.4847	0.0438	0.0369	0	0.1682	98.199	205	166	200	226	252	341	371	125	120	110	60		118		850.62	0.0273	0.991568	1.86272
	328-L1	2.0965	15.2216	53.1491	0.3069	10.2245	0.161	7.1783	7.9873	1.4803	0.0522	0.0354	0.0116	0.2107	98.1155	206	169	203	240	255	341	334	136	120	109	62	545	103		870.88	0.0262	0.991908	1.87257
	328-L1	2.8046	15.1472	52.5215	0.3313	10.3145	0.1755	7.0789	7.9344	1.458	0.0405	0.033	0	0.1932	98.0325	212	162	200	219	251	308	336	130	123	110	60		109		891.13	0.0245	0.992433	1.88855
	328-L1	2.1627	15.3137	53.3111	0.3243	10.2822	0.1582	7.1548	7.9454	1.4758	0.0439	0.0347	0	0.1801	98.3869	190	159	200	223	270	331	354	130	118	111	61		111		911.38	0.0257	0.992063	1.87717
	328-L1	2.7135	15.2788	52.9752	0.3056	10.2033	0.1778	7.1149	7.9102	1.4619	0.0414	0.0328	0	0.1942	98.4097	213	162	202	230	247	324	333	129	121	111	61		115		931.63	0.0243	0.992495	1.89049
	328-L1	1.891	15.2707	53.3645	0.2985	10.3012	0.1711	6.9952	7.9465	1.4728	0.0464	0.0284	0	0.197	97.9833	205	159	203	228	250	317	330	123	123	110	62		112		951.88	0.021	0.993514	1.92485
	328-L1	2.476	15.2915	53.1519	0.3074	10.2593	0.1618	7.1208	7.9854	1.4798	0.0504	0.0374	0	0.197	98.5189	199	163	200	236	249	309	334	126	121	109	61		112		972.14	0.0277	0.991445	1.85922
	328-L1	2.0926	15.2907	53.618	0.3036	10.1195	0.173	7.0046	7.9763	1.4835	0.043	0.0323	0	0.179	98.316	193	170	203	237	263	322	348	131	120	111	62		113		992.39	0.0239	0.992618	1.89443

## Sheet: Dataset S5
	EPMA analyses	Sample PC332
		Oxide																	Det.Lim ppm(A)
	Comment	Na2O	Al2O3	SiO2	K2O	CaO	MnO	FeO	MgO	TiO2	Cr2O3	ZrO2	HfO2	P2O5	Total	Na	Al	Si	K	Ca	Mn	Fe	Mg	Ti	Cr	Zr	Hf	P	O	Distance (µm)	Zr, wt%	1-Cx/Co	erf-1 (1-Cx/Co)
	332-L1	0	0	31.5988	0.0103	0.0422	0.0169	0.1623	0.0042	0	0	64.2622	1.2134	0	97.3103			228	275	290	403	431	132			269	581			0	47.5734
	332-L1	2.2281	13.4474	49.4492	0.2638	10.2748	0.1312	6.3713	7.9121	1.4437	0.0531	5.3616	0.11	0.1489	97.1953	246	164	202	223	272	361	354	139	126	112	69	564	122		10.81	3.9692	0	0
	332-L1	2.4142	13.6292	49.6492	0.2622	10.2161	0.1714	6.2355	7.8324	1.4496	0.0446	5.0828	0.0775	0.1794	97.244	254	163	209	242	243	329	360	119	123	113	69	574	121		21.61	3.7628	0.0520004	0.0461168
	332-L1	1.909	13.8638	50.3224	0.2701	10.2088	0.1637	6.2049	7.7927	1.4599	0.0465	4.6932	0.124	0.1654	97.2245	240	159	204	234	250	341	358	133	124	113	68	556	123		32.42	3.4744	0.12466	0.11093
	332-L1	1.6384	14.0902	50.6455	0.2806	10.0874	0.1742	6.2187	7.7138	1.4418	0.0449	4.2527	0.0653	0.1542	96.8079	211	164	201	227	273	320	349	133	123	113	68	578	122		43.22	3.1483	0.206817	0.185389
	332-L1	2.2284	14.2138	50.6177	0.2841	10.1777	0.1583	6.3248	7.828	1.4262	0.0426	3.8408	0.0307	0.1853	97.3586	237	159	205	239	262	330	357	136	124	114	67	572	114		54.03	2.8433	0.283659	0.25693
	332-L1	2.4873	14.3557	50.9836	0.2815	10.2477	0.1698	6.199	7.8523	1.4435	0.049	3.4091	0.0376	0.1873	97.7034	225	163	205	235	256	320	352	134	123	112	66	572	119		64.83	2.5238	0.364154	0.334825
	332-L1	2.6756	14.3015	51.1057	0.2984	10.3052	0.1495	6.1442	7.9421	1.4254	0.0449	3.1294	0.053	0.1794	97.7544	224	162	206	246	260	329	358	134	123	112	66	555	127		75.64	2.3167	0.416331	0.387518
	332-L1	2.6133	14.538	51.5661	0.3055	10.2992	0.1572	6.213	7.9644	1.3965	0.0425	2.7704	0.024	0.1692	98.0592	216	159	204	229	262	336	352	125	124	111	65	548	127		86.44	2.0509	0.483296	0.458513
	332-L1	2.8212	14.7224	51.4232	0.31	10.2307	0.1741	6.1308	7.9217	1.423	0.0448	2.4788	0.0446	0.1924	97.9177	232	163	205	229	256	310	344	130	122	110	65	570	111		97.25	1.8351	0.537665	0.519729
	332-L1	2.5155	14.6968	51.8316	0.3071	10.2153	0.1591	6.1501	7.8749	1.4543	0.0474	2.205	0.0185	0.1774	97.653	237	164	201	229	256	338	351	139	118	111	64	567	121		108.05	1.6324	0.588733	0.581006
	332-L1	1.8362	14.9239	52.3712	0.312	10.2611	0.1587	6.2156	7.8558	1.4537	0.0466	1.983	0.0154	0.1841	97.6173	214	165	203	209	262	317	353	132	122	110	65	570	116		118.86	1.468	0.630152	0.634104
	332-L1	2.0413	14.9327	52.1191	0.3009	10.3626	0.157	6.2009	7.8995	1.4414	0.0398	1.7758	0.0124	0.1785	97.4619	212	163	197	225	251	335	355	124	123	112	64	567	118		129.66	1.3146	0.6688	0.687095
	332-L1	2.5003	14.9946	51.9984	0.3169	10.3239	0.1634	6.1897	7.8882	1.4448	0.0418	1.5934	0.0368	0.2009	97.6929	218	165	196	243	257	325	361	131	119	112	63	564	112		140.47	1.1796	0.702812	0.737146
	332-L1	1.8064	15.1259	52.7734	0.3256	10.2468	0.1591	6.1978	7.7241	1.4512	0.0437	1.444	0.012	0.1818	97.4919	214	157	203	227	256	350	364	124	124	111	63	553	115		151.27	1.069	0.730676	0.781085
	332-L1	2.7649	14.9806	52.2692	0.3072	10.3383	0.1608	6.205	7.875	1.4448	0.0445	1.3344	0.0114	0.1963	97.9324	228	160	203	231	260	321	353	129	121	111	62	562	111		162.08	0.9879	0.751109	0.815327
	332-L1	2.2156	15.0691	52.5173	0.3192	10.3974	0.1764	6.1575	7.8933	1.4418	0.0531	1.2184	0	0.1794	97.6386	205	170	205	229	251	335	363	136	122	112	63		115		172.88	0.902	0.77275	0.853813
	332-L1	2.3893	15.1332	52.3182	0.3389	10.2956	0.1574	6.1538	7.9661	1.4479	0.0428	1.1318	0	0.1782	97.5532	203	162	201	214	266	338	357	129	121	112	62		126		183.69	0.8379	0.7889	0.884269
	332-L1	2.5584	15.1959	52.6219	0.3304	10.4513	0.1742	6.3223	7.9893	1.4513	0.0429	1.053	0.031	0.1766	98.3984	214	162	200	225	265	324	350	134	122	111	63	550	118		194.49	0.7795	0.803613	0.913521
	332-L1	2.6473	15.1288	52.253	0.327	10.2568	0.1874	6.1978	7.9717	1.4423	0.0373	0.9983	0.0076	0.1921	97.6473	232	158	200	224	269	321	360	124	124	112	62	554	115		205.3	0.739	0.813816	0.934762
	332-L1	1.9688	15.1991	52.7767	0.3268	10.4159	0.1803	6.2832	7.9617	1.4823	0.0486	0.9344	0.0021	0.1739	97.7539	210	163	200	215	256	314	364	129	119	110	63	564	116		216.1	0.6918	0.825708	0.960634
	332-L1	2.588	15.1715	52.4599	0.3076	10.4361	0.1778	6.201	7.9648	1.4731	0.0483	0.8897	0	0.1747	97.8924	208	167	201	232	263	338	354	126	120	110	62		115		226.91	0.6586	0.834072	0.979632
	332-L1	2.364	15.2464	52.4543	0.3232	10.3629	0.1548	6.1577	7.9447	1.461	0.0484	0.8459	0	0.1788	97.5422	214	163	202	227	260	326	364	135	123	110	62		110		237.71	0.6262	0.842235	0.99888
	332-L1	2.4615	15.3143	52.322	0.3152	10.3779	0.1839	6.2328	8.0114	1.4421	0.0475	0.8023	0.0079	0.1951	97.7138	216	163	202	229	247	314	346	131	123	110	62	569	115		248.52	0.5939	0.850373	1.01883
	332-L1	2.2376	15.3541	52.8495	0.3232	10.466	0.1694	6.2407	7.9192	1.4788	0.0427	0.7671	0.0134	0.1971	98.0587	200	164	195	232	260	327	353	128	119	112	62	557	111		259.32	0.5679	0.856923	1.03551
	332-L1	2.1613	15.3192	52.6762	0.3423	10.3757	0.142	6.2055	7.9808	1.4687	0.0407	0.7322	0	0.2066	97.6513	212	161	202	216	258	342	345	132	122	111	62		107		270.13	0.542	0.863449	1.05271
	332-L1	1.9945	15.4866	53.0111	0.3281	10.3571	0.1716	6.2976	8.0028	1.4609	0.0421	0.7048	0.0024	0.1944	98.0542	210	159	200	223	255	333	363	121	123	111	62	563	114		280.93	0.5218	0.868538	1.06657
	332-L1	2.6734	15.2623	52.5004	0.3177	10.4296	0.1595	6.2687	7.9946	1.4723	0.0468	0.6965	0	0.1984	98.0202	207	160	201	236	265	319	345	130	121	111	62		110		291.74	0.5157	0.870075	1.07084
	332-L1	2.0139	15.3637	53.073	0.3195	10.3611	0.126	6.213	7.9285	1.4584	0.043	0.6914	0	0.1766	97.7678	195	159	209	222	255	343	359	129	120	112	62		115		302.54	0.5119	0.871032	1.07352
	332-L1	2.2839	15.3086	52.9344	0.3252	10.3881	0.1465	6.3025	7.9019	1.4732	0.0396	0.6987	0.0148	0.1932	98.0105	211	162	203	229	257	333	351	125	121	111	62	558	113		313.35	0.5172	0.869697	1.06979
	332-L1	2.0078	15.2687	52.8164	0.3166	10.4049	0.1524	6.2829	7.9176	1.4597	0.0453	0.7163	0.012	0.1931	97.5939	201	168	203	230	255	326	338	126	124	110	62	560	108		324.16	0.5303	0.866396	1.06069
	332-L1	1.7633	15.2485	53.0497	0.3206	10.4269	0.1772	6.2494	7.946	1.4743	0.0421	0.7465	0	0.1964	97.641	206	162	203	227	251	321	339	129	118	111	62		113		334.96	0.5526	0.860778	1.04559
	332-L1	2.0839	15.3138	52.8906	0.3227	10.4316	0.1596	6.2423	7.9399	1.49	0.0423	0.7688	0	0.1915	97.8769	221	159	204	220	264	330	364	130	122	111	62		116		345.77	0.5691	0.856621	1.03473
	332-L1	2.5028	15.2191	52.7773	0.3337	10.3934	0.149	6.2492	7.9749	1.4589	0.0429	0.7969	0	0.1797	98.0777	199	166	194	227	267	330	337	128	123	110	62		116		356.57	0.59	0.851355	1.0213		m=1/(4 Dt)^0,5 [microns^(-1)]=		0.0058	"slope"
	332-L1	1.9764	15.2953	52.907	0.3181	10.2864	0.1683	6.1685	7.7968	1.4766	0.04	0.8096	0	0.1924	97.4354	202	165	199	227	254	322	360	136	118	111	62		104		367.38	0.5993	0.849012	1.01544
																																			D=1/(m^2*4*t) =[cm2/sec]=		8.25737e-08

## Sheet: Dataset S6
	EPMA analyses	Sample PC333
		Oxide																	Det.Lim ppm(A)
	Comment	Na2O	Al2O3	SiO2	K2O	CaO	MnO	FeO	MgO	TiO2	Cr2O3	ZrO2	HfO2	P2O5	Total	Na	Al	Si	K	Ca	Mn	Fe	Mg	Ti	Cr	Zr	Hf	P	O	Distance (µm)	Zr, wt%	1-Cx/Co	erf-1 (1-Cx/Co)
	333-L4	0	0.0156	31.4593	0	0.0522	0.0074	0.2489	0.0044	0	0.008	64.2452	1.2289	0	97.27		150	228		291	411	419	134		138	269	586			0	47.5609
	333-L4	2.5933	14.195	50.4386	0.2734	10.3684	0.16	8.356	8.1441	1.4469	0.0383	2.4488	0.0417	0.1868	98.6913	237	167	208	232	245	333	337	134	120	112	65	577	119		10.09	1.8128	0	0
	333-L4	2.3297	14.3535	51.2318	0.2662	10.2371	0.1632	8.3992	8.2219	1.4449	0.0449	2.2908	0.0301	0.1579	99.1711	230	169	205	234	271	339	352	129	123	111	65	564	119		20.17	1.6959	0.0644859	0.0572115
	333-L4	2.6227	14.322	50.8489	0.2858	10.324	0.1643	8.4217	8.2016	1.4514	0.038	2.0691	0.0212	0.1771	98.9477	220	168	203	230	253	336	360	139	123	112	65	572	125		30.26	1.5318	0.155009	0.138249
	333-L4	2.3797	14.5264	51.1929	0.2837	10.2586	0.1673	8.4932	8.1605	1.4546	0.0462	1.926	0.0048	0.1705	99.0644	204	166	204	223	260	322	358	128	122	111	65	574	115		40.34	1.4258	0.213482	0.191509
	333-L4	2.3008	14.6047	51.5004	0.2921	10.257	0.1432	8.4336	8.1483	1.4295	0.0465	1.7385	0	0.1867	99.0812	237	168	204	226	253	347	360	140	121	110	65		119		50.43	1.287	0.290049	0.262988
	333-L4	2.7046	14.4875	51.2576	0.286	10.1713	0.1363	8.3812	8.2242	1.4371	0.0488	1.57	0.0175	0.1691	98.8912	209	165	205	233	271	346	348	132	121	110	64	565	113		60.51	1.1623	0.358837	0.329564
	333-L4	2.4561	14.6085	51.8598	0.2732	10.31	0.1422	8.3651	8.1955	1.4253	0.0476	1.3938	0	0.1833	99.2604	210	168	202	228	258	339	359	133	121	111	65		116		70.6	1.0319	0.43077	0.402475
	333-L4	2.4021	14.6867	51.6569	0.2895	10.2564	0.1628	8.3523	8.2167	1.4219	0.0425	1.2737	0.0367	0.1878	98.9859	208	167	207	236	258	323	357	138	122	111	63	569	110		80.69	0.9429	0.479865	0.454767
	333-L4	2.8753	14.6574	51.1568	0.2898	10.2583	0.136	8.3478	8.0759	1.4325	0.0458	1.0934	0	0.1835	98.5524	218	166	203	240	256	337	353	139	120	111	63		111		90.77	0.8095	0.553453	0.538239
	333-L4	2.5511	14.8315	51.7952	0.3099	10.3649	0.1805	8.3578	8.2323	1.4096	0.0431	0.9749	0.0103	0.1812	99.2424	228	162	199	218	247	313	345	142	122	111	64	565	108		100.86	0.7217	0.601887	0.597502
	333-L4	2.7104	14.808	51.8008	0.3021	10.3763	0.1502	8.3329	8.1758	1.4347	0.0363	0.8427	0	0.1978	99.168	215	160	200	238	257	329	348	137	119	111	63		113		110.94	0.6239	0.655836	0.668902
	333-L4	2.7399	14.7963	51.7121	0.3045	10.2561	0.1647	8.3417	8.1361	1.4075	0.0436	0.7448	0	0.193	98.8403	207	155	204	234	258	310	336	135	122	111	63		107		121.03	0.5514	0.69583	0.726574
	333-L4	2.7899	14.8295	51.6986	0.3321	10.3691	0.1697	8.1966	8.1406	1.4147	0.05	0.6291	0	0.1766	98.7964	213	168	199	215	256	330	353	127	120	109	63		117		131.12	0.4657	0.743105	0.801689
	333-L4	2.8246	14.895	51.8163	0.2971	10.3942	0.155	8.319	8.2197	1.4074	0.05	0.5502	0	0.1799	99.1084	214	163	201	229	260	332	362	140	121	110	62		119		141.2	0.4073	0.77532	0.858553
	333-L4	2.7071	14.9448	52.075	0.3047	10.4092	0.1598	8.3097	8.1848	1.4264	0.0471	0.4602	0	0.1848	99.2138	218	168	202	227	270	324	346	133	121	110	62		111		151.29	0.3407	0.812059	0.931043
	333-L4	2.4877	15.0293	52.3416	0.3178	10.3705	0.1652	8.3941	8.1886	1.4243	0.0468	0.39	0	0.1958	99.3517	214	162	204	217	259	314	352	128	122	110	63		112		161.37	0.2887	0.840744	0.995307
	333-L4	2.553	15.049	52.2996	0.3042	10.3443	0.1536	8.2814	8.1903	1.4405	0.0387	0.3343	0	0.1911	99.1799	197	161	208	237	262	328	365	130	121	110	62		114		171.46	0.2475	0.863471	1.05277
	333-L4	2.6763	14.9199	50.9371	0.3097	10.4467	0.1683	8.3944	7.9561	1.4383	0.0467	0.2674	0	0.1795	97.7405	211	161	202	227	267	323	351	133	119	110	63		122		181.54	0.1979	0.890832	1.13275
	333-L4	2.8183	14.9954	51.817	0.3198	10.3176	0.1576	8.2644	8.2154	1.4341	0.0435	0.2336	0.0158	0.1866	98.8191	203	167	205	228	243	334	357	124	122	110	62	562	117		191.63	0.1729	0.904623	1.17923
	333-L4	2.461	15.1563	52.4897	0.2918	10.382	0.177	8.3584	8.25	1.4394	0.0493	0.201	0	0.1819	99.4378	208	166	203	238	256	308	352	125	121	110	62		115		201.71	0.1488	0.917917	1.22946
	333-L4	2.2389	15.0927	52.5099	0.3416	10.2949	0.175	8.3165	8.1641	1.449	0.0451	0.1676	0	0.19	98.9852	204	163	203	215	262	327	366	132	117	110	61		110		211.8	0.1241	0.931542	1.28834
	333-L4	2.2907	15.08	52.3486	0.3198	10.4364	0.1591	8.3622	8.2943	1.4549	0.0453	0.1403	0	0.1956	99.127	212	165	199	231	254	336	361	126	120	109	62		115		221.88	0.1039	0.942685	1.34414
	333-L4	2.4361	15.0722	52.4709	0.297	10.3835	0.13	8.3889	8.162	1.4613	0.0471	0.1204	0	0.188	99.1573	207	167	202	232	258	341	362	144	121	110	61		111		231.97	0.0891	0.95085	1.39108
	333-L4	2.3543	15.1717	52.2795	0.3112	10.3244	0.1686	8.3886	8.2303	1.4574	0.0493	0.0996	0	0.1731	99.0081	206	164	201	225	241	320	354	135	121	109	61		118		242.06	0.0738	0.959289	1.44707
	333-L4	2.4628	15.1358	52.4617	0.3018	10.3376	0.1727	8.3042	8.2542	1.4518	0.0463	0.0793	0	0.1829	99.1909	221	165	201	229	257	321	344	131	121	109	61		114		252.14	0.0587	0.967619	1.51298
	333-L4	2.5733	15.1016	51.8994	0.3123	10.3882	0.1632	8.301	8.2519	1.4632	0.0489	0.067	0	0.1811	98.751	202	173	210	225	247	336	363	128	121	109	61		112		262.23	0.0496	0.972639	1.56011
	333-L4	2.3022	15.0568	52.3422	0.3064	10.2905	0.1749	8.3702	8.2994	1.4631	0.0532	0.0577	0	0.1953	98.912	211	160	206	222	257	316	349	132	122	110	61		115		272.31	0.0427	0.976445	1.60111
	333-L4	2.3305	15.0844	52.4632	0.3005	10.3895	0.1721	8.3046	8.3107	1.469	0.0509	0.0491	0	0.19	99.1145	219	171	205	222	254	326	348	140	121	110	61		109		282.4	0.0363	0.979976	1.64465
	333-L4	2.2138	15.1681	52.411	0.3315	10.2772	0.1462	8.3567	8.2875	1.4621	0.0516	0.0494	0	0.1824	98.9374	210	166	200	220	259	331	350	134	119	108	59		112		292.49	0.0365	0.979865	1.6432
	333-L4	2.4772	15.1364	52.3173	0.2956	10.2985	0.1592	8.2998	8.2703	1.4699	0.0446	0.0433	0	0.1897	99.0017	202	166	195	242	254	327	350	134	120	110	60		103		302.57	0.032	0.982348	1.67785
	333-L4	2.3925	15.084	52.309	0.3137	10.3863	0.1584	8.3158	8.301	1.4651	0.0475	0.0316	0	0.1868	98.9918	204	170	203	236	247	320	354	132	121	110	61		107		312.66	0.0234	0.987092	1.75807
	333-L4	2.4234	15.0929	52.3637	0.2839	10.4034	0.1739	8.3637	8.2748	1.47	0.0521	0.0349	0	0.1832	99.1199	208	163	201	239	254	326	346	131	119	109	60		117		322.74	0.0258	0.985768	1.73337
	333-L4	2.2989	15.0906	52.3819	0.3131	10.3393	0.1526	8.3118	8.2557	1.4582	0.0371	0.0281	0	0.1873	98.8546	206	160	208	214	265	344	350	134	121	111	61		114		332.83	0.0208	0.988526	1.78751			m=1/(4 Dt)^0,5 [microns^(-1)]=		0.005784	"slope"
	333-L4	2.6317	15.058	52.1489	0.2894	10.3299	0.1465	8.3044	8.3304	1.4649	0.0502	0.0171	0	0.1832	98.9547	207	167	207	236	278	351	358	124	121	109	62		109		342.91	0.0127	0.992994	1.90676
	333-L4	2.7279	15.0081	52.3338	0.3018	10.3025	0.1692	8.2817	8.3527	1.4613	0.0387	0.026	0	0.1848	99.1886	218	162	202	225	261	318	359	133	120	110	60		117		353	0.0193	0.989353	1.80602			D=1/(m^2*4*t) =[cm2/sec]=		8.30311e-08
	333-L4	2.5454	15.0494	52.1997	0.3121	10.3857	0.1505	8.2362	8.291	1.4561	0.0497	0.0284	0.0058	0.1964	98.9064	191	161	203	218	259	333	366	134	122	108	61	562	113		363.09	0.0211	0.988361	1.78395
	333-L4	2.9253	15.0452	51.7559	0.3044	10.3625	0.181	8.1844	8.2519	1.4753	0.04	0.0144	0	0.1863	98.7266	198	158	200	221	262	310	357	135	120	110	62		112		373.17	0.0107	0.994098	1.94677
	333-L4	2.4753	15.0338	52.4735	0.3095	10.3324	0.1617	8.35	8.301	1.4401	0.0471	0.0165	0	0.1872	99.1282	209	165	203	227	271	343	334	135	124	109	63		112		383.26	0.0122	0.99327	1.9162
	333-L4	2.3583	15.1285	52.3971	0.2946	10.3154	0.1551	8.2932	8.2938	1.471	0.0498	0.0296	0	0.1715	98.9579	208	160	197	232	252	327	354	128	118	110	60		114		393.34	0.0219	0.987919	1.77468
	333-L4	2.3779	15.0402	52.4582	0.3028	10.3545	0.1828	8.2194	8.2949	1.4697	0.0496	0.0309	0	0.1723	98.9532	206	164	204	244	263	316	355	129	121	109	59		117		403.43	0.0229	0.987368	1.7635
	333-L4	2.3387	15.0762	52.4364	0.2783	10.3579	0.1619	8.2753	8.2653	1.4659	0.0484	0.0258	0	0.2054	98.9356	208	160	208	244	255	332	362	141	121	110	60		104		413.51	0.0191	0.989464	1.80858
	333-L4	2.3843	14.9904	52.3471	0.3102	10.3704	0.16	8.3759	8.2853	1.4606	0.0411	0.0252	0	0.2183	98.9689	211	162	198	232	259	334	347	138	122	110	60		112		423.6	0.0187	0.989684	1.81378
	333-L4	2.3001	15.1154	52.4003	0.2931	10.3172	0.1629	8.3356	8.3343	1.4829	0.0483	0.029	0	0.1989	99.018	196	163	201	236	254	329	346	129	119	110	61		115		433.69	0.0214	0.988195	1.78044
	333-L4	2.2733	15.1123	52.6479	0.3158	10.3581	0.1567	8.2751	8.2994	1.447	0.0443	0.0252	0	0.1836	99.1385	205	169	204	229	256	326	348	126	124	111	59		112		443.77	0.0187	0.989684	1.81378
	333-L4	2.1852	15.1233	52.3487	0.3149	10.3528	0.1399	8.3377	8.2601	1.4696	0.0423	0.022	0	0.1703	98.767	191	162	209	230	250	341	347	130	125	110	61		119		453.86	0.0163	0.991008	1.84723
	333-L4	2.3189	15.0325	52.3371	0.2828	10.3922	0.1625	8.3054	8.2561	1.481	0.0489	0.0151	0	0.1884	98.8209	203	166	207	235	279	326	372	135	118	110	63		109		463.94	0.0112	0.993822	1.93618
	333-L4	2.1917	14.991	52.5358	0.3182	10.4004	0.1772	8.2884	8.3413	1.4651	0.0467	0.0176	0	0.1901	98.9634	209	166	202	234	253	324	346	130	122	111	60		115		474.03	0.013	0.992829	1.90126
	333-L4	2.3498	15.0836	52.631	0.28	10.4153	0.1701	8.2708	8.2591	1.4809	0.0458	0.0255	0.0014	0.1889	99.2023	208	164	200	237	251	327	360	129	120	110	61	558	110		484.12	0.0189	0.989574	1.81117
	333-L4	2.2963	14.9886	52.4312	0.3032	10.3312	0.1572	8.3849	8.2693	1.4782	0.0423	0.0218	0.0158	0.1884	98.9084	216	162	207	238	252	339	356	129	120	111	60	557	111		494.2	0.0162	0.991064	1.84871
	333-L4	2.6314	15.0776	52.1981	0.3178	10.3911	0.1562	8.3062	8.273	1.4903	0.0468	0.02	0.0028	0.1863	99.0975	207	167	204	219	265	322	362	136	120	110	60	562	116		504.29	0.0148	0.991836	1.87044
	333-L4	2.9218	14.9566	51.4857	0.3094	10.2781	0.1425	8.1872	8.2198	1.4731	0.0446	0.0158	0	0.1859	98.2207	216	163	208	218	258	340	362	126	121	111	63		113		514.37	0.0117	0.993546	1.926
	333-L4	2.9521	14.9104	51.7207	0.3069	10.3327	0.1869	8.1697	8.1938	1.4493	0.0409	0.0129	0	0.1871	98.4634	197	169	202	230	250	315	364	135	122	111	67		110		524.46	0.0095	0.994759	1.97415
	333-L4	2.8888	14.9621	51.7668	0.304	10.4337	0.142	8.2326	8.2724	1.4799	0.0436	0.0196	0	0.1959	98.7416	206	163	199	231	255	345	359	131	120	110	64		109		534.54	0.0145	0.992001	1.87534
	333-L4	2.4649	15.0918	52.4952	0.3001	10.4067	0.152	8.2078	8.2483	1.4776	0.0455	0.0219	0	0.1654	99.0771	203	165	208	234	255	326	380	129	120	111	60		118		544.63	0.0162	0.991064	1.84871
	333-L4	2.6255	15.0109	52.0201	0.298	10.3017	0.1456	8.2208	8.2426	1.4677	0.0463	0.0182	0	0.192	98.5893	213	165	208	226	266	338	337	124	120	110	61		114		554.71	0.0135	0.992553	1.89233
	333-L4	2.7862	14.9887	51.0251	0.3069	10.4364	0.1741	8.28	8.0325	1.4723	0.0447	0.0202	0	0.2047	97.7717	225	163	196	233	255	327	345	131	119	110	60		116		564.8	0.0149	0.991781	1.86883
	333-L4	2.4606	15.1247	52.5804	0.3107	10.3403	0.1775	8.2337	8.2831	1.4598	0.0417	0.0268	0	0.178	99.2171	229	164	198	224	257	311	363	133	124	110	61		117		574.88	0.0198	0.989078	1.79971
	333-L4	2.256	15.0662	52.3199	0.3001	10.3763	0.1655	8.1897	8.2991	1.4619	0.043	0.0323	0	0.1981	98.7082	193	166	204	227	251	331	347	128	122	110	61		109		584.97	0.0239	0.986816	1.75275
	333-L4	2.355	15.0987	52.4021	0.29	10.3729	0.1579	8.2047	8.3375	1.481	0.0541	0.0252	0	0.1772	98.9562	201	164	201	227	259	326	342	130	120	108	59		125		595.06	0.0187	0.989684	1.81378
	333-L4	2.4045	15.1151	52.2046	0.3122	10.4125	0.1606	8.2524	8.3302	1.4509	0.0478	0.0289	0	0.1904	98.9101	218	166	204	221	243	335	372	133	122	110	60		110		605.14	0.0214	0.988195	1.78044
	333-L4	2.545	14.9493	52.0854	0.3019	10.3449	0.1514	8.2454	8.3338	1.4669	0.0473	0.0283	0	0.1964	98.696	202	166	205	227	257	332	344	138	124	110	60		106		615.23	0.021	0.988416	1.78513
	333-L4	2.3938	15.0247	52.2256	0.2949	10.416	0.1518	8.2857	8.3296	1.4727	0.0487	0.0223	0	0.1872	98.8529	217	166	200	223	259	336	357	139	120	110	61		112		625.31	0.0165	0.990898	1.84428
	333-L4	2.3901	15.0591	52.1138	0.2915	10.4425	0.164	8.2754	8.2613	1.475	0.0443	0.0336	0	0.2093	98.7597	208	162	200	235	247	331	337	135	118	110	59		107		635.4	0.0249	0.986264	1.74238
	333-L4	2.8629	14.7176	51.144	0.2904	10.2126	0.1625	8.1747	8.1751	1.461	0.0399	0.0186	0	0.1875	97.4468	210	164	198	238	258	318	339	138	121	111	62		109		645.49	0.0137	0.992443	1.88885
	333-L4	2.4515	15.0997	52.0507	0.2968	10.3551	0.1259	8.2714	8.3186	1.4781	0.0468	0.0332	0	0.1771	98.705	211	167	195	242	243	352	354	128	122	110	61		116		655.57	0.0246	0.98643	1.74545
	333-L4	2.3506	15.0062	52.4853	0.3086	10.3217	0.1506	8.2938	8.3229	1.472	0.0524	0.034	0	0.1953	98.9935	224	164	201	234	241	330	359	131	121	109	60		106		665.66	0.0252	0.986099	1.73935
	333-L4	2.2753	14.9853	52.0184	0.3	10.3816	0.1717	8.1771	8.2572	1.4665	0.0399	0.0248	0	0.1856	98.2832	203	169	206	220	252	316	358	134	123	112	60		113		675.74	0.0184	0.98985	1.81774
	333-L4	2.2184	15.0301	52.3017	0.29	10.3575	0.1658	8.1982	8.2941	1.4528	0.047	0.0305	0	0.1788	98.5648	202	160	198	233	263	331	371	131	119	110	59		117		685.83	0.0226	0.987533	1.76681
	333-L4	2.4113	15.0209	52.0623	0.301	10.3096	0.1381	8.3252	8.3138	1.4883	0.047	0.0283	0	0.1803	98.6261	201	162	204	242	264	336	346	129	117	109	59		118		695.91	0.0209	0.988471	1.78632
	333-L4	2.335	15.0744	52.1873	0.2871	10.3818	0.1642	8.2	8.2766	1.4737	0.0474	0.0328	0	0.1658	98.6261	199	170	200	241	259	326	331	134	117	110	59		121		706	0.0243	0.986595	1.74856

## Sheet: Dataset S7
	EPMA analyses	Sample PC341
		Oxide														Det.Lim ppm(A)																	StdDev wt%
	Comment	Na2O	Al2O3	SiO2	K2O	CaO	MnO	FeO	MgO	TiO2	Cr2O3	ZrO2	HfO2	P2O5	Total	Na	Al	Si	K	Ca	Mn	Fe	Mg	Ti	Cr	Zr	Hf	P	O	Na	Al	Si	K	Ca	Mn	Fe	Mg	Ti	Cr	Zr	Hf	P	O	Distance (µm)	Zr, wt%	1-Cx/Co	erf-1 (1-Cx/Co)
	341-L1	0	0.01	31.43	0	0.03	0	0.11	0.01	0	0	64.34	1.13	0	97.06		154	226		281	406	427	133		141	268	579			0	0.01	0.19	0	0.02	0.03	0.04	0.01	0	0.01	0.18	0.07	0		0	47.631
	341-L1	2.54	12.97	47.88	0.25	9.69	0.16	7.33	7.58	1.44	0.04	6.18	0.09	0.16	96.32	277	163	199	234	242	345	364	129	125	116	70	566	126		0.07	0.08	0.29	0.03	0.12	0.03	0.12	0.07	0.02	0.01	0.02	0.05	0.01		15.18	4.57507
	341-L1	2.51	12.52	47.24	0.27	9.45	0.11	7.16	7.37	1.36	0.03	7.73	0.14	0.15	96.04	271	168	199	235	254	361	361	128	125	116	72	562	129		0.07	0.08	0.28	0.03	0.12	0.03	0.12	0.07	0.02	0.01	0.03	0.05	0.01		30.36	5.72253	0	0
	341-L1	2.61	12.64	47.17	0.28	9.45	0.18	7.15	7.37	1.38	0.05	7.31	0.1	0.16	95.84	255	166	210	235	261	324	368	135	127	113	72	570	126		0.07	0.08	0.28	0.03	0.12	0.03	0.12	0.07	0.02	0.01	0.02	0.05	0.01		45.55	5.41161	0.0543338	0.0481893
	341-L1	2.61	12.82	47.62	0.26	9.54	0.15	7.28	7.42	1.36	0.04	6.74	0.1	0.14	96.08	265	162	212	233	266	328	367	133	126	114	71	570	128		0.07	0.08	0.29	0.03	0.12	0.03	0.12	0.07	0.02	0.01	0.02	0.05	0.01		60.73	4.98964	0.128072	0.113993
	341-L1	2.68	12.96	47.91	0.27	9.46	0.16	7.21	7.37	1.36	0.04	6.17	0.08	0.16	95.82	271	168	201	248	258	328	361	136	125	114	70	573	125		0.07	0.08	0.29	0.03	0.12	0.03	0.12	0.07	0.02	0.01	0.02	0.05	0.01		75.91	4.56766	0.201811	0.180801
	341-L1	2.73	13.15	48.26	0.28	9.6	0.15	7.13	7.44	1.38	0.05	5.7	0.11	0.15	96.13	264	165	203	218	245	337	358	136	123	113	69	551	129		0.07	0.08	0.29	0.03	0.12	0.03	0.12	0.07	0.02	0.01	0.02	0.05	0.01		91.1	4.21972	0.262613	0.237104
	341-L1	2.76	13.33	48.66	0.29	9.51	0.14	7.2	7.44	1.37	0.05	5.14	0.05	0.18	96.12	255	165	205	227	245	351	354	135	123	114	69	574	121		0.07	0.08	0.29	0.03	0.12	0.03	0.12	0.07	0.02	0.01	0.02	0.05	0.01		106.28	3.80515	0.335058	0.306248
	341-L1	2.81	13.55	48.86	0.29	9.63	0.18	7.2	7.44	1.37	0.05	4.58	0.09	0.17	96.22	253	161	207	244	260	323	354	133	125	112	68	557	126		0.07	0.08	0.29	0.03	0.12	0.03	0.12	0.07	0.02	0.01	0.02	0.05	0.01		121.46	3.39058	0.407503	0.378459
	341-L1	2.84	13.78	49.25	0.32	9.7	0.15	7.25	7.51	1.36	0.05	4.1	0.02	0.16	96.51	241	160	205	225	266	327	373	130	123	113	67	571	125		0.07	0.08	0.3	0.03	0.12	0.03	0.12	0.07	0.02	0.01	0.02	0.05	0.01		136.64	3.03524	0.469599	0.443635
	341-L1	2.82	13.76	49.46	0.29	9.75	0.16	7.11	7.46	1.38	0.04	3.67	0.1	0.16	96.15	238	168	208	233	259	330	369	132	121	113	66	544	127		0.07	0.08	0.3	0.03	0.12	0.03	0.12	0.07	0.02	0.01	0.01	0.05	0.01		151.82	2.71691	0.525226	0.505393
	341-L1	2.86	14.03	49.7	0.3	9.66	0.17	7.08	7.53	1.36	0.03	3.27	0.04	0.19	96.23	244	157	209	233	264	318	361	132	123	114	66	566	110		0.07	0.08	0.3	0.03	0.12	0.03	0.12	0.07	0.02	0.01	0.01	0.05	0.01		167.01	2.42079	0.576973	0.56652
	341-L1	2.95	14.1	49.9	0.32	9.76	0.18	7.27	7.52	1.37	0.05	2.86	0.05	0.17	96.5	241	161	204	219	261	327	345	131	120	111	65	555	111		0.07	0.08	0.3	0.03	0.12	0.03	0.12	0.07	0.02	0.01	0.01	0.05	0.01		182.19	2.11726	0.630013	0.63392
	341-L1	2.9	14.24	49.92	0.32	9.83	0.16	7.14	7.49	1.41	0.05	2.51	0.02	0.17	96.15	238	167	202	231	243	331	354	134	123	112	64	559	114		0.07	0.08	0.3	0.03	0.12	0.03	0.12	0.07	0.02	0.01	0.01	0.05	0.01		197.37	1.85816	0.675291	0.696378
	341-L1	2.93	14.34	50.13	0.29	9.81	0.17	7.23	7.54	1.4	0.05	2.22	0.03	0.18	96.3	236	165	209	244	260	331	350	136	120	112	64	562	120		0.07	0.08	0.3	0.03	0.12	0.03	0.12	0.07	0.02	0.01	0.01	0.05	0.02		212.55	1.64347	0.712807	0.752574
	341-L1	2.96	14.35	50.22	0.31	9.84	0.17	7.28	7.56	1.38	0.04	1.95	0.02	0.18	96.26	218	163	203	236	257	325	340	138	121	112	63	564	124		0.07	0.08	0.3	0.03	0.12	0.03	0.12	0.07	0.02	0.01	0.01	0.05	0.02		227.74	1.44359	0.747736	0.809544
	341-L1	2.91	14.51	50.49	0.34	9.92	0.17	7.25	7.62	1.4	0.05	1.69	0	0.19	96.54	250	167	206	223	258	325	355	139	121	110	63		115		0.07	0.08	0.3	0.03	0.12	0.03	0.12	0.07	0.02	0.01	0.01	0	0.01		242.92	1.25111	0.781371	0.86987
	341-L1	2.95	14.65	50.61	0.32	9.92	0.15	7.28	7.59	1.4	0.04	1.47	0	0.17	96.56	233	167	200	222	259	315	347	137	120	112	62		118		0.07	0.08	0.3	0.03	0.12	0.03	0.12	0.07	0.02	0.01	0.01	0	0.01		258.1	1.08824	0.809832	0.926368
	341-L1	2.97	14.64	50.68	0.32	9.99	0.15	7.25	7.63	1.41	0.04	1.29	0	0.17	96.54	221	165	198	232	244	338	345	130	121	112	62	556	113		0.07	0.08	0.3	0.03	0.13	0.03	0.12	0.07	0.02	0.01	0.01	0.05	0.01		273.29	0.95499	0.833118	0.977428
	341-L1	2.98	14.67	50.74	0.32	9.91	0.15	7.24	7.65	1.42	0.05	1.15	0	0.18	96.45	230	164	209	228	256	329	353	139	120	110	62	550	113		0.07	0.08	0.3	0.03	0.12	0.03	0.12	0.07	0.02	0.01	0.01	0.05	0.01		288.47	0.851347	0.851229	1.02098
	341-L1	2.91	14.78	50.55	0.3	9.92	0.16	7.22	7.59	1.43	0.05	1	0	0.17	96.08	229	162	206	228	253	322	364	135	118	112	62		116		0.07	0.08	0.3	0.03	0.12	0.03	0.12	0.07	0.02	0.01	0.01	0	0.01		303.65	0.740302	0.870634	1.0724
	341-L1	2.99	14.88	50.85	0.3	9.96	0.14	7.31	7.65	1.39	0.05	0.88	0.02	0.2	96.62	213	166	198	241	244	339	348	128	120	110	61	560	109		0.07	0.08	0.3	0.03	0.12	0.03	0.12	0.07	0.02	0.01	0.01	0.05	0.01		318.83	0.651466	0.886158	1.11805
	341-L1	2.95	14.74	50.77	0.32	9.89	0.13	7.4	7.63	1.44	0.04	0.78	0	0.18	96.27	213	168	196	210	268	350	350	132	123	111	62		121		0.07	0.08	0.3	0.03	0.12	0.03	0.12	0.07	0.02	0.01	0.01	0	0.02		334.01	0.577436	0.899094	1.15999
	341-L1	2.97	14.87	50.67	0.3	9.99	0.15	7.38	7.65	1.41	0.05	0.7	0	0.18	96.33	226	161	205	236	256	324	353	133	123	111	61		114		0.07	0.08	0.3	0.03	0.13	0.03	0.12	0.07	0.02	0.01	0.01	0	0.01		349.2	0.518211	0.909444	1.19676
	341-L1	2.96	14.8	50.83	0.33	9.95	0.15	7.33	7.64	1.43	0.04	0.64	0	0.21	96.3	222	165	203	226	262	339	349	133	122	111	61		109		0.07	0.08	0.3	0.03	0.12	0.03	0.12	0.07	0.02	0.01	0.01	0	0.02		364.38	0.473793	0.917206	1.22662
	341-L1	2.96	14.83	50.77	0.31	10.01	0.19	7.38	7.74	1.44	0.04	0.58	0	0.19	96.44	204	168	207	231	252	309	344	126	122	111	61		111		0.07	0.08	0.3	0.03	0.13	0.03	0.12	0.07	0.02	0.01	0.01	0	0.01		379.56	0.429375	0.924968	1.25884
	341-L1	3	14.78	50.88	0.33	9.95	0.17	7.42	7.71	1.45	0.04	0.54	0	0.18	96.45	229	165	204	215	255	320	353	132	118	112	61		112		0.07	0.08	0.3	0.03	0.12	0.03	0.12	0.07	0.02	0.01	0.01	0	0.01		394.74	0.399763	0.930142	1.28187
	341-L1	2.96	14.81	50.84	0.33	10	0.17	7.37	7.73	1.45	0.04	0.5	0	0.17	96.37	204	162	199	222	247	338	355	131	119	110	61		120		0.07	0.08	0.3	0.03	0.13	0.03	0.12	0.07	0.02	0.01	0.01	0	0.01		409.93	0.370151	0.935317	1.30634
	341-L1	2.95	14.85	50.58	0.34	10.04	0.16	7.34	7.61	1.43	0.04	0.47	0	0.19	96	212	160	200	217	240	325	345	133	122	111	61		119		0.07	0.08	0.3	0.03	0.13	0.03	0.12	0.07	0.02	0.01	0.01	0	0.02		425.11	0.347942	0.939198	1.32578
	341-L1	2.94	14.87	50.72	0.34	10.14	0.17	7.42	7.74	1.44	0.05	0.44	0.01	0.19	96.47	219	162	204	218	248	319	351	130	122	110	61	561	113		0.07	0.08	0.3	0.03	0.13	0.03	0.12	0.07	0.02	0.01	0.01	0.05	0.01		440.29	0.325733	0.943079	1.34627
	341-L1	3.01	14.94	50.83	0.3	10.1	0.16	7.39	7.8	1.44	0.05	0.41	0	0.17	96.6	207	165	203	237	243	330	355	134	123	111	61		117		0.07	0.08	0.3	0.03	0.13	0.03	0.12	0.07	0.02	0.01	0.01	-0.19	0.01		455.47	0.303524	0.94696	1.36796
	341-L1	2.93	14.88	50.87	0.32	10.11	0.16	7.44	7.73	1.45	0.04	0.4	0.01	0.2	96.53	204	165	198	230	262	324	344	133	119	112	61	551	109		0.07	0.08	0.3	0.03	0.13	0.03	0.12	0.07	0.02	0.01	0.01	0.05	0.01		470.65	0.296121	0.948254	1.37549
	341-L1	2.93	14.73	50.76	0.31	10.03	0.16	7.33	7.73	1.47	0.04	0.38	0	0.18	96.06	224	161	202	230	243	326	335	140	118	111	61		118		0.07	0.08	0.3	0.03	0.13	0.03	0.12	0.07	0.02	0.01	0.01	0	0.01		485.84	0.281315	0.950841	1.39103
	341-L1	2.99	14.73	50.7	0.31	10.03	0.16	7.46	7.71	1.46	0.05	0.37	0	0.18	96.17	209	163	203	219	259	333	347	129	123	111	61	554	113		0.07	0.08	0.3	0.03	0.13	0.03	0.12	0.07	0.02	0.01	0.01	0.05	0.01		501.02	0.273912	0.952135	1.39905		m=1/(4 Dt)^0,5 [microns^(-1)]=
	341-L1	2.96	14.67	50.7	0.31	10.12	0.16	7.44	7.76	1.47	0.05	0.36	0.02	0.18	96.21	208	167	197	220	261	340	357	135	118	110	60	553	112		0.07	0.08	0.3	0.03	0.13	0.03	0.12	0.07	0.02	0.01	0.01	0.05	0.01		516.2	0.266509	0.953428	1.40727
	341-L1	2.97	14.74	50.71	0.3	10.06	0.17	7.41	7.78	1.45	0.04	0.35	0	0.19	96.16	203	170	206	238	249	316	354	132	122	111	61		115		0.07	0.08	0.3	0.03	0.13	0.03	0.12	0.07	0.02	0.01	0.01	0	0.01		531.38	0.259106	0.954722	1.41567		D=1/(m^2*4*t) =[cm2/sec]=
	341-L1	2.92	14.76	50.58	0.32	10.03	0.17	7.37	7.7	1.47	0.04	0.34	0	0.19	95.89	231	170	202	218	255	323	367	131	121	110	61		115		0.07	0.08	0.3	0.03	0.13	0.03	0.12	0.07	0.02	0.01	0.01	0	0.02		546.57	0.251703	0.956016	1.42428
	341-L1	2.96	14.83	50.69	0.32	10.1	0.17	7.38	7.75	1.44	0.05	0.34	0.01	0.16	96.18	208	163	209	222	263	324	352	129	121	111	61	555	114		0.07	0.08	0.3	0.03	0.13	0.03	0.12	0.07	0.02	0.01	0.01	0.05	0.01		561.75	0.251703	0.956016	1.42428
	341-L1	2.92	14.84	50.82	0.31	10.08	0.17	7.45	7.75	1.46	0.04	0.34	0.01	0.19	96.39	218	168	203	229	262	320	343	132	123	111	61	558	111		0.07	0.08	0.3	0.03	0.13	0.03	0.12	0.07	0.02	0.01	0.01	0.05	0.01		576.93	0.251703	0.956016	1.42428
	341-L1	2.94	14.84	50.79	0.31	10.07	0.17	7.41	7.77	1.44	0.05	0.33	0	0.18	96.31	227	161	203	238	250	310	340	139	123	110	61		110		0.07	0.08	0.3	0.03	0.13	0.03	0.12	0.07	0.02	0.01	0.01	0	0.01		592.12	0.2443	0.957309	1.43311
	341-L1	2.95	14.79	50.76	0.32	10.08	0.18	7.43	7.8	1.46	0.04	0.34	0	0.18	96.31	218	165	206	217	251	326	358	127	120	112	60		112		0.07	0.08	0.3	0.03	0.13	0.03	0.12	0.07	0.02	0.01	0.01	0	0.01		607.3	0.251703	0.956016	1.42428
	341-L1	2.93	14.74	50.76	0.3	10.16	0.17	7.48	7.82	1.46	0.05	0.33	0	0.2	96.4	199	160	206	240	244	317	338	133	121	109	61		110		0.07	0.08	0.3	0.03	0.13	0.03	0.12	0.07	0.02	0.01	0.01	0	0.01		622.48	0.2443	0.957309	1.43311
	341-L1	3.03	14.73	50.67	0.3	10.23	0.18	7.4	7.87	1.47	0.05	0.33	0	0.18	96.43	213	172	198	228	254	323	361	127	120	111	61		103		0.07	0.08	0.3	0.03	0.13	0.03	0.12	0.07	0.02	0.01	0.01	0	0.01		637.66	0.2443	0.957309	1.43311
	341-L1	2.91	14.7	50.67	0.33	10.17	0.16	7.45	7.8	1.45	0.05	0.32	0	0.18	96.19	235	166	199	210	255	337	341	128	122	112	61		109		0.07	0.08	0.3	0.03	0.13	0.03	0.12	0.07	0.02	0.01	0.01	0	0.01		652.84	0.236897	0.958603	1.44217
	341-L1	2.92	14.77	50.72	0.31	10.13	0.16	7.48	7.78	1.46	0.03	0.33	0	0.17	96.26	219	162	203	228	252	325	341	131	123	112	61	551	122		0.07	0.08	0.3	0.03	0.13	0.03	0.12	0.07	0.02	0.01	0.01	0.05	0.01		668.03	0.2443	0.957309	1.43311
	341-L1	2.91	14.8	50.7	0.31	10.15	0.17	7.48	7.79	1.44	0.05	0.33	0	0.18	96.32	228	163	203	221	246	332	360	131	122	112	60	560	115		0.07	0.08	0.3	0.03	0.13	0.03	0.12	0.07	0.02	0.01	0.01	0.05	0.01		683.21	0.2443	0.957309	1.43311
	341-L1	2.98	14.84	50.63	0.31	10.15	0.16	7.39	7.85	1.45	0.04	0.33	0	0.19	96.31	217	168	203	223	272	323	346	134	122	112	60		111		0.07	0.08	0.3	0.03	0.13	0.03	0.12	0.07	0.02	0.01	0.01	0	0.01		698.39	0.2443	0.957309	1.43311
	341-L1	2.98	14.7	50.62	0.31	10.17	0.16	7.45	7.84	1.46	0.04	0.32	0	0.17	96.23	211	164	209	222	245	322	357	136	121	111	61		112		0.07	0.08	0.3	0.03	0.13	0.03	0.12	0.07	0.02	0.01	0.01	0	0.01		713.57	0.236897	0.958603	1.44217
	341-L1	2.93	14.68	50.88	0.33	10.32	0.15	7.38	7.85	1.48	0.04	0.32	0.01	0.16	96.52	227	164	199	226	244	333	350	129	119	112	60	552	123		0.07	0.08	0.3	0.03	0.13	0.03	0.12	0.07	0.02	0.01	0.01	0.05	0.01		728.76	0.236897	0.958603	1.44217
	341-L1	2.93	14.74	50.75	0.32	10.07	0.15	7.41	7.82	1.45	0.05	0.32	0	0.2	96.22	212	164	206	227	257	340	343	135	122	111	61		107		0.07	0.08	0.3	0.03	0.13	0.03	0.12	0.07	0.02	0.01	0.01	0	0.01		743.94	0.236897	0.958603	1.44217
	341-L1	2.99	14.79	50.65	0.31	10.25	0.17	7.48	7.86	1.45	0.04	0.31	0	0.19	96.49	218	162	207	227	255	320	364	133	121	111	61		110		0.07	0.08	0.3	0.03	0.13	0.03	0.12	0.07	0.02	0.01	0.01	0	0.01		759.12	0.229494	0.959897	1.45146
	341-L1	2.91	14.73	50.69	0.33	10.16	0.15	7.52	7.9	1.47	0.05	0.32	0.01	0.2	96.42	217	164	208	221	257	327	343	138	119	111	61	555	114		0.07	0.08	0.3	0.03	0.13	0.03	0.12	0.07	0.02	0.01	0.01	0.05	0.02		774.3	0.236897	0.958603	1.44217
	341-L1	2.94	14.72	50.77	0.32	10.18	0.17	7.49	7.86	1.44	0.05	0.32	0	0.2	96.46	227	169	202	226	259	333	344	131	120	111	61	557	116		0.07	0.08	0.3	0.03	0.13	0.03	0.12	0.07	0.02	0.01	0.01	0.05	0.02		789.49	0.236897	0.958603	1.44217
	341-L1	2.92	14.71	50.66	0.31	10.16	0.2	7.47	7.84	1.46	0.04	0.32	0	0.19	96.29	237	168	201	236	261	311	354	135	119	112	61		113		0.07	0.08	0.3	0.03	0.13	0.03	0.12	0.07	0.02	0.01	0.01	0	0.01		804.67	0.236897	0.958603	1.44217
	341-L1	2.91	14.78	50.69	0.32	10.14	0.15	7.49	7.84	1.47	0.04	0.31	0	0.19	96.34	220	167	206	225	254	342	337	142	118	112	61		119		0.07	0.08	0.3	0.03	0.13	0.03	0.12	0.07	0.02	0.01	0.01	0	0.02		819.85	0.229494	0.959897	1.45146
	341-L1	2.97	14.71	50.73	0.3	10.14	0.19	7.44	7.93	1.48	0.04	0.32	0.01	0.19	96.44	219	161	208	236	252	299	348	130	119	112	61	547	112		0.07	0.08	0.3	0.03	0.13	0.03	0.12	0.07	0.02	0.01	0.01	0.05	0.01		835.04	0.236897	0.958603	1.44217
	341-L1	2.94	14.68	50.75	0.31	10.21	0.13	7.38	7.87	1.45	0.04	0.31	0	0.2	96.29	226	168	206	221	265	349	353	136	121	111	61		109		0.07	0.08	0.3	0.03	0.13	0.03	0.12	0.07	0.02	0.01	0.01	0	0.02		850.22	0.229494	0.959897	1.45146
	341-L1	2.97	14.88	50.88	0.32	10.18	0.16	7.37	7.79	1.47	0.04	0.31	0	0.2	96.57	223	159	202	222	241	323	356	129	119	111	61		104		0.07	0.08	0.3	0.03	0.13	0.03	0.12	0.07	0.02	0.01	0.01	0	0.01		865.4	0.229494	0.959897	1.45146
	341-L1	2.96	14.81	50.84	0.32	10.2	0.17	7.45	7.87	1.46	0.04	0.31	0	0.19	96.62	217	163	200	214	248	313	360	135	119	112	61		109		0.07	0.08	0.3	0.03	0.13	0.03	0.12	0.07	0.02	0.01	0.01	0	0.01		880.58	0.229494	0.959897	1.45146
	341-L1	2.93	14.82	50.84	0.31	10.11	0.16	7.43	7.85	1.45	0.04	0.3	0	0.19	96.43	223	169	204	227	257	318	353	132	121	111	61		123		0.07	0.08	0.3	0.03	0.13	0.03	0.12	0.07	0.02	0.01	0.01	0	0.02		895.77	0.222091	0.96119	1.46102
	341-L1	2.95	14.74	50.79	0.33	10.26	0.17	7.49	7.9	1.46	0.04	0.31	0	0.17	96.6	213	160	204	208	247	329	345	130	122	110	61		119		0.07	0.08	0.3	0.03	0.13	0.03	0.12	0.07	0.02	0.01	0.01	0	0.01		910.95	0.229494	0.959897	1.45146
	341-L1	2.93	14.78	50.94	0.31	10.16	0.16	7.39	7.8	1.46	0.04	0.31	0	0.19	96.47	215	166	206	228	260	336	346	131	120	111	61		112		0.07	0.08	0.3	0.03	0.13	0.03	0.12	0.07	0.02	0.01	0.01	0	0.01		926.13	0.229494	0.959897	1.45146
	341-L1	2.94	14.73	50.78	0.3	10.2	0.16	7.46	7.73	1.45	0.05	0.31	0.01	0.19	96.29	211	165	205	231	251	345	352	143	122	112	61	551	111		0.07	0.08	0.3	0.03	0.13	0.03	0.12	0.07	0.02	0.01	0.01	0.05	0.01		941.31	0.229494	0.959897	1.45146
	341-L1	2.97	14.78	50.55	0.3	10.24	0.16	7.48	7.82	1.45	0.04	0.31	0	0.18	96.28	225	166	196	237	257	334	348	136	123	112	61		108		0.07	0.08	0.3	0.03	0.13	0.03	0.12	0.07	0.02	0.01	0.01	0	0.01		956.49	0.229494	0.959897	1.45146
	341-L1	2.96	14.68	50.68	0.32	10.18	0.15	7.49	7.81	1.45	0.05	0.3	0	0.19	96.25	218	165	204	227	246	329	343	131	122	111	61		105		0.07	0.08	0.3	0.03	0.13	0.03	0.12	0.07	0.02	0.01	0.01	0	0.01		971.68	0.222091	0.96119	1.46102
	341-L1	2.97	14.75	50.72	0.3	10.2	0.16	7.39	7.8	1.47	0.04	0.3	0	0.2	96.29	212	163	208	240	255	336	355	141	120	112	61		116		0.07	0.08	0.3	0.03	0.13	0.03	0.12	0.07	0.02	0.01	0.01	0	0.02		986.86	0.222091	0.96119	1.46102
	341-L1	2.9	14.77	50.9	0.3	10.22	0.15	7.42	7.85	1.45	0.05	0.3	0.01	0.17	96.5	222	166	201	212	255	325	339	129	120	110	61	563	114		0.07	0.08	0.3	0.03	0.13	0.03	0.12	0.07	0.02	0.01	0.01	0.05	0.01		1002.04	0.222091	0.96119	1.46102
	341-L1	2.96	14.66	50.84	0.31	10.22	0.14	7.37	7.85	1.46	0.04	0.3	0	0.2	96.34	218	164	200	232	248	347	358	136	121	112	61		113		0.07	0.08	0.3	0.03	0.13	0.03	0.12	0.07	0.02	0.01	0.01	0	0.02		1017.22	0.222091	0.96119	1.46102
	341-L1	2.92	14.86	50.66	0.3	10.24	0.17	7.43	7.87	1.45	0.05	0.29	0.03	0.19	96.46	225	161	200	230	250	313	360	137	121	112	61	547	113		0.07	0.08	0.3	0.03	0.13	0.03	0.12	0.07	0.02	0.01	0.01	0.05	0.01		1032.41	0.214688	0.962484	1.47085
	341-L1	2.99	14.8	50.79	0.32	10.23	0.2	7.4	7.85	1.47	0.04	0.3	0	0.17	96.55	210	167	202	236	249	311	331	137	119	112	61		118		0.07	0.08	0.3	0.03	0.13	0.03	0.12	0.07	0.02	0.01	0.01	0	0.01		1047.59	0.222091	0.96119	1.46102
	341-L1	2.95	14.79	50.76	0.33	10.17	0.17	7.46	7.84	1.45	0.05	0.3	0	0.2	96.47	222	162	203	222	244	329	352	134	119	110	61		103		0.07	0.08	0.3	0.03	0.13	0.03	0.12	0.07	0.02	0.01	0.01	0	0.01		1062.77	0.222091	0.96119	1.46102
	341-L1	2.94	14.75	50.65	0.32	10.22	0.18	7.38	7.88	1.47	0.05	0.29	0	0.18	96.29	229	168	208	230	251	327	352	129	119	111	60		114		0.07	0.08	0.3	0.03	0.13	0.03	0.12	0.07	0.02	0.01	0.01	0	0.01		1077.95	0.214688	0.962484	1.47085
	341-L1	2.96	14.76	50.74	0.3	10.24	0.16	7.33	7.81	1.46	0.05	0.29	0	0.19	96.3	212	170	203	226	245	317	358	135	121	110	61		112		0.07	0.08	0.3	0.03	0.13	0.03	0.12	0.07	0.02	0.01	0.01	0	0.01		1093.14	0.214688	0.962484	1.47085
	341-L1	2.92	14.81	50.63	0.31	10.23	0.16	7.32	7.82	1.47	0.04	0.3	0	0.18	96.18	205	159	204	222	250	321	351	135	121	111	61		105		0.07	0.08	0.3	0.03	0.13	0.03	0.12	0.07	0.02	0.01	0.01	0	0.01		1108.32	0.222091	0.96119	1.46102
	341-L1	2.98	14.72	50.95	0.32	10.21	0.18	7.29	7.88	1.45	0.05	0.3	0.01	0.18	96.52	221	162	203	235	258	334	351	131	122	111	60	558	111		0.07	0.08	0.3	0.03	0.13	0.03	0.12	0.07	0.02	0.01	0.01	0.05	0.01		1123.5	0.222091	0.96119	1.46102
	341-L1	2.96	14.8	50.78	0.32	10.18	0.17	7.42	7.82	1.46	0.04	0.29	0	0.18	96.45	224	159	205	229	240	326	356	131	119	112	61		110		0.07	0.08	0.3	0.03	0.13	0.03	0.12	0.07	0.02	0.01	0.01	0	0.01		1138.68	0.214688	0.962484	1.47085
	341-L1	2.95	14.79	50.69	0.33	10.2	0.17	7.29	7.82	1.45	0.05	0.29	0	0.19	96.21	215	164	197	218	248	328	353	128	120	111	61		118		0.07	0.08	0.3	0.03	0.13	0.03	0.12	0.07	0.02	0.01	0.01	0	0.02		1153.87	0.214688	0.962484	1.47085
	341-L1	2.99	14.75	50.77	0.31	10.14	0.19	7.33	7.81	1.47	0.04	0.29	0	0.19	96.27	226	163	202	219	264	301	365	139	119	112	60		110		0.07	0.08	0.3	0.03	0.13	0.03	0.12	0.07	0.02	0.01	0.01	0	0.01		1169.05	0.214688	0.962484	1.47085
	341-L1	2.95	14.82	50.69	0.3	10.21	0.17	7.4	7.82	1.47	0.04	0.29	0	0.17	96.33	222	166	204	225	253	326	353	139	117	111	60		107		0.07	0.08	0.3	0.03	0.13	0.03	0.12	0.07	0.02	0.01	0.01	0	0.01		1184.23	0.214688	0.962484	1.47085
	341-L1	3.01	14.73	50.8	0.31	10.25	0.16	7.44	7.86	1.46	0.05	0.29	0	0.18	96.55	194	162	207	238	247	336	357	130	119	110	60		116		0.07	0.08	0.3	0.03	0.13	0.03	0.12	0.07	0.02	0.01	0.01	0	0.01		1199.41	0.214688	0.962484	1.47085
	341-L1	2.92	14.8	50.71	0.33	10.27	0.13	7.35	7.85	1.46	0.04	0.29	0	0.19	96.34	220	164	207	229	251	345	350	132	121	112	61	554	114		0.07	0.08	0.3	0.03	0.13	0.03	0.12	0.07	0.02	0.01	0.01	0.05	0.01		1214.6	0.214688	0.962484	1.47085
	341-L1	3.01	14.83	50.76	0.29	10.21	0.14	7.37	7.92	1.45	0.05	0.29	0	0.17	96.5	230	167	206	234	247	344	361	133	121	110	61		116		0.07	0.08	0.3	0.03	0.13	0.03	0.12	0.07	0.02	0.01	0.01	0	0.01		1229.78	0.214688	0.962484	1.47085
	341-L1	2.97	14.71	50.7	0.31	10.15	0.16	7.34	7.88	1.46	0.04	0.29	0	0.19	96.22	220	167	201	230	247	326	343	137	118	112	61		112		0.07	0.08	0.3	0.03	0.13	0.03	0.12	0.07	0.02	0.01	0.01	0	0.01		1244.96	0.214688	0.962484	1.47085
	341-L1	2.99	14.83	50.79	0.31	10.25	0.16	7.35	7.87	1.45	0.04	0.29	0	0.19	96.52	235	164	202	234	251	325	354	136	121	113	61		111		0.07	0.08	0.3	0.03	0.13	0.03	0.12	0.07	0.02	0.01	0.01	0	0.01		1260.14	0.214688	0.962484	1.47085
	341-L1	2.97	14.75	50.69	0.33	10.19	0.18	7.41	7.88	1.45	0.04	0.29	0	0.19	96.38	202	166	207	226	245	324	331	131	122	112	61	556	108		0.07	0.08	0.3	0.03	0.13	0.03	0.12	0.07	0.02	0.01	0.01	0.05	0.01		1275.33	0.214688	0.962484	1.47085
	341-L1	2.94	14.71	50.82	0.31	10.23	0.18	7.39	7.93	1.45	0.04	0.29	0	0.18	96.47	218	166	204	229	245	331	339	135	121	111	60		111		0.07	0.08	0.3	0.03	0.13	0.03	0.12	0.07	0.02	0.01	0.01	0	0.01		1290.51	0.214688	0.962484	1.47085
	341-L1	2.99	14.75	50.68	0.32	10.16	0.18	7.42	7.87	1.46	0.05	0.29	0	0.2	96.37	216	165	202	228	248	311	337	134	122	111	61		109		0.07	0.08	0.3	0.03	0.13	0.03	0.12	0.07	0.02	0.01	0.01	0	0.01		1305.69	0.214688	0.962484	1.47085
	341-L1	2.97	14.66	50.77	0.3	10.16	0.16	7.34	7.91	1.46	0.04	0.29	0	0.2	96.26	204	167	202	237	246	340	328	129	124	112	61		105		0.07	0.08	0.3	0.03	0.13	0.03	0.12	0.07	0.02	0.01	0.01	0	0.01		1320.87	0.214688	0.962484	1.47085
	341-L1	2.95	14.7	50.71	0.33	10.23	0.17	7.19	7.82	1.46	0.03	0.29	0.01	0.2	96.1	214	162	205	221	242	328	354	135	122	113	61	551	108		0.07	0.08	0.3	0.03	0.13	0.03	0.12	0.07	0.02	0.01	0.01	0.05	0.01		1336.05	0.214688	0.962484	1.47085
	341-L1	2.97	14.8	50.83	0.32	10.27	0.17	7.33	7.87	1.44	0.04	0.29	0.01	0.2	96.53	223	167	200	226	239	325	348	139	121	111	61	555	108		0.07	0.08	0.3	0.03	0.13	0.03	0.12	0.07	0.02	0.01	0.01	0.05	0.01		1351.24	0.214688	0.962484	1.47085
	341-L1	3.02	14.71	50.74	0.31	10.27	0.17	7.29	7.85	1.45	0.05	0.29	0	0.17	96.32	208	163	204	239	241	329	350	139	121	111	61		114		0.07	0.08	0.3	0.03	0.13	0.03	0.12	0.07	0.02	0.01	0.01	0	0.01		1366.42	0.214688	0.962484	1.47085
	341-L1	2.94	14.76	50.84	0.3	10.18	0.18	7.27	7.91	1.45	0.05	0.29	0	0.2	96.37	223	164	201	233	257	323	359	124	122	111	61		111		0.07	0.08	0.3	0.03	0.13	0.03	0.12	0.07	0.02	0.01	0.01	0	0.02		1381.61	0.214688	0.962484	1.47085
	341-L1	2.97	14.79	50.66	0.32	10.27	0.17	7.32	7.83	1.46	0.04	0.3	0	0.2	96.31	217	165	197	236	251	325	321	135	122	111	60		109		0.07	0.08	0.3	0.03	0.13	0.03	0.12	0.07	0.02	0.01	0.01	0	0.01		1396.79	0.222091	0.96119	1.46102
	341-L1	2.96	14.75	50.86	0.33	10.17	0.2	7.32	7.82	1.45	0.04	0.3	0	0.18	96.38	198	169	204	216	256	303	344	130	121	111	60		115		0.07	0.08	0.3	0.03	0.13	0.03	0.12	0.07	0.02	0.01	0.01	0	0.01		1411.97	0.222091	0.96119	1.46102
	341-L1	2.96	14.73	50.85	0.32	10.29	0.18	7.39	7.92	1.45	0.05	0.3	0	0.19	96.64	221	165	200	221	258	340	347	132	121	111	61		108		0.07	0.08	0.3	0.03	0.13	0.03	0.12	0.07	0.02	0.01	0.01	0	0.01		1427.15	0.222091	0.96119	1.46102
	341-L1	2.97	14.71	50.82	0.33	10.26	0.17	7.27	7.81	1.47	0.05	0.3	0	0.18	96.34	217	163	206	218	256	328	358	137	119	112	60		105		0.07	0.08	0.3	0.03	0.13	0.03	0.12	0.07	0.02	0.01	0.01	0	0.01		1442.33	0.222091	0.96119	1.46102
	341-L1	2.96	14.68	50.69	0.32	10.28	0.15	7.21	7.92	1.46	0.04	0.3	0	0.2	96.21	224	166	205	231	249	340	351	135	120	112	60		111		0.07	0.08	0.3	0.03	0.13	0.03	0.12	0.07	0.02	0.01	0.01	0	0.02		1457.52	0.222091	0.96119	1.46102
	341-L1	2.92	14.74	50.71	0.32	10.16	0.17	7.27	7.86	1.46	0.04	0.31	0	0.18	96.14	217	165	199	218	246	317	335	135	123	112	61		113		0.07	0.08	0.3	0.03	0.13	0.03	0.12	0.07	0.02	0.01	0.01	0	0.01		1472.7	0.229494	0.959897	1.45146
	341-L1	2.98	14.79	50.88	0.31	10.22	0.15	7.26	7.85	1.47	0.04	0.31	0	0.21	96.46	209	168	205	216	245	332	335	130	122	112	60		104		0.07	0.08	0.3	0.03	0.13	0.03	0.12	0.07	0.02	0.01	0.01	0	0.01		1487.88	0.229494	0.959897	1.45146
	341-L1	2.95	14.75	50.73	0.33	10.25	0.14	7.34	7.91	1.44	0.05	0.31	0	0.18	96.37	219	164	202	219	238	342	341	134	123	111	61		110		0.07	0.08	0.3	0.03	0.13	0.03	0.12	0.07	0.02	0.01	0.01	0	0.01		1503.06	0.229494	0.959897	1.45146
	341-L1	2.97	14.82	50.8	0.3	10.22	0.15	7.23	7.82	1.44	0.04	0.31	0	0.19	96.3	224	163	204	238	256	350	352	131	123	111	60		113		0.07	0.08	0.3	0.03	0.13	0.03	0.12	0.07	0.02	0.01	0.01	0	0.01		1518.25	0.229494	0.959897	1.45146
	341-L1	3.02	14.71	50.64	0.33	10.21	0.17	7.26	7.85	1.46	0.04	0.31	0	0.2	96.19	220	164	208	211	252	326	348	136	119	111	60		103		0.07	0.08	0.3	0.03	0.13	0.03	0.12	0.07	0.02	0.01	0.01	0	0.01		1533.43	0.229494	0.959897	1.45146
	341-L1	3.03	14.64	50.71	0.31	10.21	0.18	7.2	7.87	1.46	0.04	0.31	0	0.19	96.15	199	162	198	226	259	327	362	131	120	112	61		120		0.07	0.08	0.3	0.03	0.13	0.03	0.12	0.07	0.02	0.01	0.01	0	0.02		1548.61	0.229494	0.959897	1.45146
	341-L1	2.99	14.75	50.65	0.33	10.2	0.16	7.26	7.88	1.46	0.04	0.32	0	0.19	96.24	213	161	205	218	242	315	351	128	121	112	60		111		0.07	0.08	0.3	0.03	0.13	0.03	0.12	0.07	0.02	0.01	0.01	0	0.01		1563.79	0.236897	0.958603	1.44217
	341-L1	2.98	14.56	50.55	0.34	10.24	0.17	7.2	7.9	1.47	0.04	0.32	0	0.19	95.98	229	170	207	218	263	321	349	134	121	112	60		108		0.07	0.08	0.3	0.03	0.13	0.03	0.12	0.07	0.02	0.01	0.01	0	0.01		1578.98	0.236897	0.958603	1.44217
	341-L1	2.95	14.7	50.81	0.32	10.24	0.17	7.14	7.85	1.46	0.04	0.32	0	0.2	96.2	236	166	205	227	255	326	342	131	120	112	61		109		0.07	0.08	0.3	0.03	0.13	0.03	0.12	0.07	0.02	0.01	0.01	0	0.02		1594.16	0.236897	0.958603	1.44217
	341-L1	2.98	14.77	50.63	0.32	10.18	0.18	7.09	7.9	1.45	0.05	0.32	0	0.19	96.05	227	164	202	247	250	314	351	133	120	112	61		121		0.07	0.08	0.3	0.03	0.13	0.03	0.12	0.07	0.02	0.01	0.01	0	0.02		1609.34	0.236897	0.958603	1.44217
	341-L1	2.95	14.64	50.7	0.3	10.2	0.16	7.23	7.89	1.45	0.05	0.33	0.02	0.19	96.1	228	157	207	232	270	319	348	132	120	110	60	550	108		0.07	0.08	0.3	0.03	0.13	0.03	0.12	0.07	0.02	0.01	0.01	0.05	0.01		1624.52	0.2443	0.957309	1.43311
	341-L1	3.01	14.63	50.68	0.3	10.22	0.18	7.24	7.91	1.45	0.04	0.33	0	0.18	96.16	217	164	200	236	263	326	337	133	118	112	61		110		0.07	0.08	0.3	0.03	0.13	0.03	0.12	0.07	0.02	0.01	0.01	0	0.01		1639.71	0.2443	0.957309	1.43311

## Sheet: Dataset S8
	EPMA analyses	Sample PC343
		Oxide														Det.Lim ppm(A)																	StdDev wt%
	Comment	Na2O	Al2O3	SiO2	K2O	CaO	MnO	FeO	MgO	TiO2	Cr2O3	ZrO2	HfO2	P2O5	Total	Na	Al	Si	K	Ca	Mn	Fe	Mg	Ti	Cr	Zr	Hf	P	O	Na	Al	Si	K	Ca	Mn	Fe	Mg	Ti	Cr	Zr	Hf	P	O	Distance (µm)	ZrO2, wt%	Zr, wt%	1-Cx/Co	erf-1 (1-Cx/Co)
	343-L2	2.96	14.74	50.52	0.3	10.15	0.14	7.77	7.93	1.46	0.05	0.21	0	0.19	96.42	214	165	204	232	253	358	339	130	122	111	61	561	113		0.07	0.08	0.3	0.03	0.13	0.03	0.12	0.07	0.02	0.01	0.01	0.05	0.01		0	64.13	47.4756
	343-L2	2.95	14.67	50.6	0.32	10.18	0.15	7.78	7.91	1.45	0.04	0.2	0	0.19	96.45	211	161	203	224	266	335	351	126	121	112	61		113		0.07	0.08	0.3	0.03	0.13	0.03	0.12	0.07	0.02	0.01	0.01	0	0.01		10.02	25.29	18.7222
	343-L2	3	14.76	50.75	0.31	10.21	0.16	7.85	7.85	1.47	0.04	0.2	0	0.18	96.78	219	164	202	227	260	320	347	140	120	112	61		113		0.07	0.08	0.3	0.03	0.13	0.03	0.12	0.07	0.02	0.01	0.01	0	0.01		20.04	5.33	3.94581	0	0
	343-L2	2.97	14.65	50.66	0.31	10.22	0.14	7.83	7.9	1.46	0.05	0.2	0	0.18	96.56	209	167	209	226	273	357	361	128	121	112	61		108		0.07	0.08	0.3	0.03	0.13	0.03	0.12	0.07	0.02	0.01	0.01	0	0.01		30.05	5.21	3.85697	0.0225141	0.0199552
	343-L2	2.98	14.74	50.74	0.3	10.13	0.17	7.78	7.9	1.44	0.05	0.21	0	0.18	96.62	225	166	200	239	270	321	343	142	123	112	61		113		0.07	0.08	0.3	0.03	0.13	0.03	0.12	0.07	0.02	0.01	0.01	0	0.01		40.07	4.92	3.64229	0.0769231	0.0682773
	343-L2	2.94	14.75	50.74	0.3	10.15	0.16	7.75	7.86	1.49	0.04	0.21	0	0.18	96.57	207	162	202	240	265	321	352	134	121	112	61		119		0.07	0.08	0.3	0.03	0.13	0.03	0.12	0.07	0.02	0.01	0.01	0	0.02		50.09	4.66	3.44981	0.125704	0.111867
	343-L2	2.92	14.71	50.57	0.3	10.24	0.16	7.74	7.93	1.45	0.04	0.21	0	0.19	96.48	219	162	203	228	254	332	355	135	122	113	61		116		0.07	0.08	0.3	0.03	0.13	0.03	0.12	0.07	0.02	0.01	0.01	0	0.02		60.11	4.38	3.24252	0.178236	0.159295
	343-L2	2.96	14.66	50.61	0.31	10.21	0.2	7.77	7.87	1.47	0.05	0.21	0	0.16	96.47	219	163	207	232	250	308	355	135	119	111	61		120		0.07	0.08	0.3	0.03	0.13	0.03	0.12	0.07	0.02	0.01	0.01	0	0.01		70.13	4.14	3.06485	0.223265	0.200518
	343-L2	2.94	14.77	50.58	0.33	10.14	0.15	7.78	7.9	1.45	0.04	0.21	0.01	0.2	96.51	216	161	203	223	249	327	353	138	122	112	61	563	108		0.07	0.08	0.3	0.03	0.13	0.03	0.12	0.07	0.02	0.01	0.01	0.05	0.01		80.14	3.88	2.87237	0.272045	0.245965
	343-L2	2.88	14.66	50.68	0.31	10.16	0.16	7.82	7.82	1.47	0.05	0.21	0.01	0.18	96.41	231	167	205	230	266	334	350	133	120	111	61	560	117		0.07	0.08	0.3	0.03	0.13	0.03	0.12	0.07	0.02	0.01	0.01	0.05	0.01		90.16	3.63	2.6873	0.318949	0.290642
	343-L2	2.92	14.68	50.68	0.33	10.14	0.16	7.8	7.88	1.44	0.04	0.21	0	0.2	96.49	223	171	204	232	256	335	356	130	118	112	61		114		0.07	0.08	0.3	0.03	0.13	0.03	0.12	0.07	0.02	0.01	0.01	0	0.02		100.18	3.4	2.51703	0.362101	0.332792
	343-L2	2.94	14.72	50.66	0.31	10.27	0.15	7.74	7.93	1.45	0.04	0.22	0	0.2	96.6	205	168	204	232	251	343	345	130	124	113	61	558	107		0.07	0.08	0.3	0.03	0.13	0.03	0.12	0.07	0.02	0.01	0.01	0.05	0.01		110.2	3.17	2.34676	0.405253	0.37616
	343-L2	2.95	14.64	50.48	0.32	10.2	0.15	7.8	7.89	1.43	0.05	0.22	0.02	0.2	96.34	215	170	207	225	266	342	350	137	124	111	61	557	116		0.07	0.08	0.3	0.03	0.13	0.03	0.12	0.07	0.02	0.01	0.01	0.05	0.02		120.22	2.93	2.16908	0.450281	0.422978
	343-L2	2.95	14.64	50.6	0.32	10.13	0.16	7.8	7.89	1.46	0.04	0.22	0	0.17	96.39	216	164	201	231	257	330	341	134	121	112	61	563	117		0.07	0.08	0.3	0.03	0.13	0.03	0.12	0.07	0.02	0.01	0.01	0.05	0.01		150.27	2.38	1.76192	0.553471	0.53826
	343-L2	3	14.67	50.82	0.31	10.23	0.16	7.77	7.9	1.44	0.05	0.22	0	0.21	96.77	223	163	203	230	264	321	349	139	122	112	61		110		0.07	0.08	0.3	0.03	0.13	0.03	0.12	0.07	0.02	0.01	0.01	0	0.02		160.29	2.19	1.62126	0.589118	0.581484
	343-L2	3.01	14.76	50.97	0.31	10.19	0.18	7.82	7.92	1.43	0.04	0.22	0	0.19	97.05	203	164	204	242	258	305	352	122	124	113	61		113		0.07	0.08	0.31	0.03	0.13	0.03	0.12	0.07	0.02	0.01	0.01	0	0.01		170.31	2.03	1.50281	0.619137	0.619643
	343-L2	2.95	14.73	50.65	0.31	10.14	0.14	7.84	7.94	1.45	0.04	0.23	0	0.2	96.61	224	160	207	224	257	338	350	135	122	113	61		109		0.07	0.08	0.3	0.03	0.13	0.03	0.12	0.07	0.02	0.01	0.01	0	0.01		190.34	1.78	1.31774	0.666041	0.683186
	343-L2	2.97	14.75	50.58	0.32	10.15	0.15	7.78	7.91	1.46	0.04	0.23	0	0.19	96.54	219	170	203	219	251	324	359	134	122	112	61		105		0.07	0.08	0.3	0.03	0.13	0.03	0.12	0.07	0.02	0.01	0.01	0	0.01		200.36	1.63	1.20669	0.694184	0.724106
	343-L2	2.9	14.66	50.6	0.31	10.18	0.16	7.76	7.92	1.45	0.04	0.23	0	0.19	96.42	233	170	196	241	249	321	365	136	122	112	61		115		0.07	0.08	0.3	0.03	0.13	0.03	0.12	0.07	0.02	0.01	0.01	0	0.02		210.38	1.5	1.11045	0.718574	0.76164
	343-L2	2.93	14.63	50.58	0.31	10.22	0.14	7.79	7.96	1.44	0.05	0.22	0	0.18	96.46	209	164	207	224	251	348	341	136	122	112	61		108		0.07	0.08	0.3	0.03	0.13	0.03	0.12	0.07	0.02	0.01	0.01	0	0.01		220.4	1.37	1.01421	0.742964	0.801453
	343-L2	2.94	14.65	50.62	0.32	10.2	0.16	7.77	7.91	1.44	0.04	0.23	0.01	0.19	96.49	219	164	202	231	251	331	355	133	121	113	61	557	108		0.07	0.08	0.3	0.03	0.13	0.03	0.12	0.07	0.02	0.01	0.01	0.05	0.01		230.42	1.28	0.947587	0.75985	0.830576
	343-L2	2.98	14.67	50.58	0.33	10.24	0.15	7.82	7.92	1.47	0.05	0.23	0	0.19	96.63	219	167	203	230	263	345	348	138	119	110	61		120		0.07	0.08	0.3	0.03	0.13	0.03	0.12	0.07	0.02	0.01	0.01	0	0.02		240.43	1.16	0.85875	0.782364	0.871748
	343-L2	2.93	14.64	50.52	0.33	10.12	0.16	7.86	7.92	1.46	0.05	0.23	0	0.18	96.39	220	173	206	213	264	326	349	141	123	113	61	555	109		0.07	0.08	0.3	0.03	0.13	0.03	0.12	0.07	0.02	0.01	0.01	0.05	0.01		250.45	1.06	0.78472	0.801126	0.908466
	343-L2	2.94	14.6	50.55	0.33	10.21	0.16	7.76	7.96	1.44	0.05	0.23	0	0.17	96.38	209	161	210	225	255	332	360	134	124	111	61		118		0.07	0.08	0.3	0.03	0.13	0.03	0.12	0.07	0.02	0.01	0.01	0	0.01		260.47	0.98	0.725496	0.816135	0.939709
	343-L2	3	14.63	50.49	0.32	10.2	0.15	7.75	7.94	1.45	0.04	0.23	0	0.18	96.38	219	166	208	232	259	338	347	135	122	112	61		103		0.07	0.08	0.3	0.03	0.13	0.03	0.12	0.07	0.02	0.01	0.01	0	0.01		270.49	0.9	0.666272	0.831144	0.972902
	343-L2	2.93	14.66	50.6	0.31	10.11	0.14	7.84	7.9	1.46	0.04	0.23	0	0.19	96.43	207	169	202	221	254	346	357	141	124	111	61		108		0.07	0.08	0.3	0.03	0.13	0.03	0.12	0.07	0.02	0.01	0.01	0	0.01		280.51	0.82	0.607048	0.846154	1.00839
	343-L2	2.91	14.57	50.54	0.32	10.16	0.17	7.79	7.91	1.46	0.04	0.24	0	0.17	96.29	232	167	207	230	259	328	364	140	122	113	61		114		0.07	0.08	0.3	0.03	0.13	0.03	0.12	0.07	0.02	0.01	0.01	0	0.01		290.52	0.76	0.56263	0.857411	1.03677
	343-L2	2.99	14.69	50.62	0.3	10.21	0.15	7.8	7.9	1.47	0.05	0.24	0	0.18	96.58	220	162	206	242	263	340	338	135	121	111	61		114		0.07	0.08	0.3	0.03	0.13	0.03	0.12	0.07	0.02	0.01	0.01	0	0.01		300.54	0.7	0.518211	0.868668	1.06693
	343-L2	3	14.45	50.24	0.33	10.17	0.15	7.81	7.91	1.45	0.04	0.24	0	0.19	95.97	220	169	201	223	262	325	361	137	120	111	61		111		0.07	0.08	0.3	0.03	0.13	0.03	0.12	0.07	0.02	0.01	0.01	0	0.01		310.56	0.65	0.481196	0.878049	1.09364
	343-L2	2.94	14.6	50.56	0.3	10.24	0.15	7.8	7.92	1.46	0.04	0.25	0	0.2	96.48	215	167	201	241	251	330	349	130	122	113	61		104		0.07	0.08	0.3	0.03	0.13	0.03	0.12	0.07	0.02	0.01	0.01	0	0.01		320.58	0.6	0.444181	0.88743	1.122
	343-L2	2.96	14.6	50.58	0.3	10.28	0.18	7.79	7.92	1.44	0.04	0.24	0	0.17	96.51	218	164	207	237	258	319	342	134	125	112	61		116		0.07	0.08	0.3	0.03	0.13	0.03	0.12	0.07	0.02	0.01	0.01	0	0.01		330.6	0.56	0.414569	0.894934	1.14606
	343-L2	3	14.6	50.52	0.34	10.16	0.17	7.77	7.97	1.44	0.04	0.25	0.03	0.19	96.48	219	165	208	219	250	323	356	136	121	112	61	547	115		0.07	0.08	0.3	0.03	0.13	0.03	0.12	0.07	0.02	0.01	0.01	0.05	0.02		340.61	0.52	0.384957	0.902439	1.17153
	343-L2	2.99	14.62	50.43	0.33	10.14	0.17	7.84	7.99	1.44	0.05	0.25	0	0.18	96.41	218	171	207	227	260	322	336	138	123	111	61		115		0.07	0.08	0.3	0.03	0.13	0.03	0.12	0.07	0.02	0.01	0.01	0	0.01		350.63	0.49	0.362748	0.908068	1.19168
	343-L2	2.96	14.71	50.47	0.33	10.23	0.18	7.79	7.93	1.45	0.04	0.24	0	0.19	96.53	218	161	207	224	248	324	354	135	121	111	61		107		0.07	0.08	0.3	0.03	0.13	0.03	0.12	0.07	0.02	0.01	0.01	0	0.01		360.65	0.46	0.340539	0.913696	1.21285
	343-L2	2.99	14.72	50.54	0.31	10.17	0.17	7.8	7.95	1.46	0.04	0.24	0	0.18	96.57	204	165	205	234	256	331	358	135	119	112	61		112		0.07	0.08	0.3	0.03	0.13	0.03	0.12	0.07	0.02	0.01	0.01	0	0.01		370.67	0.43	0.31833	0.919325	1.23516
	343-L2	2.96	14.61	50.7	0.32	10.17	0.19	7.94	7.86	1.45	0.04	0.25	0	0.18	96.66	230	170	206	225	251	308	350	139	122	113	61		121		0.07	0.08	0.3	0.03	0.13	0.03	0.12	0.07	0.02	0.01	0.01	0	0.02		380.69	0.41	0.303524	0.923077	1.25075
	343-L2	2.97	14.62	50.42	0.32	10.17	0.15	7.84	7.95	1.45	0.04	0.25	0.01	0.21	96.4	221	176	209	219	260	330	338	129	122	113	61	570	104		0.07	0.08	0.3	0.03	0.13	0.03	0.12	0.07	0.02	0.01	0.01	0.05	0.01		390.7	0.4	0.296121	0.924953	1.25878
	343-L2	2.92	14.81	50.58	0.31	10.13	0.15	7.84	7.81	1.45	0.04	0.25	0	0.18	96.48	225	166	201	225	250	333	364	136	121	112	61		119		0.07	0.08	0.3	0.03	0.13	0.03	0.12	0.07	0.02	0.01	0.01	0	0.02		400.73	0.38	0.281315	0.928705	1.27534
	343-L2	2.94	14.71	50.63	0.35	10.13	0.13	7.85	7.86	1.44	0.05	0.25	0	0.2	96.56	225	169	201	209	259	358	347	132	124	111	61		104		0.07	0.08	0.3	0.03	0.13	0.03	0.12	0.07	0.02	0.01	0.01	0	0.01		410.74	0.36	0.266509	0.932458	1.29263
	343-L2	2.97	14.7	50.63	0.32	10.17	0.15	7.91	7.82	1.45	0.06	0.26	0	0.2	96.63	223	167	202	221	251	330	348	132	123	111	61		120		0.07	0.08	0.3	0.03	0.13	0.03	0.12	0.07	0.02	0.01	0.01	0	0.02		420.76	0.35	0.259106	0.934334	1.30157
	343-L2	2.9	14.84	50.31	0.32	10.15	0.18	7.74	7.76	1.46	0.04	0.25	0	0.2	96.16	224	165	200	233	248	324	358	137	120	112	61		116		0.07	0.08	0.3	0.03	0.13	0.03	0.12	0.07	0.02	0.01	0.01	0	0.02		430.78	0.33	0.2443	0.938086	1.32011
	343-L2	2.95	14.66	50.71	0.31	10.19	0.2	7.85	7.84	1.47	0.04	0.25	0	0.21	96.68	211	171	203	232	250	319	349	137	119	112	61		112		0.07	0.08	0.3	0.03	0.13	0.03	0.12	0.07	0.02	0.01	0.01	0	0.02		440.8	0.33	0.2443	0.938086	1.32011
	343-L2	2.95	14.81	50.68	0.32	10.13	0.17	7.86	7.84	1.44	0.03	0.26	0	0.19	96.67	220	167	203	226	267	333	341	134	123	113	61	559	107		0.07	0.08	0.3	0.03	0.13	0.03	0.12	0.07	0.02	0.01	0.01	0.05	0.01		450.82	0.31	0.229494	0.941839	1.3396
	343-L2	2.91	14.67	50.74	0.31	10.19	0.15	7.76	7.83	1.43	0.04	0.26	0	0.2	96.49	214	168	199	230	259	335	346	142	121	112	61		110		0.07	0.08	0.3	0.03	0.13	0.03	0.12	0.07	0.02	0.01	0.01	0	0.01		460.83	0.31	0.229494	0.941839	1.3396
	343-L2	2.93	14.67	50.65	0.31	10.17	0.18	7.82	7.88	1.44	0.05	0.25	0	0.18	96.53	221	174	205	234	255	317	344	137	122	111	61		111		0.07	0.08	0.3	0.03	0.13	0.03	0.12	0.07	0.02	0.01	0.01	0	0.01		470.85	0.3	0.222091	0.943715	1.34974
	343-L2	2.93	14.78	50.49	0.31	10.09	0.17	7.78	7.8	1.46	0.04	0.26	0	0.17	96.28	225	164	207	223	255	323	344	135	121	112	61		116		0.07	0.08	0.3	0.03	0.13	0.03	0.12	0.07	0.02	0.01	0.01	0	0.01		480.87	0.3	0.222091	0.943715	1.34974
	343-L2	2.96	14.79	50.73	0.31	10.15	0.14	7.8	7.82	1.48	0.04	0.26	0	0.21	96.69	213	167	204	238	247	353	356	137	120	112	61		107		0.07	0.08	0.3	0.03	0.13	0.03	0.12	0.07	0.02	0.01	0.01	0	0.02		490.89	0.29	0.214688	0.945591	1.36017
	343-L2	2.94	14.73	50.69	0.31	10.18	0.14	7.8	7.85	1.43	0.04	0.26	0.01	0.19	96.56	222	162	203	244	253	335	353	137	122	111	61	563	114		0.07	0.08	0.3	0.03	0.13	0.03	0.12	0.07	0.02	0.01	0.01	0.05	0.02		500.9	0.29	0.214688	0.945591	1.36017
	343-L2	2.96	14.69	50.66	0.34	10.11	0.17	7.79	7.79	1.46	0.04	0.26	0.02	0.18	96.46	212	173	207	218	264	326	340	136	122	111	61	561	113		0.07	0.08	0.3	0.03	0.13	0.03	0.12	0.07	0.02	0.01	0.01	0.05	0.01		510.92	0.29	0.214688	0.945591	1.36017
	343-L2	2.96	14.68	50.6	0.3	10.2	0.17	7.69	7.77	1.46	0.05	0.26	0.01	0.18	96.33	218	165	202	236	263	333	358	141	121	112	61	561	113		0.07	0.08	0.3	0.03	0.13	0.03	0.12	0.07	0.02	0.01	0.01	0.05	0.01		520.94	0.29	0.214688	0.945591	1.36017
	343-L2	2.96	14.75	50.7	0.32	10.1	0.14	7.72	7.85	1.45	0.05	0.27	0	0.2	96.5	216	163	201	230	258	357	357	135	119	112	61		113		0.07	0.08	0.3	0.03	0.13	0.03	0.12	0.07	0.02	0.01	0.01	0	0.02		530.96	0.28	0.207285	0.947467	1.3709
	343-L2	2.93	14.78	50.51	0.32	10.14	0.17	7.78	7.79	1.46	0.05	0.27	0	0.16	96.36	228	161	206	228	251	326	367	135	123	111	61		116		0.07	0.08	0.3	0.03	0.13	0.03	0.12	0.07	0.02	0.01	0.01	0	0.01		540.98	0.27	0.199882	0.949343	1.38195
	343-L2	3	14.8	50.53	0.34	10.17	0.16	7.75	7.75	1.44	0.04	0.27	0.01	0.18	96.44	219	169	202	214	260	334	359	138	122	111	61	559	120		0.07	0.08	0.3	0.03	0.13	0.03	0.12	0.07	0.02	0.01	0.01	0.05	0.02		550.99	0.27	0.199882	0.949343	1.38195
	343-L2	2.97	14.68	50.53	0.3	10.18	0.17	7.71	7.8	1.46	0.05	0.27	0	0.18	96.3	219	170	205	231	255	329	369	139	121	112	61		126		0.07	0.08	0.3	0.03	0.13	0.03	0.12	0.07	0.02	0.01	0.01	0	0.02		561.01	0.27	0.199882	0.949343	1.38195
	343-L2	2.97	14.74	50.54	0.3	10.11	0.16	7.77	7.83	1.46	0.05	0.27	0	0.17	96.39	217	170	205	233	256	346	337	137	123	112	61		112		0.07	0.08	0.3	0.03	0.13	0.03	0.12	0.07	0.02	0.01	0.01	0	0.01		571.03	0.27	0.199882	0.949343	1.38195
	343-L2	3	14.81	50.61	0.31	10.08	0.18	7.78	7.78	1.44	0.04	0.28	0	0.19	96.49	209	169	205	232	262	322	377	137	121	112	61		110		0.07	0.08	0.3	0.03	0.13	0.03	0.12	0.07	0.02	0.01	0.01	0	0.01		581.05	0.27	0.199882	0.949343	1.38195
	343-L2	2.96	14.66	50.85	0.33	10.2	0.17	7.78	7.86	1.45	0.04	0.29	0	0.19	96.79	230	162	208	209	261	317	358	136	121	113	61		117		0.07	0.08	0.3	0.03	0.13	0.03	0.12	0.07	0.02	0.01	0.01	0	0.02		591.07	0.26	0.192479	0.95122	1.39336
	343-L2	2.94	14.77	50.51	0.33	10.13	0.18	7.85	7.86	1.45	0.05	0.29	0	0.19	96.53	205	166	202	217	256	326	339	133	119	112	61		116		0.07	0.08	0.3	0.03	0.13	0.03	0.12	0.07	0.02	0.01	0.01	0	0.02		601.08	0.26	0.192479	0.95122	1.39336
	343-L2	2.95	14.65	50.62	0.29	10.17	0.14	7.72	7.82	1.44	0.04	0.29	0	0.2	96.33	217	165	205	232	258	337	355	134	117	111	61		108		0.07	0.08	0.3	0.03	0.13	0.03	0.12	0.07	0.02	0.01	0.01	0	0.01		611.1	0.26	0.192479	0.95122	1.39336
	343-L2	2.95	14.69	50.6	0.3	10.17	0.17	7.81	7.86	1.45	0.04	0.29	0	0.19	96.52	233	170	202	234	267	323	363	134	123	112	61		108		0.07	0.08	0.3	0.03	0.13	0.03	0.12	0.07	0.02	0.01	0.01	0	0.01		621.12	0.26	0.192479	0.95122	1.39336
	343-L2	2.98	14.72	50.6	0.3	10.09	0.15	7.76	7.87	1.47	0.04	0.3	0	0.19	96.47	202	169	206	237	260	325	352	131	121	113	61	561	102		0.07	0.08	0.3	0.03	0.13	0.03	0.12	0.07	0.02	0.01	0.01	0.05	0.01		631.14	0.26	0.192479	0.95122	1.39336
	343-L2	2.97	14.61	50.46	0.3	10.12	0.16	7.78	7.81	1.44	0.04	0.3	0	0.17	96.17	216	163	205	227	239	336	335	140	123	112	61		116		0.07	0.08	0.3	0.03	0.13	0.03	0.12	0.07	0.02	0.01	0.01	0	0.01		641.15	0.25	0.185076	0.953096	1.40514
	343-L2	2.97	14.67	50.46	0.29	10.2	0.17	7.73	7.82	1.47	0.04	0.31	0	0.19	96.33	223	172	205	248	263	319	363	136	118	112	61		116		0.07	0.08	0.3	0.03	0.13	0.03	0.12	0.07	0.02	0.01	0.01	0	0.02		651.17	0.26	0.192479	0.95122	1.39336
	343-L2	2.95	14.72	50.51	0.29	10.14	0.16	7.7	7.83	1.43	0.05	0.31	0	0.17	96.27	213	161	202	226	253	327	346	143	121	111	61		121		0.07	0.08	0.3	0.03	0.13	0.03	0.12	0.07	0.02	0.01	0.01	0	0.02		661.19	0.26	0.192479	0.95122	1.39336
	343-L2	2.95	14.66	50.6	0.32	10.14	0.17	7.8	7.78	1.45	0.05	0.33	0	0.19	96.42	223	164	201	228	257	330	341	134	123	111	61		114		0.07	0.08	0.3	0.03	0.13	0.03	0.12	0.07	0.02	0.01	0.01	0	0.01		671.21	0.25	0.185076	0.953096	1.40514
	343-L2	2.96	14.66	50.69	0.32	10.1	0.18	7.75	7.84	1.45	0.04	0.33	0	0.19	96.51	214	162	202	216	255	315	354	130	123	112	62		103		0.07	0.08	0.3	0.03	0.13	0.03	0.12	0.07	0.02	0.01	0.01	0	0.01		681.23	0.25	0.185076	0.953096	1.40514
	343-L2	3.01	14.74	50.61	0.31	10.18	0.15	7.79	7.83	1.45	0.04	0.35	0	0.19	96.65	217	163	204	220	247	341	360	138	122	113	62		112		0.07	0.08	0.3	0.03	0.13	0.03	0.12	0.07	0.02	0.01	0.01	0	0.01		691.24	0.26	0.192479	0.95122	1.39336
	343-L2	2.97	14.65	50.53	0.33	10.1	0.15	7.74	7.9	1.46	0.04	0.36	0	0.19	96.43	219	164	201	224	263	334	374	134	117	112	61		110		0.07	0.08	0.3	0.03	0.13	0.03	0.12	0.07	0.02	0.01	0.01	0	0.01		701.26	0.25	0.185076	0.953096	1.40514
	343-L2	2.96	14.72	50.65	0.31	10.05	0.16	7.65	7.83	1.45	0.05	0.38	0	0.18	96.39	221	168	203	225	251	320	358	131	122	112	61		116		0.07	0.08	0.3	0.03	0.13	0.03	0.12	0.07	0.02	0.01	0.01	0	0.01		711.28	0.25	0.185076	0.953096	1.40514
	343-L2	2.97	14.61	50.65	0.31	10.2	0.17	7.71	7.84	1.44	0.05	0.4	0.03	0.19	96.56	215	169	207	232	254	324	352	135	122	111	61	555	114		0.07	0.08	0.3	0.03	0.13	0.03	0.12	0.07	0.02	0.01	0.01	0.05	0.02		721.3	0.25	0.185076	0.953096	1.40514
	343-L2	2.93	14.65	50.47	0.31	10.07	0.17	7.63	7.74	1.43	0.04	0.41	0	0.19	96.04	216	161	202	235	273	325	362	133	121	112	61		114		0.07	0.08	0.3	0.03	0.13	0.03	0.12	0.07	0.02	0.01	0.01	0	0.01		731.32	0.25	0.185076	0.953096	1.40514
	343-L2	2.94	14.66	50.47	0.29	10.02	0.16	7.7	7.76	1.43	0.04	0.43	0	0.16	96.06	206	166	204	235	260	320	353	140	120	113	62		119		0.07	0.08	0.3	0.03	0.13	0.03	0.12	0.07	0.02	0.01	0.01	0	0.01		741.33	0.24	0.177672	0.954972	1.41732
	343-L2	2.99	14.7	50.76	0.33	10.08	0.16	7.73	7.76	1.43	0.04	0.46	0	0.18	96.63	223	165	197	228	247	329	342	126	121	112	62		125		0.07	0.08	0.3	0.03	0.13	0.03	0.12	0.07	0.02	0.01	0.01	0	0.02		751.35	0.24	0.177672	0.954972	1.41732
	343-L2	3	14.58	50.62	0.3	10	0.16	7.75	7.81	1.45	0.05	0.49	0	0.19	96.4	220	173	206	238	262	328	345	132	121	111	62		109		0.07	0.08	0.3	0.03	0.13	0.03	0.12	0.07	0.02	0.01	0.01	0	0.01		761.37	0.25	0.185076	0.953096	1.40514
	343-L2	2.99	14.53	50.58	0.33	10.06	0.16	7.75	7.72	1.43	0.05	0.52	0.01	0.17	96.29	205	166	202	223	263	338	346	130	121	112	62	558	116		0.07	0.08	0.3	0.03	0.13	0.03	0.12	0.07	0.02	0.01	0.01	0.05	0.01		771.39	0.25	0.185076	0.953096	1.40514
	343-L2	3	14.76	50.6	0.33	10.13	0.15	7.6	7.73	1.43	0.05	0.56	0	0.18	96.53	223	170	201	237	267	331	348	137	122	109	62	562	115		0.07	0.08	0.3	0.03	0.13	0.03	0.12	0.07	0.02	0.01	0.01	0.05	0.01		781.41	0.24	0.177672	0.954972	1.41732
	343-L2	3.02	14.62	50.66	0.31	10.08	0.17	7.61	7.79	1.45	0.04	0.6	0	0.16	96.51	210	170	210	243	245	321	365	135	119	112	62		110		0.07	0.08	0.3	0.03	0.13	0.03	0.12	0.07	0.02	0.01	0.01	0	0.01		791.42	0.25	0.185076	0.953096	1.40514
	343-L2	2.94	14.62	50.59	0.3	10.09	0.13	7.72	7.73	1.42	0.04	0.65	0.01	0.18	96.42	214	159	203	230	262	357	337	136	122	112	62	565	117		0.07	0.08	0.3	0.03	0.13	0.03	0.12	0.07	0.02	0.01	0.01	0.05	0.01		801.44	0.24	0.177672	0.954972	1.41732
	343-L2	2.97	14.58	50.63	0.33	10.02	0.14	7.65	7.84	1.41	0.04	0.7	0	0.16	96.47	226	173	207	221	262	334	359	134	123	112	62		118		0.07	0.08	0.3	0.03	0.13	0.03	0.12	0.07	0.02	0.01	0.01	0	0.01		811.46	0.24	0.177672	0.954972	1.41732
	343-L2	2.93	14.59	50.55	0.3	10.02	0.16	7.76	7.64	1.41	0.04	0.76	0	0.2	96.35	220	165	203	227	263	337	338	137	124	112	62		114		0.07	0.08	0.3	0.03	0.13	0.03	0.12	0.07	0.02	0.01	0.01	0	0.02		821.48	0.24	0.177672	0.954972	1.41732
	343-L2	2.98	14.63	50.51	0.32	9.98	0.16	7.61	7.75	1.43	0.05	0.82	0	0.19	96.42	235	167	207	219	268	325	357	131	121	112	62		110		0.07	0.08	0.3	0.03	0.13	0.03	0.12	0.07	0.02	0.01	0.01	0	0.01		831.5	0.23	0.170269	0.956848	1.42994
	343-L2	2.99	14.54	50.5	0.3	10.14	0.16	7.66	7.77	1.43	0.04	0.9	0.01	0.18	96.63	218	161	205	231	252	334	335	135	121	113	62	572	116		0.07	0.08	0.3	0.03	0.13	0.03	0.12	0.07	0.02	0.01	0.01	0.05	0.01		841.51	0.23	0.170269	0.956848	1.42994
	343-L2	2.99	14.55	50.56	0.34	10.09	0.16	7.67	7.74	1.42	0.05	0.98	0	0.18	96.71	223	163	204	222	252	330	363	139	120	111	63		112		0.07	0.08	0.3	0.03	0.13	0.03	0.12	0.07	0.02	0.01	0.01	0	0.01		851.53	0.23	0.170269	0.956848	1.42994
	343-L2	3.01	14.57	50.41	0.31	10.03	0.16	7.57	7.74	1.42	0.04	1.06	0	0.18	96.5	230	173	202	224	255	334	348	132	122	113	63		109		0.07	0.08	0.3	0.03	0.13	0.03	0.12	0.07	0.02	0.01	0.01	0	0.01		861.55	0.23	0.170269	0.956848	1.42994
	343-L2	3.02	14.38	50.23	0.32	9.94	0.17	7.61	7.63	1.39	0.03	1.16	0.01	0.18	96.06	230	166	208	234	248	310	336	134	121	113	63	569	119		0.07	0.08	0.3	0.03	0.13	0.03	0.12	0.07	0.02	0.01	0.01	0.05	0.02		871.57	0.23	0.170269	0.956848	1.42994
	343-L2	2.96	14.45	50.29	0.29	9.95	0.15	7.6	7.67	1.41	0.05	1.28	0	0.18	96.26	239	176	205	229	257	320	330	136	123	112	63		111		0.07	0.08	0.3	0.03	0.13	0.03	0.12	0.07	0.02	0.01	0.01	0	0.01		881.59	0.23	0.170269	0.956848	1.42994
	343-L2	2.98	14.42	49.95	0.3	9.94	0.16	7.6	7.72	1.41	0.04	1.37	0	0.18	96.07	226	168	205	232	244	335	364	129	120	112	63	583	110		0.07	0.08	0.3	0.03	0.13	0.03	0.12	0.07	0.02	0.01	0.01	0.05	0.01		891.6	0.22	0.162866	0.958724	1.44303
	343-L2	2.98	14.43	50.18	0.32	9.95	0.16	7.51	7.65	1.39	0.05	1.5	0.01	0.17	96.28	222	159	204	219	251	333	347	137	121	112	63	566	120		0.07	0.08	0.3	0.03	0.13	0.03	0.12	0.07	0.02	0.01	0.01	0.05	0.01		901.62	0.23	0.170269	0.956848	1.42994
	343-L2	2.94	14.32	50.06	0.32	10.03	0.15	7.57	7.65	1.38	0.04	1.63	0.02	0.19	96.29	210	168	205	232	260	333	367	130	126	113	64	560	116		0.07	0.08	0.3	0.03	0.13	0.03	0.12	0.07	0.02	0.01	0.01	0.05	0.02		911.64	0.23	0.170269	0.956848	1.42994
	343-L2	2.93	14.13	49.83	0.34	9.88	0.19	7.56	7.61	1.39	0.05	1.78	0.02	0.19	95.9	225	167	207	215	262	304	359	139	122	111	64	557	118		0.07	0.08	0.3	0.03	0.12	0.03	0.12	0.07	0.02	0.01	0.01	0.05	0.02		921.66	0.23	0.170269	0.956848	1.42994
	343-L2	2.11	8.14	26.66	0.29	6.63	0.13	5.77	5.33	0.94	0.04	0.88	0	0.09	57	201	130	162	192	210	312	322	108	102	94	45		81		0.06	0.06	0.17	0.03	0.1	0.03	0.1	0.06	0.02	0.01	0.01	0	0.01		931.68	0.23	0.170269	0.956848	1.42994
	343-L2	2.97	14.05	49.61	0.32	9.95	0.16	7.58	7.76	1.41	0.04	2.03	0.05	0.18	96.1	231	165	209	224	252	324	339	133	120	113	64	560	119		0.07	0.08	0.3	0.03	0.13	0.03	0.12	0.07	0.02	0.01	0.01	0.05	0.01		941.69	0.22	0.162866	0.958724	1.44303
	343-L2	2.91	13.88	49.6	0.31	10.02	0.15	7.56	7.78	1.4	0.05	2.19	0.01	0.16	96.02	224	169	207	228	256	343	346	136	121	113	64	559	121		0.07	0.08	0.3	0.03	0.13	0.03	0.12	0.07	0.02	0.01	0.01	0.05	0.01		951.71	0.22	0.162866	0.958724	1.44303
	343-L2	2.95	13.89	49.35	0.3	9.89	0.15	7.51	7.75	1.39	0.04	2.38	0.02	0.17	95.79	228	162	204	246	252	344	358	136	123	113	65	569	118		0.07	0.08	0.3	0.03	0.12	0.03	0.12	0.07	0.02	0.01	0.01	0.05	0.01		961.73	0.22	0.162866	0.958724	1.44303
	343-L2	2.45	2.6	9.42	0.36	8.18	0.09	5.37	5.72	0.57	0.02	1.01	0.01	0.02	35.82	216	87	101	197	223	274	313	137	80	86	45	300	52		0.07	0.03	0.07	0.03	0.11	0.03	0.1	0.06	0.01	0.01	0.01	0.03	0.01		971.75	0.22	0.162866	0.958724	1.44303
	343-L2	1.11	13.08	46.74	0.31	9.44	0.15	7.47	3.84	1.37	0.04	2.29	0.04	0.21	86.08	170	156	200	232	258	332	354	104	122	113	60	540	123		0.04	0.08	0.28	0.03	0.12	0.03	0.12	0.05	0.02	0.01	0.01	0.05	0.02		981.77	0.22	0.162866	0.958724	1.44303
	343-L2	2.81	13.92	49.43	0.3	9.84	0.17	7.62	7.68	1.4	0.05	2.93	0.06	0.16	96.38	229	163	207	238	269	333	373	128	123	113	66	567	130		0.07	0.08	0.3	0.03	0.12	0.03	0.12	0.07	0.02	0.01	0.01	0.05	0.02		991.78	0.22	0.162866	0.958724	1.44303
	343-L2	2.83	13.85	49.38	0.3	9.82	0.16	7.66	7.62	1.41	0.05	3.17	0.03	0.19	96.47	241	170	208	232	263	327	344	135	119	113	66	571	115		0.07	0.08	0.3	0.03	0.12	0.03	0.12	0.07	0.02	0.01	0.01	0.05	0.02		1001.8	0.22	0.162866	0.958724	1.44303
	343-L2	2.82	13.7	49.07	0.3	9.9	0.15	7.62	7.71	1.38	0.04	3.4	0.04	0.17	96.3	253	163	210	235	252	343	361	131	124	114	67	578	127		0.07	0.08	0.29	0.03	0.12	0.03	0.12	0.07	0.02	0.01	0.01	0.05	0.02		1011.82	0.21	0.155463	0.9606	1.45663
	343-L2	2.83	13.57	48.92	0.29	9.85	0.18	7.64	7.6	1.4	0.04	3.63	0.05	0.17	96.17	239	168	210	230	253	341	347	126	124	114	67	573	123		0.07	0.08	0.29	0.03	0.12	0.03	0.12	0.07	0.02	0.01	0.01	0.05	0.01		1021.84	0.21	0.155463	0.9606	1.45663
	343-L2	2.8	13.59	48.75	0.28	9.76	0.15	7.59	7.59	1.41	0.04	3.88	0.08	0.17	96.09	250	166	207	228	266	357	357	136	122	113	67	571	118		0.07	0.08	0.29	0.03	0.12	0.03	0.12	0.07	0.02	0.01	0.02	0.05	0.01		1031.86	0.21	0.155463	0.9606	1.45663
	343-L2	2.75	13.41	48.56	0.28	9.82	0.16	7.64	7.62	1.38	0.04	4.14	0.05	0.17	96.03	246	163	208	225	263	321	346	142	124	116	68	572	122		0.07	0.08	0.29	0.03	0.12	0.03	0.12	0.07	0.02	0.01	0.02	0.05	0.01		1041.87	0.21	0.155463	0.9606	1.45663
	343-L2	2.73	13.31	48.37	0.29	9.77	0.18	7.61	7.64	1.4	0.05	4.38	0.08	0.18	95.98	235	160	202	232	263	314	356	140	124	115	68	575	127		0.07	0.08	0.29	0.03	0.12	0.03	0.12	0.07	0.02	0.01	0.02	0.05	0.02		1051.89	0.21	0.155463	0.9606	1.45663
	343-L2	2.7	13.2	48.33	0.27	9.82	0.14	7.7	7.61	1.4	0.04	4.66	0.07	0.14	96.1	259	163	209	238	252	338	361	128	126	116	69	572	131		0.07	0.08	0.29	0.03	0.12	0.03	0.12	0.07	0.02	0.01	0.02	0.05	0.01		1061.91	0.21	0.155463	0.9606	1.45663
	343-L2	2.68	13.09	48.2	0.29	9.85	0.18	7.55	7.56	1.39	0.04	4.92	0.13	0.16	96.05	254	172	201	237	274	332	361	142	125	116	69	546	121		0.07	0.08	0.29	0.03	0.12	0.03	0.12	0.07	0.02	0.01	0.02	0.05	0.01		1071.93	0.21	0.155463	0.9606	1.45663
	343-L2	2.64	13.03	47.99	0.28	9.79	0.15	7.66	7.57	1.4	0.06	5.21	0.09	0.16	96.02	254	164	207	234	269	342	363	133	125	114	69	581	122		0.07	0.08	0.29	0.03	0.12	0.03	0.12	0.07	0.02	0.01	0.02	0.05	0.01		1081.95	0.2	0.14806	0.962477	1.4708
	343-L2	2.64	12.95	47.94	0.24	9.8	0.17	7.68	7.59	1.43	0.04	5.33	0.07	0.19	96.09	266	166	209	249	255	326	363	143	124	114	70	584	124		0.07	0.08	0.29	0.03	0.12	0.03	0.12	0.07	0.02	0.01	0.02	0.05	0.02		1091.96	0.2	0.14806	0.962477	1.4708
	343-L2	1.64	9.53	43.14	0.21	6.95	0.12	5.4	5.08	1.02	0.03	25.29	0.5	0.08	98.98	355	162	213	227	268	359	383	127	134	124	125	583	163		0.06	0.06	0.26	0.03	0.1	0.03	0.1	0.05	0.02	0.01	0.07	0.06	0.02		1101.98	0.2	0.14806	0.962477	1.4708
	343-L2	0	0	31.27	0	0.01	0.02	0.13	0	0	0	64.13	1.21	0	96.77			235	291	295	404	437			142	266	583			0	0	0.19	0.02	0.02	0.03	0.04	0	0	0.01	0.18	0.07	0		1112	0.21	0.155463	0.9606	1.45663
[truncated: 3 more columns]
