# Supplementary material
Source: Research Square preprint supplement (doi:10.21203/rs.3.rs-9168576/v1)
Supplement: Supplementary file 1 [file b43f5023ecd5b906003e9349.pdf]

Supplementary Materials for  
**Zircon behavior in the partially melted mantle**

Alisa Yakimenko<sup>1,2\*</sup>, Anastassia Borisova<sup>1</sup>, Yana Fedortchouk<sup>2</sup>, Lydia Fairhurst<sup>2</sup>

Corresponding author: [al480337@dal.ca](mailto:al480337@dal.ca), [alisa.yakimenko@get.omp.eu](mailto:alisa.yakimenko@get.omp.eu)

**The PDF file includes:**

Figs. S1 to S7  
Table S1

**Other Supplementary Materials for this manuscript include the following:**

Data S1-S8

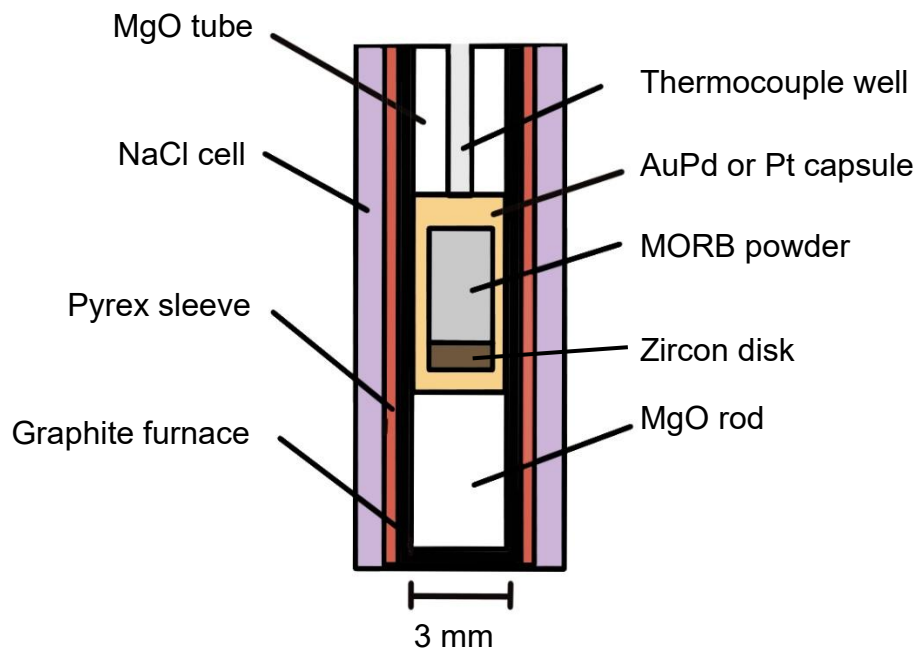

**Fig. S1.**

Schematic illustration of the experimental set-up showing a capsule with a zircon disk filled with MORB.

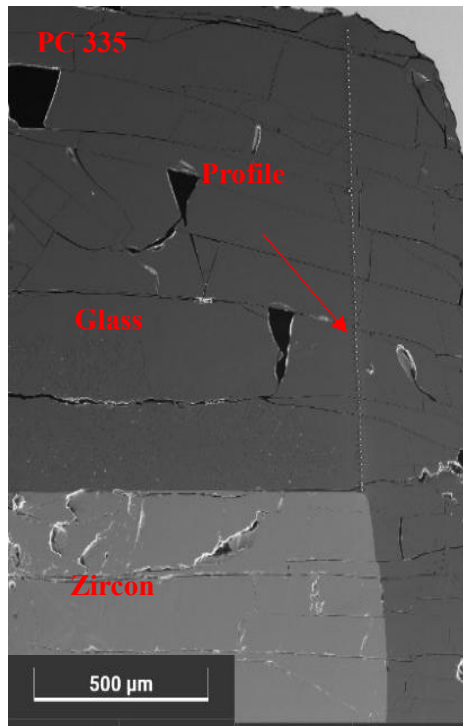

**Fig. S2.**

Secondary electron image showing the location of compositional profiles obtained with EPMA.

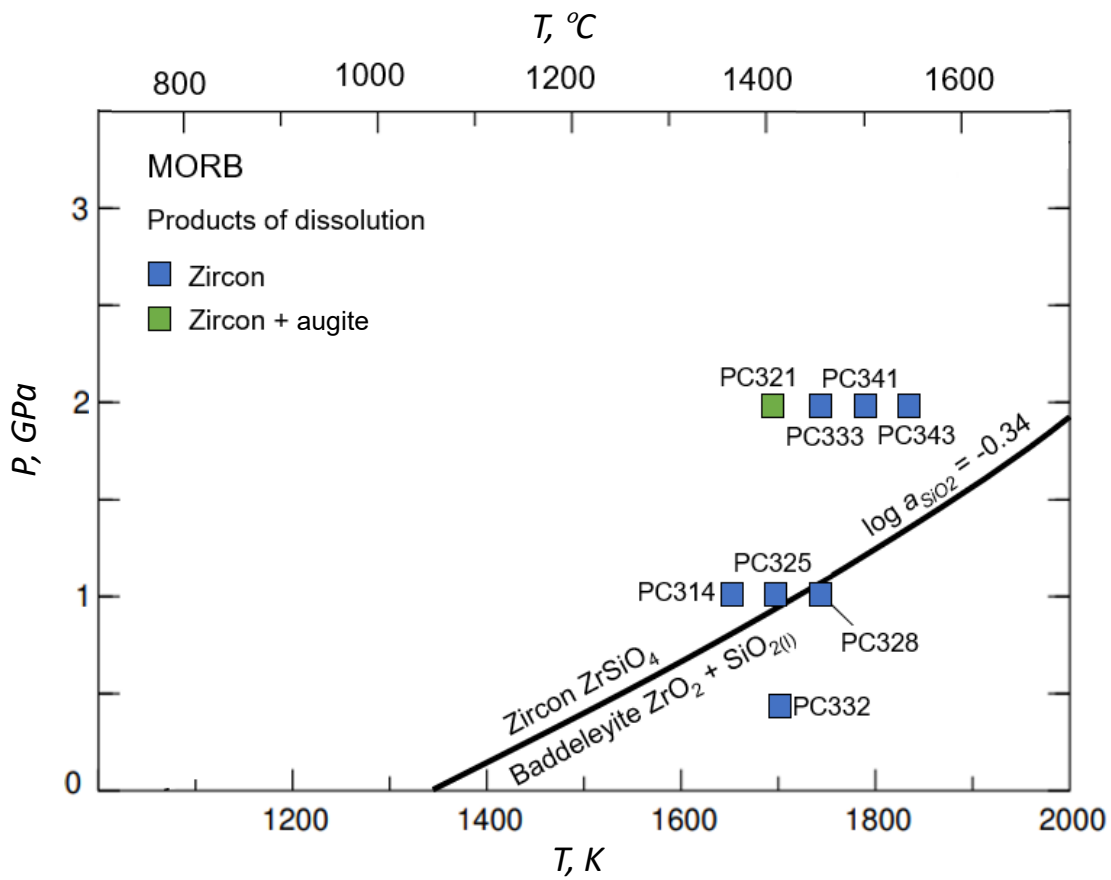

**Fig. S3.**

*P*–*T* conditions of zircon dissolution experiments and the position of Zrn–Bdy reaction. Silica activity of Zrn–Bdy reaction for MORB was calculated using MELTS software, and the *P*–*T* position of the line was determined using *Perple\_X*.

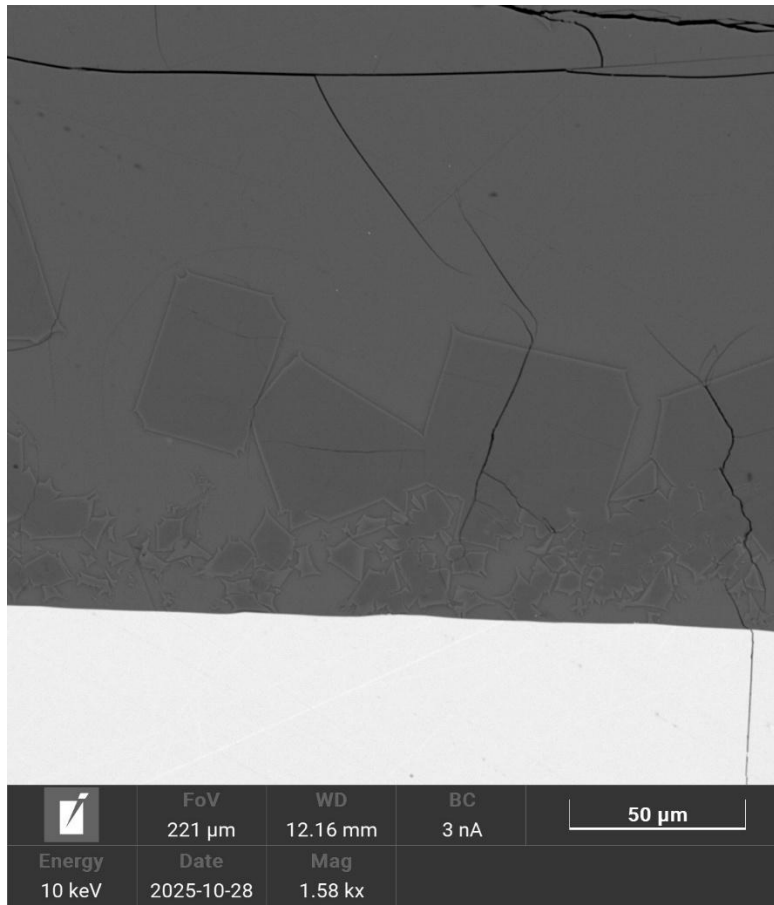

**Fig. S4.**  
BSE image of sample PC321 showing augite crystals along the zircon interface.

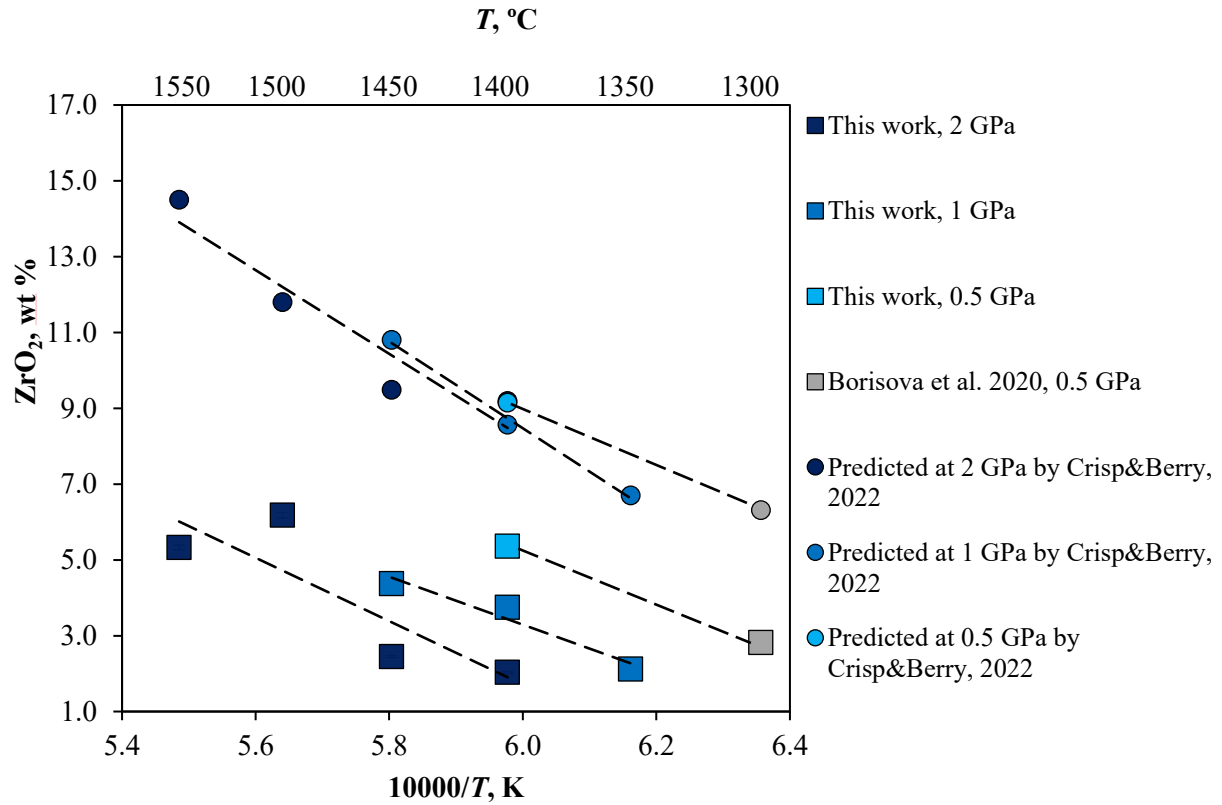

**Fig S5.**

Zircon saturation obtained in our experiments (squares) and predicted by the model of Crisp and Berry (12) as a function of temperature.

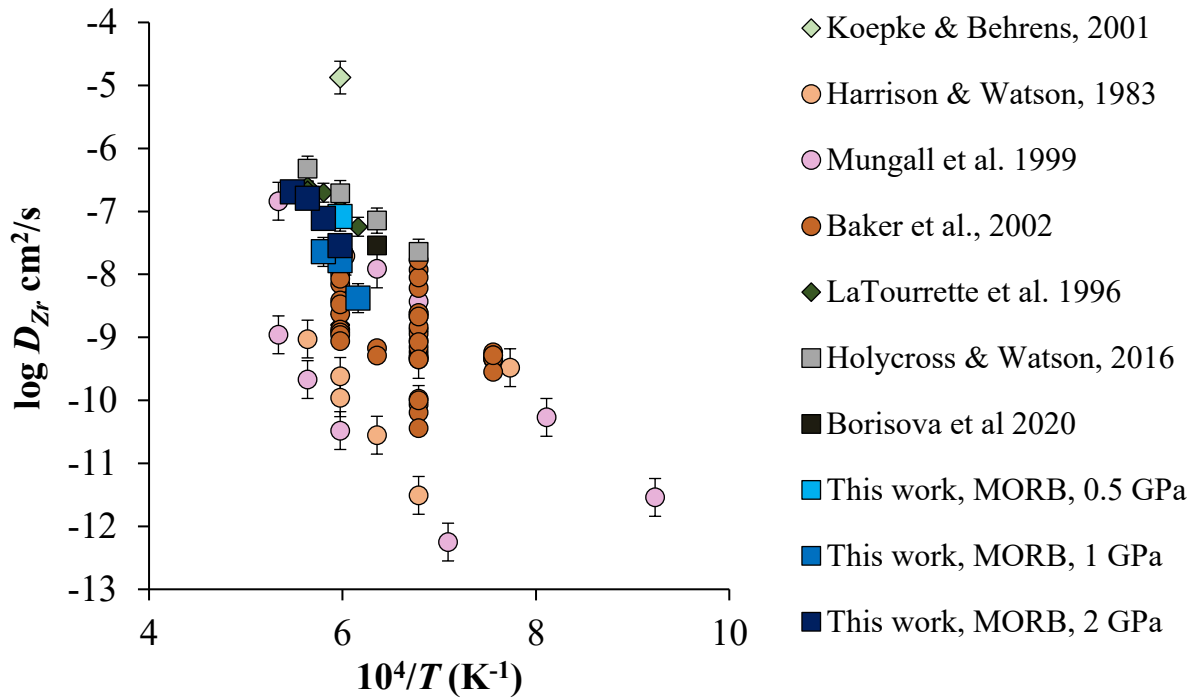

**Fig. S6.**

Zr diffusion coefficients in melts of different composition versus temperature. Circles – felsic compositions, squares – basalts, green diamonds – synthetic andesitic melt, dark green diamonds – forsterite-diopside-anorthite melt. The new data from this study for MORB is shown in blue squares.

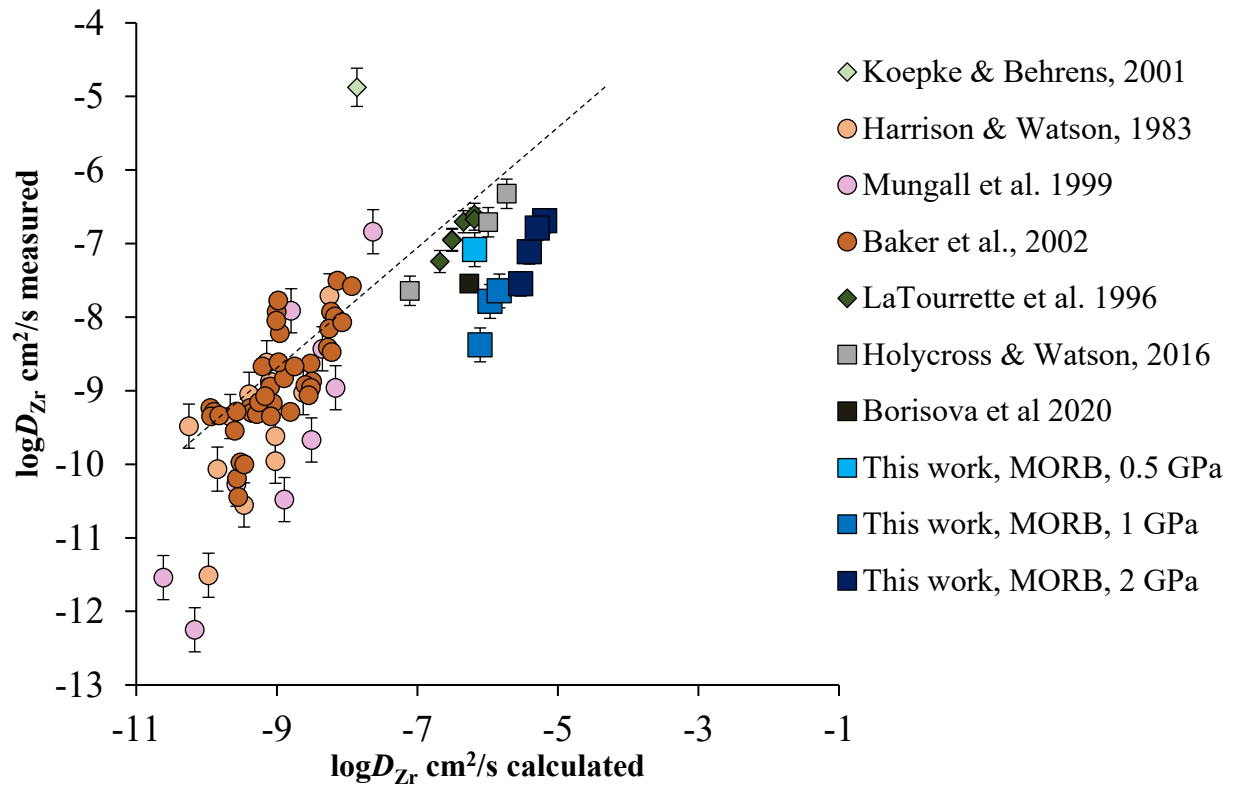

**Fig. S7.**

Comparison of  $\log D_{Zr}$  obtained from experiments with that calculated using the Zhang (2016) model. Circles – felsic compositions, squares – basalts, green diamonds – synthetic andesitic melt, dark green diamonds – forsterite-diopside-anorthite melt. The new data of this study for MORB is shown in blue squares. The dashed line indicates where the measured  $\log D_{Zr}$  equals the  $\log D_{Zr}$  calculated using the model (1:1).

**Table S1.**  
Starting composition

| wt. %                          | <b>MORB 3786/3</b> | <b>Zircon</b> |
|--------------------------------|--------------------|---------------|
| SiO <sub>2</sub>               | 50.31              | 30.74         |
| Al <sub>2</sub> O <sub>3</sub> | 15.31              | 0.00          |
| Fe <sub>2</sub> O <sub>3</sub> | 9.90               | 0.22          |
| MnO                            | 0.17               | 0.00          |
| MgO                            | 8.21               | 0.04          |
| CaO                            | 10.29              | 0.00          |
| Na <sub>2</sub> O              | 3.04               | 0.00          |
| K <sub>2</sub> O               | 0.31               | 0.00          |
| TiO <sub>2</sub>               | 1.45               | 0.00          |
| P <sub>2</sub> O <sub>5</sub>  | 0.18               | 0.00          |
| ZrO <sub>2</sub>               | 0.00               | 63.96         |
| Total                          | 99.15              | 94.96         |

**Data S1-S8. (separate file)**

EPMA data and Zr diffusion extraction calculations.
